# Supplementary material for: Widespread Genotype-Phenotype Correlations in Intellectual Disability
Source: Front Psychiatry. 2018 Oct 29;9:535. doi: 10.3389/fpsyt.2018.00535 (PMC6217001; doi:10.3389/fpsyt.2018.00535)
Supplement: Supplementary file 1 [file Table_1.XLSX]

## Sheet: Abbreviations
Abbreviations & Other Symbols:
ACC = agenesis of the corpus callosum
ACC/PACC = complete and partial agenesis of the corpus callosum
AUT = intellectual disability with autism (with/without epilepsy)
CFD = Complex Facial Dysmorphisms
EPI = intellectual disability with epilepsy (without autism)
GO = Gene Ontology
HFM = hand and foot malformations
HPO = Human Phenotype Ontology
ID = intellectual disability without autism or epilepsy
Macro = macrocephaly
Malf. = malformation
MCD = malformations of cortical development
Micro = microcephaly
MMD = co-occurrence of 2+ movement disorders in a single condition
MP = MGI Mammalian Phenotype
Neocort. = neocortex
NLF = Neurodegenerative-like Features
NONE = No presence of autism or epilepsy
PWM = position weight matrix
Other Cranial = cranial malformations other than micro-/macrocephaly
SFD = Simple Facial Dysmorphisms
Subcort. = subcortical malformations
UMND = Upper Motor Neuron Disease

## Sheet: Table_1
Table 1. List of conditions comprising the different subgroups with associated gene symbols.
Subgroup symbols indicate the presence of the phenotype of interest, e.g., autism, epilepsy,
CFD, etc.
Condition	OMIM#	Subgroup	Gene Symbol
CHARGE Syndrome	214800	AUT/CFD	CHD7
Cohen Syndrome	216550	AUT/CFD	VPS13B
Glass Syndrome	612313	AUT/CFD	SATB2
Fragile X Mental Retardation Syndrome	300624	AUT/CFD	FMR1
Helsmoortel-Van der AA Syndrome	615873	AUT/CFD	ADNP
Kleefstra Syndrome	610253	AUT/CFD	EHMT1
Lujan-Fryns Syndrome	309520	AUT/CFD	MED12
Mental Retardation with Language Impairment and with or without Autistic Features	613670	AUT/CFD	FOXP1
Mental Retardation, Autosomal Dominant 1	156200	AUT/CFD	MBD5
Mental Retardation, Autosomal Dominant 23	615761	AUT/CFD	SETD5
Mental Retardation, Autosomal Dominant 24	615828	AUT/CFD	DEAF1
Mental Retardation, Autosomal Dominant 30	616083	AUT/CFD	ZMYND11
Mental Retardation, X-linked, Syndromic 14	300676	AUT/CFD	UPF3B
Mental Retardation, X-linked, Syndromic, Wu Type	300699	AUT/CFD	GRIA3
Mowat-Wilson Syndrome	235730	AUT/CFD	ZEB2
Mucopoly-saccharidosis, Type IIIA	252900	AUT/CFD	SGSH
Nicolaides-Baraitser Syndrome	601358	AUT/CFD	SMARCA2
Phelan-McDermid Syndrome	606232	AUT/CFD	SHANK3
Schaaf-Yang Syndrome	615547	AUT/CFD	MAGEL2
Smith-Magenis Syndrome	182290	AUT/CFD	RAI1
Temtamy Syndrome	218340	AUT/CFD	C12orf57
Wiedemann-Steiner Syndrome	605130	AUT/CFD	KMT2A
Adenylosuccinase Deficiency	103050	AUT/CFD/NLF	ADSL
Alpha-thalassemia/Mental Retardation Syndrome, X-linked	301040	AUT/CFD/NLF	ATRX
Angelman Syndrome	105830	AUT/CFD/NLF	UBE3A
Cardiofaciocutaneous Syndrome 1	115150	AUT/CFD/NLF	BRAF
Cerebral Creatine Deficiency 1	300352	AUT/CFD/NLF	SLC6A8
Cornelia de Lange Syndrome	122470	AUT/CFD/NLF	NIPBL
			SMC1A
			SMC3
			RAD21
			HDAC8
Lubs X-linked Mental Retardation Syndrome (MECP2 Duplication Syndrome included)	300260	AUT/CFD/NLF	MECP2
Marshall-Smith Syndrome	602535	AUT/CFD/NLF	NFIX
Mental Retardation, X-linked 98	300912	AUT/CFD/NLF	KIAA2022
Mental Retardation, X-linked, Syndromic, Christianson Type	300243	AUT/CFD/NLF	SLC9A6
Myhre Syndrome	139210	AUT/CFD/NLF	SMAD4
Pitt-Hopkins Syndrome	610954	AUT/CFD/NLF	TCF4
Renpenning Syndrome 1	309500	AUT/CFD/NLF	PQBP1
Smith-Lemli-Opitz Syndrome	270400	AUT/CFD/NLF	DHCR7
Tritchothiodystrophy 4, Nonphoto-sensitive	234050	AUT/CFD/NLF	MPLKIP
Warburg Micro Syndrome 4	615663	AUT/CFD/NLF	TBC1D20
Cerebral Creatine Deficiency Syndrome 2	612736	AUT/NLF	GAMT
Epileptic Encephalopathy, Early Infantile, 4	612164	AUT/NLF	STXBP1
Epileptic Encephalopathy, Early Infantile, 6	607208	AUT/NLF	SCN1A
Myotonic Dystrophy 1	160900	AUT/NLF	DMPK
Neurodegeneration due to Cerebral Folate Transport Deficiency	613068	AUT/NLF	FOLR1
Rett Syndrome	312750	AUT/NLF	MECP2
Rett Syndrome, Congenital	613454	AUT/NLF	FOXG1
Arthrogryposis, Mental Retardation, and Seizures	615553	AUT/SFD	SLC35A3
Mental Retardation, Autosomal Recessive 38	615516	AUT/SFD	HERC2
Mental Retardation, X-linked 72	300271	AUT/SFD	RAB39B
Lowe Oculocerebral Syndrome 1	309000	AUT/SFD/NLF	OCRL
Norrie Disease	310600	AUT/SFD/NLF	NDP
Tuberous Sclerosis 2	613254	AUT/SFD/NLF	TSC2
Brunner Syndrome	300615	AUT/NONE	MAOA
Cerebral Creatine Deficiency Syndrome 3	612718	AUT/NONE	GATM
Epileptic Encephalopathy, Childhood Onset	615369	AUT/NONE	CHD2
Epileptic Encephalopathy, Early Infantile, 24	615871	AUT/NONE	HCN1
Epileptic Encephalopathy, Early Infantile, 9	300088	AUT/NONE	PCDH19
Mental Retardation, Autosomal Dominant 5	612621	AUT/NONE	SYNGAP1
Mental Retardation, Autosomal Recessive 3	608443	AUT/NONE	CC2D1A
Muscular Dystrophy-Dystroglycanopathy (Congenital with Mental Retardation), Type B, 3 (Muscle-eye-brain disease)	613151	AUT/NONE	POMGNT1
Acromelic Frontonasal Dysostosis	603671	EPI/CFD	ZSWIM6
Bohring-Opitz Syndrome	605039	EPI/CFD	ASXL1
CK Syndrome	300831	EPI/CFD	NSDHL
Cutis Laxa, Autosomal Recessive, Type IIA	219200	EPI/CFD	ATP6V0A2
Hyperphosphatasia with Mental Retardation Syndrome 4	615716	EPI/CFD	PGAP3
Hypoparathyroidism-retardation-dysmorphism Syndrome	241410	EPI/CFD	TBCE
Koolen-De Vries Syndrome	610443	EPI/CFD	KANSL1
Mandibulofacial Dysostosis, Guion-Almeida Type	610536	EPI/CFD	EFTUD2
Mental Retardation, Autosomal Recessive 41	615637	EPI/CFD	KPTN
Mental Retardation, X-linked 30	300558	EPI/CFD	PAK3
Mental Retardation, X-linked, Syndromic, Snyder-Robinson Type	309583	EPI/CFD	SMS
Microcephaly, Short Stature, and Impaired Glucose Metabolism	616033	EPI/CFD	TRMT10A
Psychomotor Retardation, Epilepsy, and Craniofacial Dysmorphism	614501	EPI/CFD	SNIP1
Seckel Syndrome 1	210600	EPI/CFD	ATR
Aspartylglucosaminuria	208400	EPI/CFD/NLF	AGA
Band-like Calcification with Simplified Gyration and Polymicrogyria	251290	EPI/CFD/NLF	OCLN
Baraitser-Winter Syndrome 1	243310	EPI/CFD/NLF	ACTB
Coloboma, Congenital Heart Disease, Ichthyosiform Dermatosis, Mental Retardation, and Ear Anomalies Syndrome	280000	EPI/CFD/NLF	PIGL
Congenital Disorder of Glycosylation, Type Ie	608799	EPI/CFD/NLF	DPM1
Congenital Disorder of Glycosylation, Type IIa	212066	EPI/CFD/NLF	MGAT2
Cutis Laxa, Autosomal Recessive, Type IIIA	219150	EPI/CFD/NLF	ALDH18A1
Desmosterolosis	602398	EPI/CFD/NLF	DHCR24
Galactosialidosis	256540	EPI/CFD/NLF	CTSA
Leukoencephalopathy, Cystic, without Megalencephaly	612951	EPI/CFD/NLF	RNASET2
Megalencephaly-polymicrogyria-polydactyly-hydrocephalus Syndrome 1	603387	EPI/CFD/NLF	PIK3R2
Mental Retardation, X-linked, Syndromic, Cabezas Type	300354	EPI/CFD/NLF	CUL4B
Microcephaly, Progressive, with Seizures and Cerebral and Cerebellar Atrophy	615760	EPI/CFD/NLF	QARS
Microhydranencephaly	605013	EPI/CFD/NLF	NDE1
Mitochondrial DNA Depletion Syndrome 13 (Encephalomyopathic Type)	615471	EPI/CFD/NLF	FBXL4
Multiple Congenital Anomalies-hypotonia-seizures Syndrome 2	300868	EPI/CFD/NLF	PIGA
Pontocerebellar Hypoplasia, Type 10	615803	EPI/CFD/NLF	CLP1
Pyruvate Dehydrogenase E1-alpha Deficiency	312170	EPI/CFD/NLF	PDHA1
Spastic Paraplegia 49, Autosomal Recessive	615031	EPI/CFD/NLF	TECPR2
Vici Syndrome	242840	EPI/CFD/NLF	EPG5
Warburg Micro Syndrome 3	614222	EPI/CFD/NLF	RAB18
Alternating Hemiplegia of Childhood 1	104290	EPI/NLF	ATP1A2
Alternating Hemiplegia of Childhood 2	614820	EPI/NLF	ATP1A3
Argininemia	207800	EPI/NLF	ARG1
Ceroid Lipofuscinosis, Neuronal, 1	256730	EPI/NLF	PPT1
Congenital Disorder of Glycosylation, Type Ic	603147	EPI/NLF	ALG6
Cortical Dysplasia, Complex, with Other Brain Malformations 1	614039	EPI/NLF	TUBB3
Cortical Dysplasia, Complex, with Other Brain Malformations 2	615282	EPI/NLF	KIF5C
Encephalopathy, Acute, Infection-induced, Susceptibility to, 3	608033	EPI/NLF	RANBP2
Epilepsy, Progressive Myoclonic, 3, with or without Intracellular Inclusions	611726	EPI/NLF	KCTD7
Epileptic Encephalopathy, Early Infantile, 5	613477	EPI/NLF	SPTAN1
Epileptic Encephalopathy, Early Infantile, 7	613720	EPI/NLF	KCNQ2
Epileptic Encephalopathy, Early Infantile, 8	300607	EPI/NLF	ARHGEF9
GLUT1 Deficiency Syndrome 1	606777	EPI/NLF	SLC2A1
Homocystinuria-megaloblastic Anemia, cb1G Complementation Type	250940	EPI/NLF	MTR
Hyperphosphatasia with Mental Retardation Syndrome 3	614207	EPI/NLF	PGAP2
Ichthyosis, Spastic Quadriplegia, and Mental Retardation	614457	EPI/NLF	ELOVL4
Leukodystrophy, Hypomyelin-ating, 5	610532	EPI/NLF	FAM126A
Malonyl-CoA Decarboxylase Deficiency	248360	EPI/NLF	MLYCD
Megaloblastic Anemia due to Dihydrofolate Reductase Deficiency	613839	EPI/NLF	DHFR
Microcephaly 2, Primary, Autosomal Recessive, with or without Cortical Malformations	604317	EPI/NLF	WDR62
Microcephaly, Seizures, and Developmental Delay	613402	EPI/NLF	PNKP
Neurodegeneration with Brain Iron Accumulation 5	300894	EPI/NLF	WDR45
Pelizaeus-Merzbacher Disease	312080	EPI/NLF	PLP1
Phosphoglycerate Dehydrogenase Deficiency	601815	EPI/NLF	PHGDH
Polymicrogyria with Seizures	614833	EPI/NLF	RTTN
Pontocerebellar Hypoplasia, Type 2D	613811	EPI/NLF	SEPSECS
Pontocerebellar Hypoplasia, Type 2E	615851	EPI/NLF	VPS53
Salt and Pepper Developmental Regression Syndrome	609056	EPI/NLF	ST3GAL5
Schindler Disease, Type 1	609241	EPI/NLF	NAGA
Spinocerebellar Ataxia, Autosomal Recessive 13	614831	EPI/NLF	GRM1
Thiamine Metabolism Dysfunction Syndrome 2 (Biotin- or Thiamine-responsive Type)	607483	EPI/NLF	SLC19A3
Epileptic Encephalopathy, Early Infantile, 18	615476	EPI/SFD	SZT2
Microcephaly 5, Primary, Autosomal Recessive	608716	EPI/SFD	ASPM
Congenital Disorder of Glycosylation, Type Is	300884	EPI/SFD/NLF	ALG13
D-2-Hydroxyglutaric Aciduria 1	600721	EPI/SFD/NLF	D2HGDH
Hypermethioninemia due to Adenosine Kinase Deficiency	614300	EPI/SFD/NLF	ADK
Pyruvate Dehydrogenase E3-binding Protein Deficiency	245349	EPI/SFD/NLF	PDX1
Spastic Paraplegia 18, Autosomal Recessive	611225	EPI/SFD/NLF	ERLIN2
Spinocerebellar Ataxia, Autosomal Recessive 12	614322	EPI/SFD/NLF	WWOX
Cortical Dysplasia, Complex, with Other Brain Malformations 5	615763	EPI/NONE	TUBB2A
Epileptic Encephalopathy, Early Infantile, 19	615744	EPI/NONE	GABRA1
Epilepsy, Nocturnal Frontal Lobe, 5	615005	EPI/NONE	KCNT1
Hydrocephalus, Nonsyndromic, Autosomal Recessive 1	236600	EPI/NONE	CCDC88C
Hyperlysinemia, Type I	238700	EPI/NONE	AASS
Hyperprolinemia, Type II	239510	EPI/NONE	ALDH4A1
Mental Retardation, X-linked 96	300802	EPI/NONE	SYP
Muscular Dystrophy-Dystroglycanopathy (Congenital with Mental Retardation), Type B, 14	615351	EPI/NONE	GMPPB
Polymicrogyria with Optic Nerve Hypoplasia	613180	EPI/NONE	TUBA8
Acrodysostosis 1 with or without Hormone Resistance	101800	ID/CFD	PRKAR1A
Alazami Syndrome	615071	ID/CFD	LARP7
Beaulieu-Boycott-Innes Syndrome	613680	ID/CFD	THOC6
Corpus Callosum, Agenesis of, with Mental Retardation, Ocular Coloboma, and Micrognathia	300472	ID/CFD	IGBP1
Craniofacial Dysmorphism, Skeletal Anomalies, and Mental Retardation Syndrome	213980	ID/CFD	TMCO1
Desbuquois Dysplasia 2	615777	ID/CFD	XYLT1
Ehlers-Danlos Syndrome, Progeroid Type, 1	130070	ID/CFD	B4GALT7
Hamamy Syndrome	611174	ID/CFD	IRX5
Immunodeficiency-centromeric Instability-facial anomalies syndrome 2	614069	ID/CFD	ZBTB24
Joubert Syndrome 14	614424	ID/CFD	TMEM237
Lenz-Majewski Hyperostotic Dwarfism	151050	ID/CFD	PTDSS1
Mental Retardation, Autosomal Recessive 39	615541	ID/CFD	TTI2
Mental Retardation, Autosomal Recessive 45	615979	ID/CFD	FBXO31
Mucolipidosis II Alpha/Beta	252500	ID/CFD	GNPTAB
Noonan Syndrome 4	610733	ID/CFD	SOS1
Noonan Syndrome 8	615355	ID/CFD	RIT1
Orofaciodigital Syndrome V	174300	ID/CFD	DDX59
Otofaciocervical Syndrome 1	166780	ID/CFD	EYA1
Otofaciocervical Syndrome 2	615560	ID/CFD	PAX1
Shprintzen-Goldberg Craniosyno-stosis Syndrome	182212	ID/CFD	SKI
Skeletal Defects, Genital Hypoplasia, and Mental Retardation	612447	ID/CFD	ZBTB16
Xia-Gibbs Syndrome	615829	ID/CFD	AHDC1
Cerebellar Ataxia, Mental Retardation, and Dysequilibrium Syndrome 2	610185	ID/CFD/NLF	WDR81
Hurler Syndrome	607014	ID/CFD/NLF	IDUA
Mannosidosis, Alpha B, Lysosomal	248500	ID/CFD/NLF	MAN2B1
Spastic Paraplegia 50, Autosomal Recessive	612936	ID/CFD/NLF	AP4M1
Cerebellar Ataxia, Mental Retardation, and Dysequilibrium Syndrome 3	613227	ID/NLF	CA8
Cerebellar Ataxia, Mental Retardation, and Dysequilibrium Syndrome 4	615268	ID/NLF	ATP8A2
Cowchock Syndrome	310490	ID/NLF	AIFM1
Homocystinuria-megaloblastic Anemia, cb1E Complementation Type	236270	ID/NLF	MTRR
Lesch-Nyhan Syndrome	300322	ID/NLF	HPRT1
Mitochondrial Complex III Deficiency, Nuclear Type 4	615159	ID/NLF	UQCRQ
Mental Retardation, Autosomal Recessive 1	249500	ID/NLF	PRSS12
Mental Retardation, Autosomal Recessive 40	615599	ID/NLF	TAF2
Pyruvate Dehydrogenase E2 Deficiency	245348	ID/NLF	DLAT
Spastic Paraplegia 10, Autosomal Dominant	604187	ID/NLF	KIF5A
Spastic Paraplegia 55, Autosomal Recessive	615035	ID/NLF	C12orf65
Spastic Paraplegia 64, Autosomal Recessive	615683	ID/NLF	ENTPD1
Spinocerebellar Ataxia, Autosomal Recessive 14	615386	ID/NLF	SPTBN2
Urocanase Deficiency	276880	ID/NLF	UROC1
Camptodactyly, Tall Stature, and Hearing Loss Syndrome	610474	ID/SFD	FGFR3
Chondrodys-plasia Punctata 1, X-linked Recessive	302950	ID/SFD	ARSE
Coloboma, Ocular, with or without Hearing Impairment, Cleft Lip/Palate, and/or Mental Retardation	120433	ID/SFD	YAP1
Congenital Disorder of Glycosylation, Type IId	607091	ID/SFD	B4GALT1
Frontonasal Dysplasia 2	613451	ID/SFD	ALX4
Kahrizi Syndrome	612713	ID/SFD	SRD5A3
Mental Retardation, Enteropathy, Deafness, Peripheral Neuropathy, Ichthyosis, and Keratoderma	609313	ID/SFD	AP1S1
Mental Retardation, X-linked 93	300659	ID/SFD	BRWD3
Microcephaly 8, Primary, Autosomal Recessive	614673	ID/SFD	CEP135
Shaheen Syndrome	615328	ID/SFD	COG6
Congenital Cataracts, Facial Dysmorphism, and Neuropathy	604168	ID/SFD/NLF	CTDP1
Muscular Dystrophy-Dystroglycanopathy (Congenital with Mental Retardation), Type B, 2	613156	ID/SFD/NLF	POMT2
Muscular Dystrophy-Dystroglycano-pathy (Congenital with Mental Retardation), Type B, 6	608840	ID/SFD/NLF	LARGE
Spastic Paraplegia 54, Autosomal Recessive	615033	ID/SFD/NLF	DDHD2
Alacrima, Achalasia, and Mental Retardation Syndrome	615510	ID/NONE	GMPPA
Bardet-Biedl Syndrome 7	615984	ID/NONE	BBS7
Bartter Syndrome, Type 3	607364	ID/NONE	CLCNKB
Emery-Dreifuss Muscular Dystrophy 1, X-linked	310300	ID/NONE	EMD
Feingold Syndrome 2	614326	ID/NONE	MIR17HG
Formiminotrans-ferase Deficiency	229100	ID/NONE	FTCD
Intrinsic Factor Deficiency	261000	ID/NONE	GIF
Joubert Syndrome 15	614464	ID/NONE	CEP41
Joubert Syndrome 17	614615	ID/NONE	C5orf42
Mental Retardation, Autosomal Recessive 2	607417	ID/NONE	CRBN
Mental Retardation, Autosomal Recessive 36	615286	ID/NONE	ADAT3
Mental Retardation, Autosomal Recessive 43	615817	ID/NONE	KIAA1033
Mental Retardation, Truncal Obesity, Retinal Dystrophy, and Micropenis	610156	ID/NONE	INPP5E
Microcephaly 4, Primary, Autosomal Recessive	604321	ID/NONE	CASC5
Orotic Aciduria	258900	ID/NONE	UMPS
Renal Tubular Acidosis, Proximal, with Ocular Abnormalities and Mental Retardation	604278	ID/NONE	SLC4A4

## Sheet: Table_2
Table 2. Number of probands studied per condition in the broader autism group, general comorbidity
rates of autism with a given condition, and supporting references for those rates. Full references are
listed following the table.
Condition	OMIM#	Subgroup	N (total number of probands)	% Autism Comorbidity & Supporting Refs
CHARGE Syndrome	214800	AUT/CFD	10	60% [1]
Cohen Syndrome	216550	AUT/CFD	45	49% [2]
Glass Syndrome	612313	AUT/CFD	7	29% [3]
Fragile X Mental Retardation Syndrome	300624	AUT/CFD	64	45% [4]
Helsmoortel-Van der AA Syndrome	615873	AUT/CFD	11	100% [5-6]
Kleefstra Syndrome	610253	AUT/CFD	20	"most" – unspecified [7]
Lujan-Fryns Syndrome	309520	AUT/CFD	32	≤ 62% [8]
Mental Retardation with Language Impairment and with or without Autistic Features	613670	AUT/CFD	4	75% [9]
Mental Retardation, Autosomal Dominant 1	156200	AUT/CFD	14	100% [10]
Mental Retardation, Autosomal Dominant 23	615761	AUT/CFD	7	≤ 71% [11]
Mental Retardation, Autosomal Dominant 24	615828	AUT/CFD	4	75% [12]
Mental Retardation, Autosomal Dominant 30	616083	AUT/CFD	7	29% [13]
Mental Retardation, X-linked, Syndromic 14	300676	AUT/CFD	8	50% [14]
Mental Retardation, X-linked, Syndromic, Wu Type	300699	AUT/CFD	6	32% [15]
Mowat-Wilson Syndrome	235730	AUT/CFD	6	40% [16]
Mucopolysaccharidosis, Type IIIA	252900	AUT/CFD	73	29% [17]
Nicolaides-Baraitser Syndrome	601358	AUT/CFD	18	28% [18]
Phelan-McDermid Syndrome	606232	AUT/CFD	130	52% [19-20]
Schaaf-Yang Syndrome	615547	AUT/CFD	6	100% [21-22]
Smith-Magenis Syndrome	182290	AUT/CFD	26	90% [23]
Temtamy Syndrome	218340	AUT/CFD	10	100% [24]
Wiedemann-Steiner Syndrome	605130	AUT/CFD	6	33% [25]
Adenylosuccinase Deficiency	103050	AUT/CFD/NLF	8	38% [26]
Alpha-thalassemia/Mental Retardation Syndrome, X-linked	301040	AUT/CFD/NLF	73	27% [27]
Angelman Syndrome	105830	AUT/CFD/NLF	39	79% [28-29]
Cardiofaciocutaneous Syndrome 1	115150	AUT/CFD/NLF	15	20% [30]
Cerebral Creatine Deficiency 1	300352	AUT/CFD/NLF	28	68% [31]
Cornelia de Lange Syndrome	122470	AUT/CFD/NLF	34	62% [32]
Lubs X-linked Mental Retardation Syndrome (MECP2 Duplication Syndrome included)	300260	AUT/CFD/NLF	18	100% [33]
Marshall-Smith Syndrome	602535	AUT/CFD/NLF	6	83% [34]
Mental Retardation, X-linked 98	300912	AUT/CFD/NLF	7	43% [35]
Mental Retardation, X-linked, Syndromic, Christianson Type	300243	AUT/CFD/NLF	9	89% [6]
Myhre Syndrome	139210	AUT/CFD/NLF	8	25% [36]
Pitt-Hopkins Syndrome	610954	AUT/CFD/NLF	8	75% [34]
Renpenning Syndrome 1	309500	AUT/CFD/NLF	13	38% [37]
Smith-Lemli-Opitz Syndrome	270400	AUT/CFD/NLF	14	75% [38]
Tritchothiodystrophy 4, Nonphoto-sensitive	234050	AUT/CFD/NLF	5	60% [39]
Warburg Micro Syndrome 4	615663	AUT/CFD/NLF	7	100% [40]
Cerebral Creatine Deficiency Syndrome 2	612736	AUT/NLF	7	43% [41]
Epileptic Encephalopathy, Early Infantile, 4	612164	AUT/NLF	7	29% [42]
Epileptic Encephalopathy, Early Infantile, 6	607208	AUT/NLF	37	24% [43]
Myotonic Dystrophy 1	160900	AUT/NLF	57	49% [44]
Neurodegeneration due to Cerebral Folate Transport Deficiency	613068	AUT/NLF	20	35% [45]
Rett Syndrome	312750	AUT/NLF	35	100% [46]
Rett Syndrome, Congenital	613454	AUT/NLF	26	100% [47]
Arthrogryposis, Mental Retardation, and Seizures	615553	AUT/SFD	8	100% [48]
Mental Retardation, Autosomal Recessive 38	615516	AUT/SFD	7	86% [49]
Mental Retardation, X-linked 72	300271	AUT/SFD	9	33% [50]
Lowe Oculocerebral Syndrome 1	309000	AUT/SFD/NLF	52	71% [51]
Norrie Disease	310600	AUT/SFD/NLF	56	27% [52]
Tuberous Sclerosis 2	613254	AUT/SFD/NLF	103	40% [53]
Brunner Syndrome	300615	AUT/NONE	7	71% [54-55]
Cerebral Creatine Deficiency Syndrome 3	612718	AUT/NONE	20	35% [56]
Epileptic Encephalopathy, Childhood Onset	615369	AUT/NONE	6	50% [57]
Epileptic Encephalopathy, Early Infantile, 24	615871	AUT/NONE	6	66% [58]
Epileptic Encephalopathy, Early Infantile, 9	300088	AUT/NONE	27	22% [59]
Mental Retardation, Autosomal Dominant 5	612621	AUT/NONE	10	60% [60-62]
Mental Retardation, Autosomal Recessive 3	608443	AUT/NONE	16	31% [63]
Muscular Dystrophy-Dystroglycanopathy (Congenital with Mental Retardation), Type B, 3 (Muscle-eye-brain disease)	613151	AUT/NONE	9	22% [64]
References for Table 2:
1. Smith IM, Nichols SL, Issekutz K, Blake K; Canadian Paediatric Surveillance Program. 2005. Behavioral profiles and symptoms of autism in CHARGE syndrome: preliminary Canadian epidemiological data. Am J Med Genet 133A: 248-256.
2. Howlin P, Karpf J, Turk J. 2005. Behavioural characteristics and autistic features in individuals with Cohen syndrome. Eur. Child. Adolesc. Psychiatry 14: 57-64.
3. Balasubramanian M, Smith K, Basel-Vanagaite L, Feingold MF, Brock P, Gowans GC, et al. 2011. Case series: 2q33.1 microdeletion syndrome—further delineation of the phenotype. J Med Genet 48: 290-298.
4. Clifford S, Dissanayake C, Bui QM, Huggins R, Taylor AK, Loesch DZ. 2007. Autism spectrum phenotype in males and females with fragile X full mutation and permutation. J Autism Dev Disord 37: 738-747.
5. Helsmoortel C, Vulto-van Silfhout AT, Coe BP, Vandeweyer G, Rooms L, van den Ende J, et al. 2014. A SWI/SNF-related autism syndrome caused by de novo mutations in ADNP. Nat Genet 46: 380-384.
6. Pescosolido MF, Schwede M, Johnson Harrison A, Schmidt M, Gamsiz ED, Chen WS, et al. 2014. Expansion of the clinical phenotype associated with mutations in activity-dependent neuroprotective protein. J Med Genet 51: 587-589.
7. Willemsen MH, Vulto-van Silfhout AT, Nillesen WM, Wissink-Lindhout WM, van Bokhoven H, Philip N, Berry-Kravis EM, Kini U, van Ravenswaaij-Arts CM, Delle Chiaie B, et al. 2012. Update on Kleefstra syndrome. Mol Syndromol 2: 202-212.
8. Williams MS. 2006. Neuropsychological evaluation in Lujan-Fryns syndrome: commentary and clinical report. Am J Med Genet A 15: 2812-2825.
9. Le Fevre AK, Taylor S, Malek NH, Horn D, Carr CW, Abdul-Rahman OA, et al. 2013. FOXP1 mutations cause intellectual disability and a recognizable phenotype. Am J Med Genet A 161A: 3166-3175.
10. Talkowski ME, Mullegama SV, Rosenfeld JA, van Bon BW, Shen Y, Repnikova EA, Gastier-Foster J, Thrush DL, Kathiresan S, Ruderfer DM, et al. 2011. Assessment of 2q23.1 microdeletion syndrome implicates MBD5 as a single causal locus of intellectual disability, epilepsy, and autism spectrum disorder. Am J Hum Genet 89: 551-563.
11. Grozeva D, Carss K, Spasic-Boskovic O, Parker MJ, Archer H, Firth HV, Park SM, Canham N, Holder SE, Wilson M, et al. 2014. De novo loss-of-function mutations in SETD5, encoding a methyltransferase in a 3p25 microdeletion syndrome critical region, cause intellectual disability. Am J Hum Genet 94: 618-624.
12. Vulto-van Silfhout AT, Rajamanickam S, Jensik PJ, Vergult S, de Rocker N, Newhall KJ, et al. 2014. Mutations affecting the SAND domain of DEAF1 cause intellectual disability with severe speech impairment and behavioral problems. Am J Hum Genet 94: 649-661.
13. Coe BP, Witherspoon K, Rosenfeld JA, van Bon BW, Vulto-van Silfhout AT, Bosco P, et al. 2014. Refining analyses of copy number variation identifies specific genes associated with developmental delay. Nat Genet 46: 1063-1071.
14. Tarpey PS, Raymond FL, Nguyen LS, Rodriguez J, Hackett A, Vandeleur L, Smith R, Shoubridge C, Edkins S, Stevens S, et al. 2007. Mutations in UPF3B, a member of the nonsense-mediated mRNA decay complex, cause syndromic and nonsyndromic mental retardation. Nat Genet 39: 1127-1133.
15. Philips AK, Sirén A, Avela K, Somer M, Peippo M, Ahvenainen M, et al. 2014. X-exome sequencing in Finnish families with intellectual disability—four novel mutations and two novel syndromic phenotypes. Orphanet J Rare Dis 9: 49.
16. Evans E, Einfeld S, Mowat D, Taffe J, Tonge B, Wilson M. 2012. The behavioral phenotype of Mowat-Wilson syndrome. Am J Med Genet A 158A: 358-366.
17. Héron B, Mikaeloff Y, Froissart R, Caridade G, Maire I, Caillaud C, et al. 2011. Incidence and natural history of mucopolysaccharidosis type III in France and comparison with United Kingdom and Greece. Am J Med Genet A 155A: 58-68.
18. Sousa SB, Abdul-Rahman OA, Bottani A, Cormier-Daire V, Fryer A, Gillessen-Kaesbach G, Horn D, Josifova D, Kuechler A, Lees M, et al. 2009. Nicolaides-Baraitser syndrome: delineation of the phenotype. Am J Med Genet A 149A: 1628-1640.
19. Phelan MC, Rogers RC, Saul RA, Stapleton GA, Sweet K, McDermid H, et al. 2001. 22q13 deletion syndrome. Am J Med Genet 101: 91-99.
20. Cusmano-Ozog K, Manning MA, Hoyme HE. 2007. Am J Med Genet C Semin Med Genet 145C: 393-398.
21. Schaaf CP, Gonzalez-Garay ML, Xia F, Potocki L, Gripp KW, Zhang B, Peters BA, McElwain MA, Drmanac R, Beaudet AL, et al. 2013. Truncating mutations MAGEL2 cause Prader-Willi phenotypes and autism. Nat Genet 45: 1405-1408.
22. Soden SE, Saunders C, Willig LK, Farrow EG, Smith LD, Petrikin JE, et al. 2014. Effectiveness of exome and genome sequencing guided by acuity of illness for diagnosis of neurodevelopmental disorders. Sci Transl Med 6: 265ra168.
23. Laje G, Morse R, Richter W, Ball J, Pao M, Smith AC. 2010. Autism spectrum features in Smith-Magenis syndrome. Am J Med Genet C Semin Med Genet 154C: 456-462.
24. Akizu N, Shembesh NM, Ben-Omran T, Bastaki L, Al-Tawari A, Zaki MS, Koul R, Spencer E, Rosti RO, Scott E, Nickerson E, et al. 2013. Whole-exome sequencing identifies mutated c12orf57 in recessive corpus callosum hypoplasia. Am J Hum Genet 92: 392-400.
25. Jones WD, Dafou D, McEntagart M, Woollard WJ, Elmslie FV, Holder-Espinasse M, et al. 2012. De novo mutations in MLL cause Wiedemann-Steiner Syndrome. Am J Hum Genet 91: 358-364.
26. Jaeken J, Wadman SK, Duran M, van Sprang FJ, Beemer FA, Holl RA, et al. 1988. Adenylosuccinase deficiency: an inborn error of purine nucleotide synthesis. Eur J Pediatr 148: 126-131.
27. Wada T, Gibbons RJ. 2003. ATR-X syndrome. In: Genetics and Genomics of Neurobehavioral Disorders. (ed. Fish GS). Humana Press: Totowa, NJ, pp. 309-334.
28. Bonati MT, Russo S, Finelli P, Valsecchi MR, Cogliati F, Cavalleri F, Roberts W, Elia M, Larizza L. 2007. Evaluation of autism traits in Angelman syndrome: a resource to unfolding autism genes. Neurogenetics 8: 169-178.
29. Trillingsgaard A, ØStergaard JR. 2004. Autism in Angelman syndrome: an exploration of comorbidity. Autism 8: 163-174.
30. Nava C, Hanna N, Michot C, Pereira S, Pouvreau N, Niihori T, et al. 2007. Cardio-facio-cutaneous and Noonan syndromes due to mutations in the RAS/MAPK signaling pathway: genotype-phenotype relationships and overlap with Costello syndrome. J Med Genet 44: 763-771.
31. Dunbar M, Jaggumantri S, Sargent M, Stockler-Ipsiroglu S, van Karnebeek CD. 2014. Treatment of X-linked creatine transporter (SLC6A8) deficiency: systematic review of the literature and three new cases. Mol Genet Metab 112: 259-274.
32. Moss, JF, Oliver C, Berg K, Kaur G, Jephcott L, Cornish K. 2008. Prevalence of autism spectrum phenomenology in Cornelia de Lange and Cru du Chat syndromes. Am J Ment Retard 113: 278-291.
33. Ramocki MB, Peters SU, Tavyev YJ, Zhang F, Carvalho CM, Shaaf CP, Richman R, Fang P, Glaze DG, Lupski JR, et al. 2009. Autism and other neuropsychiatric symptoms are prevalent in individuals with MeCP2 duplication syndrome. Ann Neurol 66: 771-782.
34. van Balkom ID, Shaw A, Vuijk PJ, Franssens M, Hoek HW, Hennekam RC. 2011. Development and behavior in Marshall-Smith syndrome: an exploratory study of cognition, phenotype and autism. J Intellect Disabil Res 55: 973-987.
35. van Maldergem L, Hou Q, Kalscheuer V, Rio M, Doco-Fenzy M, Medeira A, de Brouwer AP, Cabrol C, Haas SA, Cacciagli P, et al. 2013. Loss of function of KIAA2022 causes mild to severe intellectual disability with an autism spectrum disorder and impairs neurite outgrowth. Hum Mol Genet 22: 3306-3314.
36. Caputo V, Cianetti L, Niceta M, Carta C, Ciolfi A, Bocchinfuso G, Carrani E, Dentici ML, Biamino E, Belligni E, et al. 2012. A restricted spectrum of mutations in the SMAD4 tumor-suppressor gene underlies Myhre syndrome. Am J Hum Genet 90: 161-169. 16: 382-286.
37. Germanaud D, Rossi M, Bussy G, Gérard D, Hertz-Pannier L, Blanchet P, Dollfus H, Giuliano F, Bennouna-Greene V, Sarda P, et al. 2011. The Renpenning syndrome spectrum: new clinical insights supported by 13 new PQBP1-mutated males. Clin Genet 79: 225-235.
38. Sikora DM, Pettit-Kekel K, Penfield J, Merkens LS, Steiner RD. 2006. The near universal presence of autism spectrum disorders in children with Smith-Lemli-Opitz syndrome. Am J Med Genet A 140: 1511-1518.
39. Heller ER, Khan SG, Kuschal C, Tamura D, DiGiovanna JJ, Kraemer KH. 2015. Mutations in the TTDN1 gene are associated with a distinct trichothiodystrophy phenotype. J Invest Dermatol 135: 734-741.
40. Liegel RP, Handley MT, Ronchetti A, Brown S, Langemeyer L, Linford A, et al. 2013. Loss-of-function mutations in the TBC1D20 cause cataracts and male infertility in blind sterile mice and Warburg micro syndrome in humans. Am J Hum Genet 93: 1001-1014.
41. Cheillan D, Joncquel-Chevalier Curt M, Briand G, Salomons GS, Mention-Mulliez K, Dobbelaere D, Cuisset JM, Lion-François L, Portes VD, Chabli A, et al. 2012. Screening for primary creatine deficiencies in French patients with unexplained neurological symptoms. Orphanet J Rare Dis 7: 96.
42. Barcia G, Chemaly N, Gobin S, Milh M, Van Bogaert P, Barnerias C, Kaminska A, Dulac O, Desguerre I, Cormier V, et al. 2014. Early epileptic encephalopathies associated with STXBP1 mutations: Could we better delineate the phenotype? Eur J Med Genet 57: 15-20.
43. Li BM, Liu XR, Yi YH, Deng YH, Su T, Zou X, Liao WP. 2011. Autism in Dravet syndrome: prevalence, features, and relationship to the clinical characteristics of epilepsy and mental retardation. Epilepsy Behav 21: 291-295.
44. Ekström AB, Hakenäs-Plate L, Samuelsson L, Tulinius M, Wentz E. 2008. Autism spectrum conditions in myotonic dystrophy type 1: a study on 57 individuals with congenital and childhood forms. Am J Med Genet B Neuropsychiatr Genet 147B: 918-926.
45. Ramaekers V, Blau N. 2004. Cerebral folate deficiency. Dev Med Child Neurol 46: 843-851.
46. Hagberg B, Aicardi J, Dias K, Ramos O. 1983. A progressive syndrome of autism, dementia, ataxia, and loss of purposeful hand use in girls: Rett’s syndrome: report of 35 cases. Ann Neurol 14: 471-479.
47. Kortüm F, Das S, Flindt M, Morris-Rosendahl DJ, Stefanova I, Goldstein A, Horn D, Klopocki E, Kluger G, Martin P, et al. 2011. The core FOXG1 syndrome phenotype consists of postnatal microcephaly, severe mental retardation, absent language, dyskinesia, and corpus callosum hypogenesis. J Med Genet 48: 396-406.
48. Edvardson S, Ashikov A, Jalas C, Sturiale L, Shaag A, Fedick A, Treff NR, et al. 2013. Mutations in SLC35A3 cause autism spectrum disorder, epilepsy and arthrogryposis. J Med Genet 50: 733-739.
49. Puffenberger EG, Jinks RN, Wang H, Xin B, Fiorentini C, Sherman EA, Degrazio D, Shaw C, Sougnez C, Cibulskis K., et al. 2012. A homozygous missense mutation in HERC2 associated with global developmental delay and autism spectrum disorder. Hum Mutat 33: 1639-1646.
50. Russo S, Cogliati F, Cavalleri F, Cassitto MG, Giglioli R, Toniolo D, et al. 2000. Mapping to distal Xq28 of nonspecific X-linked mental retardation MRX72: linkage analysis and clinical findings in a three-generation Sardinian family. Am J Med Genet 94: 376-382.
51. Oliver C, Berg K, Moss J, Arron K, Burbidge C. 2011. Delineation of behavioral phenotypes in genetic syndromes: characteristics of autism spectrum disorder, affect and hyperactivity. J Autism Dev Disord 41: 1019-1032.
52. Smith SE, Mullen TE, Graham D, Sims KB, Rehm HL. 2012. Norrie disease: extraocular clinical manifestations in 56 patients. Am J Med Genet 158A: 1909-1917.
53. Numis AL, Major P, Montenegro MA, Muzykewicz DA, Pulsifer MB, Thiele EA. 2011. Identification of risk factors for autism spectrum disorders in tuberous sclerosis complex. Neurology 76: 981-987.
54. Piton A, Poquet H, Redin C, Masurel A, Lauer J, Muller J, et al. 2014. 20 ans après: a second mutation in MAOA identified by targeted high-throughput sequencing in a family with altered behavior and cognition. Eur J Hum Genet 22: 776-783.
55. Palmer EE, Leffler M, Rogers C, Shaw M, Carroll R, Earl J, et al. 2016. New insights into Brunner syndrome and potential for targeted therapy. Clin Genet 89: 120-127.
56. Mercimek-Mahmutoglu S, Ndika J, Kanhai W, de Villemeur TB, Cheillan D, Christensen E, et al. 2014. Thirteen new patients with guanidioacetate methyltransferase deficiency and functional characterization of nineteen novel missense variants in the GAMT gene. Hum Mutat 35: 462-469.
57. Chénier S, Yoon G, Argiropoulos B, Lauzon J, Laframboise R, Ahn JW, Ogilvie CM, Lionel AC, Marshall CR, Vaags AK, et al. 2014. CHD2 haploinsufficiency is associated with developmental delay, intellectual disability, epilepsy and neurobehavioural problems. J Neurodev Disord 6: 9.
58. Nava C, Dalle C, Rastetter A, Striano P, de Kovel CG, Nabbout R, Cancès C, Ville D, Brilstra EH, Gobbi G, et al. 2014. De novo mutations in HCN1 cause early infantile epileptic encephalopathy. Nat Genet 46: 640-645.
59. Scheffer IE, Turner SJ, Dibbens LM, Bayly MA, Friend K, Hodgson B, Burrows L, Shaw M, Wei C, Ullmann R, et al. 2008. Epilepsy and mental retardation limited to females: an under-recognized disorder. Brain 131: 918-927.
60. Hamdan FF, Daoud H, Piton A, Gauthier J, Dobrzeniecka S, Krebs MO, et al. 2011. De novo SYNGAP1 mutations in nonsyndromic intellectual disability and autism. Biol Psychiatry 69: 898-901.
61. Carvill GL, Heavin SB, Yendle SC, McMahon JM, O’Roak BJ, Cook J, et al. 2013. Targeted resequencing in epileptic encephalopathies identifies de novo mutations in CHD2 and SYNGAP1. Nat Genet 45: 825-830.
62. Berryer MH, Hamdan FF, Klitten LL, Møller RS, Carmant L, Schwartzentruber J, et al. 2013. Mutations in SYNGAP1 cause intellectual disability, autism, and a specific form of epilepsy by inducing haploinsufficiency. Hum Mutat 34: 385-394.
63. Manzini MC, Xiong L, Shaheen R, Tambunan DE, Di Costanzo S, Mitisalis V, Tischfield DJ, Cinquino A, Ghaziuddin M, Christian M, et al. 2014. CC2D1A regulated human intellectual and social function as well as NF-κB signaling homeostasis. Cell Rep 8: 647-655.
64. Hehr U, Uyanik G, Gross C, Walter MC, Bohring A, Cohen M, Oehl-Jaschkowitz B, Bird LM, Shamdeen GM, Bogdahn U, et al. 2007. Novel POMGnT1 mutations define broader phenotypic spectrum of muscle-eye-brain disease. Neurogenetics 8: 279-288.

## Sheet: Table_3
Table 3. Number of probands studied per condition in the broader epilepsy group, general comorbidity rates
of epilepsy with a given condition, and supporting references for those rates. Full references are listed
following the table.
Condition	OMIM#	Subgroup	N (total number of probands)	% Epilepsy Comorbidity & Supporting Refs
Acromelic Frontonasal Dysostosis	603671	EPI/CFD	11	27% [1-2]
Bohring-Opitz Syndrome	605039	EPI/CFD	6	45% [3-4]
CK Syndrome	300831	EPI/CFD	11	100% [5]
Cutis Laxa, Autosomal Recessive, Type IIA	219200	EPI/CFD	10	30% [6]
Hyperphosphatasia with Mental Retardation Syndrome 4	615716	EPI/CFD	5	80% [7]
Hypoparathyroidism-retardation-dysmorphism Syndrome	241410	EPI/CFD	12	100% [8]
Koolen-De Vries Syndrome	610443	EPI/CFD	22	50% [9]
Mandibulofacial Dysostosis, Guion-Almeida Type	610536	EPI/CFD	12	42% [10]
Mental Retardation, Autosomal Recessive 41	615637	EPI/CFD	9	33% [11]
Mental Retardation, X-linked 30	300558	EPI/CFD	20	30% [12-14]
Mental Retardation, X-linked, Syndromic, Snyder-Robinson Type	309583	EPI/CFD	9	66% [15]
Microcephaly, Short Stature, and Impaired Glucose Metabolism	616033	EPI/CFD	6	66% [16-17]
Psychomotor Retardation, Epilepsy, and Craniofacial Dysmorphism	614501	EPI/CFD	3	100% [18]
Seckel Syndrome 1	210600	EPI/CFD	6	66% [19-21]
Aspartylglucosaminuria	208400	EPI/CFD/NLF	78	28% [22]
Baraitser-Winter Syndrome 1	243310	EPI/CFD/NLF	9	100% [23]
Coloboma, Congenital Heart Disease, Ichthyosiform Dermatosis, Mental Retardation, and Ear Anomalies Syndrome	280000	EPI/CFD/NLF	3	100% [24-26]
Congenital Disorder of Glycosylation, Type Ie	608799	EPI/CFD/NLF	8	100% [27-31]
Congenital Disorder of Glycosylation, Type IIa	212066	EPI/CFD/NLF	7	57% [32-34]
Cutis Laxa, Autosomal Recessive, Type IIIA	219150	EPI/CFD/NLF	10	23% [35-43]
Desmosterolosis	602398	EPI/CFD/NLF	6	66% [44-46]
Galactosialidosis	256540	EPI/CFD/NLF	5	60% [47-49]
Leukoencephalopathy, Cystic, without Megalencephaly	612951	EPI/CFD/NLF	15	53% [50]
Megalencephaly-polymicrogyria-polydactyly-hydrocephalus Syndrome 1	603387	EPI/CFD/NLF	7	71% [51-53]
Mental Retardation, X-linked, Syndromic, Cabezas Type	300354	EPI/CFD/NLF	11	73% [54]
Microcephaly, Progressive, with Seizures and Cerebral and Cerebellar Atrophy	615760	EPI/CFD/NLF	4	100% [55]
Microhydranencephaly	605013	EPI/CFD/NLF	10	70% [56-57]
Mitochondrial DNA Depletion Syndrome 13 (Encephalomyopathic Type)	615471	EPI/CFD/NLF	9	78% [58]
Multiple Congenital Anomalies-hypotonia-seizures Syndrome 2	300868	EPI/CFD/NLF	13	100% [59-62]
Pontocerebellar Hypoplasia, Type 10	615803	EPI/CFD/NLF	19	95% [63-64]
Pseudo-TORCH Syndrome 1	251290	EPI/CFD/NLF	4	100% [65]
Pyruvate Dehydrogenase E1-alpha Deficiency	312170	EPI/CFD/NLF	93	27% [66]
Spastic Paraplegia 49, Autosomal Recessive	615031	EPI/CFD/NLF	5	40% [67]
Vici Syndrome	242840	EPI/CFD/NLF	18	56% [68]
Warburg Micro Syndrome 3	614222	EPI/CFD/NLF	12	42% [69]
Alternating Hemiplegia of Childhood 1	104290	EPI/NLF	8	60% [70-71]
Alternating Hemiplegia of Childhood 2	614820	EPI/NLF	30	54% [72]
Argininemia	207800	EPI/NLF	14	93% [73]
Ceroid Lipofuscinosis, Neuronal, 1	256730	EPI/NLF	8	63% [74-75]
Congenital Disorder of Glycosylation, Type Ic	603147	EPI/NLF	8	100% [76]
Cortical Dysplasia, Complex, with Other Brain Malformations 1	614039	EPI/NLF	9	22% [77]
Cortical Dysplasia, Complex, with Other Brain Malformations 2	615282	EPI/NLF	5	100% [78-79]
Encephalopathy, Acute, Infection-induced, Susceptibility to, 3	608033	EPI/NLF	19	59% [80]
Epilepsy, Progressive Myoclonic, 3, with or without Intracellular Inclusions	611726	EPI/NLF	9	100% [81]
Epileptic Encephalopathy, Early Infantile, 5	613477	EPI/NLF	5	100% [82-85]
Epileptic Encephalopathy, Early Infantile, 7	613720	EPI/NLF	8	100% [86]
Epileptic Encephalopathy, Early Infantile, 8	300607	EPI/NLF	3	66% [87-89]
GLUT1 Deficiency Syndrome 1	606777	EPI/NLF	15	100% [90]
Homocystinuria-megaloblastic Anemia, cb1G Complementation Type	250940	EPI/NLF	8	33% [91-96]
Hyperphosphatasia with Mental Retardation Syndrome 3	614207	EPI/NLF	5	60% [97-98]
Ichthyosis, Spastic Quadriplegia, and Mental Retardation	614457	EPI/NLF	2	100% [99]
Leukodystrophy, Hypomyelin-ating, 5	610532	EPI/NLF	10	30% [100]
Malonyl-CoA Decarboxylase Deficiency	248360	EPI/NLF	7	57% [101]
Megaloblastic Anemia due to Dihydrofolate Reductase Deficiency	613839	EPI/NLF	6	100% [102-103]
Microcephaly 2, Primary, Autosomal Recessive, with or without Cortical Malformations	604317	EPI/NLF	9	56% [104]
Microcephaly, Seizures, and Developmental Delay	613402	EPI/NLF	11	100% [105]
Neurodegeneration with Brain Iron Accumulation 5	300894	EPI/NLF	5	80% [106]
Pelizaeus-Merzbacher Disease	312080	EPI/NLF	8	38% [107-108]
Phosphoglycerate Dehydrogenase Deficiency	601815	EPI/NLF	7	100% [109-110]
Polymicrogyria with Seizures	614833	EPI/NLF	4	100% [111]
Pontocerebellar Hypoplasia, Type 2D	613811	EPI/NLF	7	≥ 43% [112-113]
Pontocerebellar Hypoplasia, Type 2E	615851	EPI/NLF	20	20% [114]
Salt and Pepper Developmental Regression Syndrome	609056	EPI/NLF	20	100% [115]
Schindler Disease, Type 1	609241	EPI/NLF	11	27% [116]
Spinocerebellar Ataxia, Autosomal Recessive 13	614831	EPI/NLF	10	30% [117]
Thiamine Metabolism Dysfunction Syndrome 2 (Biotin- or Thiamine-responsive Type)	607483	EPI/NLF	9	56% [118]
Epileptic Encephalopathy, Early Infantile, 18	615476	EPI/SFD	2	100% [119]
Microcephaly 5, Primary, Autosomal Recessive	608716	EPI/SFD	11	27% [120]
Congenital Disorder of Glycosylation, Type Is	300884	EPI/SFD/NLF	4	100% [79, 121-122]
D-2-Hydroxyglutaric Aciduria 1	600721	EPI/SFD/NLF	8	88% [123]
Hypermethioninemia due to Adenosine Kinase Deficiency	614300	EPI/SFD/NLF	6	100% [124]
Pyruvate Dehydrogenase E3-binding Protein Deficiency	245349	EPI/SFD/NLF	20	20% [114]
Spastic Paraplegia 18, Autosomal Recessive	611225	EPI/SFD/NLF	13	77% [125-126]
Spinocerebellar Ataxia, Autosomal Recessive 12	614322	EPI/SFD/NLF	6	100% [127-128]
Cortical Dysplasia, Complex, with Other Brain Malformations 5	615763	EPI/NONE	2	100% [129]
Epileptic Encephalopathy, Early Infantile, 19	615744	EPI/NONE	4	100% [130]
Epilepsy, Nocturnal Frontal Lobe, 5	615005	EPI/NONE	15	100% [131]
Hydrocephalus, Nonsyndromic, Autosomal Recessive 1	236600	EPI/NONE	10	50% [132-133]
Hyperlysinemia, Type I	238700	EPI/NONE	8	44% [134]
Hyperprolinemia, Type II	239510	EPI/NONE	15	73% [135-136]
Mental Retardation, X-linked 96	300802	EPI/NONE	"some"	? [137]
Muscular Dystrophy-Dystroglycanopathy (Congenital with Mental Retardation), Type B, 14	615351	EPI/NONE	8	50% [138]
Polymicrogyria with Optic Nerve Hypoplasia	613180	EPI/NONE	4	100% [139]
References for Table 3:
1. Slaney SF, Goodman FR, Eilers-Walsman BL, Hall BD, Williams DK, Young ID, et al. 1999. Acromelic frontonasal dysostosis. Am J Med Genet 83: 109-116.
2. Smith JD, Hing AV, Clarke CM, Johnson NM, Perez FA, Park SS, et al. 2014. Exome sequencing identifies a recurrent de novo ZSWIM6 mutation associated with acromelic frontonasal dysostosis. Am J Hum Genet 95: 235-240.
3. Hoischen A, van Bon BW, Rodríguez-Santiago B, Gilissen C, Vissers LE, de Vries P, et al. 2011. De novo nonsense mutations in ASXL1 cause Bohring-Opitz syndrome. Nat Genet 26: 729-731.
4. Bohring A, Silengo M, Lerone M, Superneau DW, Spaich C, Braddock SR, et al. 1999. Severe end of Opitz trigonocephaly (C) syndrome or new syndrome? Am J Med Genet 8: 438-446.
5. McLarren KW, Severson TM, du Souich C, Stockton DW, Kratz LE, Cunningham D, et al. 2010. Hypomorphic temperature-sensitive alleles of NSDHL cause CK syndrome. Am J Hum Genet 87: 905-914.
6. Morava E, Lefeber DJ, Urban Z, de Meirleir L, Meinecke P, Gillessen-Kaesbach G, et al. 2008. Defining the phenotype in an autosomal recessive cutis laxa syndrome with a combined congenital defect of glycosylation. Eur J Hum Genet 16: 28-35.
7. Howard MF, Murakami Y, Pagnamenta AT, Daumer-Haas C, Fischer B, Hecht J, et al. 2014. Mutations in PGAP3 impair GPI-anchor maturation, causing a subtype of hyperphosphatasia with mental retardation. Am J Hum Genet 94: 278-287.
8. Sanjad SA, Sakati NA, Abu-Osba YK, Kaddoura R, Milner RD. 1991. A new syndrome of congenital hypoparathyroidism, severe growth failure, and dysmorphic features. Arch Dis Child 66: 193-196.
9. Koolen DA, Sharp AJ, Hurst JA, Firth HV, Knight SJ, Goldenberg A, et al. 2008. Clinical and molecular delineation of the 17q21.31 microdeletion syndrome. J Med Genet 45: 710-720.
10. Lines MA, Huang L, Schwartzentruber J, Douglas SL, Lynch DC, Beaulieu C, et al. 2012. Haploinsufficiency of a spliceosomal GTPase encoded by EFTUD2 causes mandibulofacial dysostosis with microcephaly. Am J Hum Genet 90: 369-377.
11. Baple EL, Maroofian R, Chioza BA, Izadi M, Cross HE, Al-Turkis S, et al. 2014. Mutations in KPTN cause macrocephaly, neurodevelopmental delay, and seizures. Am J Hum Genet 94: 87-94.
12. Gedeon AK, Nelson J, Gécz J, Mulley JC. 2003. X-linked mild non-syndromic mental retardation with neuropsychiatric problems and the missense mutation A365E in PAK3. Am J Med Genet A 120A: 509-517.
13. Peippo M, Koivisto AM, Särkämö T, Sipponen M, von Koskull H, Ylisaukko-oja T, et al. 2007. PAK3 related mental disability: further characterization of the phenotype. Am J Med Genet A 143A: 2406-2416.
14. Rejeb I, Saillour Y, Castelnau L, Julien C, Bienvenu T, Taga P, et al. 2008. A novel splice mutation in PAK3 gene underlying mental retardation with neuropsychiatric features. Eur J Hum Genet 16: 1358-1363.
15. de Alencastro G, McCloskey DE, Kliemann SE, Maranduba CM, Pegg AE, Wang X, et al. 2008. New SMS mutation leads to a striking reduction in spermine synthase protein function and a severe form of Snyder-Robinson X-linked recessive mental retardation syndrome. J Med Genet 45: 539-543.
16. Igoillo-Esteve M, Genin A, Lambert N, Désir J, Pirson I, Abdulkarim B, et al. 2013. tRNA methyltransferase homolog gene TRMT10A mutation in young onset diabetes and primary microcephaly in humans. PLoS Genet 9: e1003888.
17. Gillis D, Krishnamohan A, Yaacov B, Shaag A, Jackman JE, Elpeleg O. 2014. TRMT10A dysfunction is associated with abnormalities in glucose homeostasis, short stature and microcephaly. J Med Genet 51: 581-586.
18. Puffenberger EG, Jinks RN, Sougnez C, Cibulskis K, Willert RA, Achilly NP, et al. 2012. Genetic mapping and exome sequencing identify variants associated with five novel diseases. PLoS One 7: e28936.
19. Butler MG, Hall BD, Maclean RN, Lozzi CB. 1987. Do some patients with Seckel syndrome have hematological problems and/or chromosome breakage? Am J Med Genet 27: 645-649.
20. Capovilla G, Lorenzetti ME, Montagnin A, Borgatti R, Piccinelli P, Giordana L, et al. 2001. Seckel’s syndrome and malformations of cortical development: report of three new cases and review of the literature. J Child Neurol 16: 382-386.
21. Di Bartolomeo R, Polidori G, Piastra M, Viola L, Zampino G, Chiaretti A. 2003. Malignant hypertension and cerebral haemorrhage in Seckel syndrome. Eur J Pediatr 162: 860-862.
22. Arvio M, Oksanen V, Autio S, Gaily E, Sainio K. 1993. Epileptic seizures in aspartylgucosaminuria: a common disorder. Acta Neurol Scand 87: 342-344.
23. Rivière JB, van Bon BW, Hoischen A, Kholmanskikh SS, O’Roak BJ, Gilissen C, et al. 2012. De novo mutations in the actin genes ACTB and ACTG1 cause Baraitser-Winter syndrome. Nat Genet 44: 440-444.
24. Shashi V, Zunich J, Kelly TE, Fryburg JS. 1995. Neuroectodermal (CHIME) syndrome: an additional case with long term follow up of all reported cases. J Med Genet 32: 465-469.
25. Schnur RE, Greenbaum BH, Heymann WR, Christensen K, Buck AS, Reid CS. 1997. Acute lymphoblastic leukemia in a child with the CHIME neuroectodermal dysplasia syndrome. Am J Med Genet 72: 24-29.
26. Tinschert S, Anton-Lamprecht I, Albrecht-Nebe H, Audring H. 1996. Zunich neuroectodermal syndrome: migratory ichthyosiform dermatosis, colobomas, and other abnormalities. Pediatr Dermatol 13: 363-371.
27. Kim S, Westphal V, Srikrishna G, Mehta DP, Peterson S, Filiano J, et al. 2000. Dolichol phosphate mannose synthase (DPM1) mutations define congenital disorder of glycosylation Ie (CDG-Ie). J Clin Invest 105: 191-198.
28. Imbach T, Schenk B, Schollen E, Burda P, Stutz A, Grunewald S, et al. 2000. Deficiency of dolichol-phosphate-mannose synthase-1 causes congenital disorder of glycosylation type Ie. J Clin Invest 105: 233-239.
29. García-Silva MT, Matthijs G, Schollen E, Cabrera JC, Sanchez del Pozo J, Martí Herreros M, et al. 2004. Congenital disorder of glycosylation (CDG) type Ie. A new patient. J Inherit Metab Dis 27: 591-600.
30. Dancourt J, Vuillaumier-Barrot S, de Baulny HO, Sfaello I, Barnier A, le Bizec C, et al. 2006. A new intronic mutation in the DPM1 gene is associated with a milder form of CDG Ie in two French siblings. Pediatr Res 59: 835-839.
31. Yang AC, Ng BG, Moore SA, Rush J, Waechter CJ, Raymond KM, et al. 2013. Congenital disorder of glycosylation due to DPM1 mutations presenting with dystroglycanopathy-type congenital muscular dystrophy. Mol Genet Metab 110: 345-351.
32. Cormier-Daire V, Amiel J, Vuillaumier-Barrot S, Tan J, Durand G, Munnich A, et al. 2000. Congenital disorders of glycosylation IIa cause growth retardation, mental retardation, and facial dysmorphism. J Med Genet 37: 875-877.
33. de Cock P, Jaeken J. 2009. MGAT2 deficiency (CDG-IIa): the life of J. Biochim Biophys Acta 1792: 844-846.
34. Alkuraya FS. 2010. Mental retardation, growth retardation, unusual nose, and open mouth: an autosomal recessive entity. Am J Med Genet A 152A: 2160-2163.
35. de Barsy AM, Moens E, Dierckx L. 1968. Dwarfism, oligophrenia and degeneration of the elastic tissue in skin and cornea. A new syndrome? Helv Paediatr Acta 23: 305-313.
36. Hoefnagel D, Pomeroy J, Wurster D, Saxon A. 1971. Congenital athetosis, mental deficiency, dwarfism and laxity of skin and ligaments. Helv Paediatr Acta 26: 397-402.
37. Pontz BF, Zepp F, Stöss H. 1986. Biochemical, morphological and immunological findings in a patient with a cutis laxa-associated inborn disorder (De Barsy syndrome). Eur J Pediatr 145: 428-434.
38. Rabier D, Nuttin C, Poggi F, Padovani JP, Abdo K, Bardet J, et al. 1992. Familial joint hyperlaxity, skin hyperelasticity, cataract and mental retardation with hyperammoneia and low citrulline, ornithine and proline: a new disorder of collagen metabolism? Abstracts of Free Communications, 30th Annual Symposium Leuven, Sept. 8-11. The Society for the Study of Inborn Errors of Metabolism (SSIEM…
39. Kivuva EC, Parker MJ, Cohen MC, Wagner BE, Sobey G. 2008. De Barsy syndrome: a review of the phenotype. Clin Dysmorphol 17: 99-107.
40. Bicknell LS, Pitt J, Aftimos S, Ramadas R, Maw MA, Robertson SP. 2008. A missense mutation in the ALDH18A1, encoding Delta1-pyrroline-5-carboxylate syndrome (P5CS), causes an autosomal recessive neurocutaneous syndrome. Eur J Hum Genet 16: 1176-1186.
41. Skidmore DL, Chitayat D, Morgan T, Hinek A, Fischer B, Dimopoulou A, et al. 2011. Further expansion of the phenotypic spectrum associated with mutations in ALDH18A1, encoding Δ1-pyrroline-5-carboxylate synthase (P5CS). Am J Med Genet A 155A: 1848-1856.
42. Fischer B, Callewaert B, Schröter P, Coucke PJ, Schlack C, Ott CE, et al. 2014. Severe congenital cutis laxa with cardiovascular manifestations due to homozygous deletions in ALDH18A1. Mol Genet Metab 112: 310-316.
43. Wolthuis DF, van Asbeck E, Mohamed M, Gardeitchik T, Lim-Melia ER, Wevers RA, et al. 2014. Cutis laxa, fat pads and retinopathy due to ALDH18A1 and review of the literature. Eur J Paediatr Neurol 18: 511-515.
44. FitzPatrick DR, Keeling JW, Evans MJ, Kan AE, Bell JE, Porteous ME, et al. 1998. Clinical phenotype of desmosterolosis. Am J Med Genet 75: 145-152.
45. Zolotushko J, Flusser H, Markus B, Shelef I, Langer Y, Heverin M, et al. 2011. The desmosterolosis phenotype: spasticity, microcephaly and micrognathia with agenesis of corpus callosum and loss of white matter. Eur J Hum Genet 19: 942-946.
46. Schaaf CP, Koster J, Katsonis P, Kratz L, Shchelochkov OA, Scaglia F, et al. 2011. Desmosterolosis-phenotypic and molecular characterization of a third case and review of the literature. Am J Med Genet A 155A: 1597-1604.
47. Andria A, Strisciuglio P, Pontarelli G, Sly WS, Dodson WE. 1981. Infantile neuraminidase and beta-galactosidase deficiencies (galactosialidosis) with mild clinical courses. In: Perspectives in Inherited Metabolic Diseases. Milan Ermes (pub.) 4: pp. 379-395.
48. Chitayat D, Applegarth DA, Lewis J, Dimmick JE, McCormick AQ, Hall JG. 1988. Juvenile galactosialidosis in a white male: a new variant. Am J Med Genet 31: 887-901.
49. Goldberg MF, Cotlier E, Fichenscher LG, Kenyon K, Enat R, Borowsky SA. 1971. Macular cherry-red spot, corneal clouding, and beta-galactosidase deficiency. Clinical, biochemical, and electron microscopic study of a new autosomal recessive storage disease. Arch Intern Med 128: 387-398.
50. Henneke M, Preuss N, Engelbrecht V, Aksu F, Bertini E, Bibat G, et al. 2005. Cystic leukoencephalopathy without megalencephaly: a distinct disease entity in 15 children. Neurology 64: 1411-1416.
51. Mirzaa G, Dodge NN, Glass I, Day C, Gripp K, Nicholson L, et al. 2004. Megalencephaly and perisylvian polymicrogyria with postaxial polydactyly and hydrocephalus: a rare brain malformation syndrome associated with mental retardation and seizures. Neuropediatrics 35: 353-359.
52. Tohyama J, Akasaka N, Saito N, Yoshimura J, Nishiyama K, Kato M. 2007. Megalencephaly and polymicrogyria with polydactyly syndrome. Pediatr Neurol 37: 148-151.
53. Hengst M, Tücke J, Zerres K, Blaum M, Häusler M. 2010. Megalencephaly, mega corpus callosum, and complete lack of motor development: delineation of a rare syndrome. Am J Med Genet 152A: 2360-2364.
54. Tarpey PS, Raymond FL, O’Meara S, Edkins S, Teague J, Butler A, et al. 2007. Mutations in CUL4B, which encodes a ubiquitin E3 ligase subunit, cause an X-linked mental retardation syndrome associated with aggressive outbursts, seizures, relative macrocephaly, central obesity, hypogonadism, pes cavus, and tremor. Am J Hum Genet 80: 345-352.
55. Zhang X, Ling J, Barcia G, Jing L, Wu J, Barry BJ, et al. 2014. Mutations in QARS, encoding glutaminyl-tRNA synthetase, cause progressive microcephaly, cerebral-cerebellar atrophy, and intractable seizures. Am J Hum Genet 94: 547-558.
56. Bakircioglu M, Carvalho OP, Khurshid M, Cox JJ, Tuysuz B, Barak T, et al. 2011. The essential role of centrosomal NDE1 in human cerebral cortex neurogenesis. Am J Hum Genet 88: 523-535.
57. Alkuraya FS, Cai X, Emery C, Mochida GH, Al-Dosari MS, Felie JM, et al. 2011. Human mutations in NDE1 cause extreme microcephaly with lissencephaly. Am J Hum Genet 88: 536-547.
58. Gai X, Ghezzi D, Johnson MA, Biagosch CA, Shamseldin HE, Haack TB, et al. 2013. Mutations in FBXL4, encoding a mitochondrial protein, cause early-onset mitochondrial encephalomyopathy. Am J Hum Genet 93: 482-495.
59. Kato M, Saitsu H, Murakami Y, Kikuchi K, Watanabe S, Iai M, et al. 2014. PIGA mutations cause early-onset epileptic encephalopathies and distinctive features. Neurology 82: 1587-1596.
60. Johnston JJ, Gropman AL, Sapp JC, Teer JK, Martin JM, Liu CF, et al. 2012. The phenotype of a germline mutation in PIGA: the gene somatically mutated in paroxysmal nocturnal hemoglobinuria. Am J Hum Genet 90: 295-300.
61. van der Crabben SN, Harakalova M, Brilstra EH, van Berkestijin FM, Hofstede FC, van Vught AJ, et al. 2014. Expanding the spectrum of phenotypes associated with germline PIGA mutations: a child with developmental delay, accelerated linear growth, facial dysmorphisms, elevated alkaline phosphatase, and progressive CNS abnormalities. Am J Med Genet 164A: 29-35.
62. Belet S, Fieremans N, Yuan X, Van Esch H, Verbeeck J, Ye Z, et al. 2014. Early frameshift mutation in PIGA identified in a large XLID family without neonatal lethality. Hum Mutat 35: 350-355.
63. Schaffer AE, Eggens VR, Caglayan AO, Reuter MS, Scott E, Coufal NG, et al. 2014. CLP1 founder mutation links tRNA splicing and maturation to cerebellar development and neurodegeneration. Cell 157: 651-663.
64. Karaca E, Weitzer S, Pehlivan D, Shiraishi H, Gogakos T, Hanada T, et al. 2014. Human CLP1 mutations alter tRNA biogenesis, affecting both peripheral and central nervous system function. Cell 157: 636-650.
65. Reardon W, Hockey A, Silberstein P, Kendall B, Farag TI, Swash M, et al. 1994. Autosomal recessive congenital intrauterine infection-like syndrome of microcephaly, intracranial calcification, and CNS disease. Am J Med Genet 52: 58-65.
66. Prasad C, Rupar T, Prasad AN. 2011. Pyruvate dehydrogenase deficiency and epilepsy. Brain Dev 33: 856-865.
67. Oz-Levi D, Ben-Zeev B, Ruzzo EK, Hitomi Y, Gelman A, Pelak K, et al. 2012. Mutation in TECPR2 reveals a role for autophagy in hereditary spastic paraparesis. Am J Hum Genet 91: 1065-1072.
68. Cullup T, Kho AL, Dionisi-Vici C, Brandmeier B, Smith F, Urry Z, et al. 2013. Recessive mutations in EPG5 cause Vici syndrome, a multisystem disorder with defective autophagy. Nat Genet 45: 83-87.
69. Bem D, Yoshimura S, Nunes-Bastos R, Bond FC, Kurian MA, Rahman F, et al. 2011. Loss-of-function mutations in RAB18 cause Warburg micro syndrome. Am J Hum Genet 88: 499-507.
70. Kanavakis E, Xaidara A, Papathanasiou-Klontza D, Papadimitriou A, Velentza S, Youroukos S. 2003. Alternating hemiplegia of childhood: a syndrome inherited with an autosomal dominant trait. Dev Med Child Neurol 45: 833-836.
71. Bassi MT, Bresolin N, Tonelli A, Nazos K, Crippa F, Baschirotto C, et al. 2004. A novel mutation in the ATP1A2 gene causes alternating hemiplegia of childhood. J Med Genet 41: 621-628.
72. Heinzen EL, Swoboda KJ, Hitomi Y, Gurrieri F, Nicole S, de Vries B, et al. 2012. De novo mutations in ATP1A3 cause alternating hemiplegia of childhood. Nat Genet 44: 1030-1034.
73. Prasad AN, Breen JC, Ampola MG, Rosman NP. 1997. Argininemia: a treatable genetic cause of progressive spastic diplegia simulating cerebral palsy: case reports and literature review. J Child Neurol 12: 301-309.
74. Vanhanen SL, Puranen J, Autti T, Raininko R, Liewendahl K, Nikkinen P, et al. 2004. Neuroradiological findings (MRS, MRI, SPECT) in infantile neuronal ceroid-lipofuscinosis (infantile CLN1) at different stages of the disease. Neuropediatrics 35: 27-35.
75. Mole SE, Williams RE, Goebel HH. 2005. Correlations between genotype, ultrastructural morphology and clinical phenotype in the neuronal ceroid lipofuscinoses. Neurogenetics 6: 107-126.
76. Grünewald S, Imbach T, Huijben K, Rubio-Gozalbo ME, Verrips A, de Klerk JB, et al. 2000. Clinical and biochemical characteristics of congenital disorder of glycosylation type Ic, the first recognized endoplasmic reticulum defect in N-glycan synthesis. Ann Neurol 47: 776-781.
77. Poirier K, Saillour Y, Bahi-Buisson N, Jaglin XH, Fallet-Bianco C, Nabbout R, et al. 2010. Mutations in the neuronal beta-tubulin subunit TUBB3 result in malformation of cortical development and neuronal migration defects. Hum Mol Genet 19: 4462-4473.
78. Poirier K, Lebrun N, Broix L, Tian G, Saillour Y, Boscheron C, et al. 2013. Mutations in the TUBG1, DYNC1H1, KIF5C and KIF2A cause malformations of cortical development and microcephaly. Nat Genet 45: 639-647.
79. de Ligt J, Willemsen MH, van Bon BW, Kleefstra T, Yntema HG, Kroes T, et al. 2012. Diagnostic exome sequencing in persons with severe intellectual disability. N Engl J Med 367: 1921-1929.
80. Neilson DE, Adams MD, Orr CM, Schelling DK, Eiben RM, Kerr DS, et al. 2009. Infection-triggered familiar or recurrent cases of acute necrotizing encephalopathy caused by mutations in a component of the nuclear pore, RANBP2. Am J Hum Genet 84: 44-51.
81. Kousi M, Anttila V, Schulz A, Calafato S, Jakkula E, Riesch E, et al. 2012. Novel mutations consolidate KCTD7 as a progressive myoclonus epilepsy gene. J Med Genet 49: 391-399.
82. Tohyama J, Akasaka N, Osaka H, Maegaki Y, Kato M, Saito N, et al. 2008. Early onset West syndrome with cerebral hypomyelination and reduced cerebral white matter. Brain Dev 30: 349-355.
83. Hamdan FF, Saitsu H, Nishiyama K, Gauthier J, Dobrzeniecka S, Spiegelman D, et al. 2012. Identification of a novel in-frame de novo mutation in SPTAN1 in intellectual disability and pontocerebellar atrophy. Eur J Hum Genet 20: 596-800.
84. Writzl K, Primec ZR, Stražišar BG, Osredkar D, Pečarič-Meglič N, Kranjc BS, et al. 2012. Early onset West syndrome with severe hypomyelination and coloboma-like optic discs in a girl with SPTAN1 mutation. Epilepsia 53: e106-110.
85. Nonoda Y, Saito Y, Nagai S, Sasaki M, Iwasaki T, Matsumoto N, et al. 2013. Progressive diffuse brain atrophy in West syndrome with marked hypomyelination due to SPTAN1 gene mutation. Brain Dev 35: 280-283.
86. Weckhuysen S, Mandelstam S, Suls A, Audenaert D, Deconinck T, Claes LR, et al. 2012. KCNQ2 encephalopathy: emerging phenotype of a neonatal epileptic encephalopathy. Ann Neurol 71: 15-25.
87. Shimojima K, Sugawara M, Shichiji M, Mukaida S, Takayama R, Imai K, et al. 2011. Loss-of-function mutation of collybistin is responsible for X-linked mental retardation associated with epilepsy. J Hum Genet 56: 561-565.
88. Harvey K, Duguid IC, Alldred MJ, Beatty SE, Ward H, Keep NH, et al. 2004. The GDP-GTP exchange factor collybistin: an essential determinant of neuronal gephyrin clustering. J Neurosci 24: 5816-5826.
89. Marco EJ, Abidi FE, Bristow J, Dean WB, Cotter P, Jeremy RJ, et al. 2008. ARHGEF9 disruption in a female patient is associated with X linked mental retardation and sensory hyperarousal. J Med Genet 45: 100-105.
90. Wang D, Kranz-Eble P, De Vivo DC. 2000. Mutational analysis of GLUT1 (SLC2A1) in Glut-1 deficiency syndrome. Hum Mutat 16: 224-231.
91. Wilson A, Leclerc D, Saberi F, Campeau E, Hwang HY, Shane B, et al. 1998. Functionally null mutations in patients with the cbIG-variant form of methionine synthase deficiency. Am J Hum Genet 63: 409-414.
92. Kvittingen EA, Spangen S, Lindemans J, Fowler B. 1997. Methionine synthase deficiency without megaloblastic anaemia. Eur J Pediatr 156: 925-930.
93. Leclerc D, Campeau E, Goyette P, Adjalla CE, Christensen B, Ross M, et al. 1996. Human methionine synthase: cDNA cloning and identification of mutations in patients of the cbIG complementation group of folate/cobalamin disorders. Hum Mol Genet 5: 1867-1874.
94. Gulati S, Baker P, Li YN, Fowler B, Kruger W, Brody LC, et al. 1996. Defects in human methionine synthase in cbIG patients. Hum Mol Genet 5: 1859-1865.
95. Rosenblatt DS, Thomas IT, Watkins D, Cooper BA, Erbe RW. 1987. Vitamin B12 responsive homocystinuria and megaloblastic anemia: heterogeneity in methylcobalamin deficiency. Am J Med Genet 26: 377-383.
96. Labrune P, Zittoun J, Duvaltier I, Trioche P, Marquet J, Niaudet P, et al. 1999. Haemolytic uraemic syndrome and pulmonary hypertension in a patient with methionine synthase deficiency. Eur J Pediatr 158: 734-739.
97. Abou Jamra R, Wohlfart S, Zweier M, Uebe S, Priebe L, Ekici A, et al. 2011. Homozygosity mapping in 64 Syrian consanguineous families with non-specific intellectual disability reveals 11 novel loci and high heterogeneity. Eur J Hum Genet 19: 1161-1166.
98. Krawitz PM, Murakami Y, Reiss A, Hietala M, Krüger U, Zhu N, et al. 2013. PGAP2 mutations, affecting the GPI-anchoring-synthesis pathway, cause hyperphosphatasia with mental retardation syndrome. Am J Hum Genet 92: 584-589.
99. Aldahmesh MA, Mohamed JY, Alkuraya HS, Verma IC, Puri RD, Alaiya AA, et al. 2011. Recessive mutations in ELOVL4 cause ichthyosis, intellectual disability, and spastic quadriplegia. Am J Hum Genet 89: 745-750.
100. FitzPatrick DR, Hill A, Tolmie JL, Thorburn DR, Christodoulou J. 1999. The molecular basis of malonyl-CoA decarboxylase deficiency.
101. Biancheri R, Zara F, Bruno C, Rossi A, Bordo L, Gazzerro E, et al. 2007. Phenotypic characterization of hypomyelination and congenital cataract. Ann Neurol 62: 121-127.
102. Cario H, Smith DE, Blom H, Blau N, Bode H, Holzmann K, et al. 2011. Dhydrofolate reductase deficiency due to a homozygous DHFR mutation causes megaloblastic anemia and cerebral folate deficiency leading to severe neurologic disease. Am J Hum Genet 88: 226-231.
103. Banka S, Blom HJ, Walter J, Aziz M, Urquhart J, Clouthier CM, et al. 2011. Identification and characterization of an inborn error of metabolism caused by dihydrofolate reductase deficiency. Am J Hum Genet 88: 216-225.
104. Bilgüvar K, Oztürk AK, Louvi A, Kwan KY, Choi M, Tatli B, et al. 2010. Whole-exome sequencing identifies recessive WDR62 mutations in severe brain malformations. Nature 467: 207-210.
105. Shen J, Gilmore EC, Marshall CA, Haddadin M, Reynolds JJ, Eyaid W, et al. 2010. Mutations in PNKP cause microcephaly, seizures and defects in DNA repair. Nat Genet 42: 245-249.
106. Saitsu H, Nishimura T, Muramatsu K, Kodera H, Kumada S, Sugai K, et al. 2013. De novo mutations in the autophagy gene WDR45 cause static encephalopathy of childhood with neurodegeneration in adulthood. Nat Genet 45: 445-449.
107. van der Knaap MS, Valk J. 1989. The reflection of histology in MR imaging of Pelizaeus-Merzbacher disease. AJNR Am J Neuroradiol 10: 99-103.
108. Wang P-J, Young C, Liu H-M, Chang Y-C, Shen Y-Z. 1995. Neurophysiologic studies and MRI in Pelizaeus-Merzbacher disease: comparison of classic and connatal forms. Pediatr Neurol 12: 47-53.
109. De Koning TJ, Duran M, Van Maldergem L, Pineda M, Dorland L, Gooskens R, et al. 2002. Congenital microcephaly and seizures due to 3-phosphoglycerate dehydrogenase deficiency: outcome of treatment with amino acids. J Inherit Metab Dis 25: 119-125.
110. Jaeken J, Detheux M, Van Maldergem L, Foulon M, Carchon H, Van Schaftingen E. 1996. 3-Phosphoglycerate dehydrogenase deficiency: an inborn error of serine biosynthesis. Arch Dis Child 74: 542-545.
111. Kheradmand Kia S, Verbeek E, Engelen E, Schot R, Poor RA, de Coo IF, et al. 2012. RTTN mutations links primary cilia function to organization of the human cerebral cortex. Am J Hum Genet 91: 533-540.
112. Ben-Zeev, B, Hoffman C, Lev D, Watemberg N, Malinger G, Brand N, et al. 2003. Progresive cerebellocerebral atrophy: a new syndrome with microcephaly, mental retardation, and spastic quadriplegia. J Med Genet 40: e96.
113. Makrythanasis P, Nelis M, Santoni FA, Guipponi M, Vannier A, Béna F, et al. 2014. Diagnostic exome sequencing to elucidate the genetic basis of likely recessive disorders in consanguineous families. Hum Mutat 35: 1203-1210.
114. Ivanov IS, Azmanov DN, Ivanova MB, Chamova T, Pacheva IH, Panova MV, et al. 2014. Founder p.Arg 446* mutations in the PDHX gene explains over half of cases with congenital lactic acidosis in Roma children. Mol Genet Metab 113: 76-83.
115. Wang H, Bright A, Xin B, Bockoven JR, Paller AS. 2013. Cutaneous dyspigmentation in patients with gangiolside GM3 synthase deficiency. Am J Med Genet A 161A: 875-879.
116. Bakker HD, de Sonnaville ML, Vreken P, Abeling NG, Groener JE, Keulemans JL, et al. 2001. Human alpha-N-acetylgalactosaminidase (alpha-NAGA) deficiency: no association with neuroaxonal dystrophy? Eur J Hum Genet 9: 91-96.
117. Guerguelcheva V, Azmanov DN, Angelicheva D, Smith KR, Chamova T, Florez L, et al. 2012. Autosomal-recessive congenital cerebellar ataxia is caused by mutations in metabotropic glutamate receptor 1. Am J Hum Genet 91: 553-564.
118. Ozand PT, Gascon GG, Al Essa M, Joshi S, Al Jishi E, Bakheet S, et al. 1998. Bioin-responsive basal ganglia disease: a novel entity. Brain 121: 1267-1279.
119. Basel-Vanagaite L, Hershkovitz T, Heyman E, Raspall-Chaure, Kakar N, Smirin-Yosef P, et al. 2013. Biallelic SZT2 mutations cause infantile encephalopathy with epilepsy and dysmorphic corpus callosum. Am J Hum Genet 93: 524-529.
120. Passemard S, Titomanlio L, Elmaleh M, Afenjar A, Alessandri JL, Andria G, et al. 2009. Expanding the clinical and neuroradiologic phenotype of primary microcephaly due to ASPM mutations. Neurology 73: 962-969.
121. Timal S, Hoischen A, Lehle L, Adamowicz M, Huijben K, Sykut-Cegielska J, et al. 2012. Gene identification in the congenital disorders of glycosylation type I by whole-exome sequencing. Hum Mol Genet 21: 4151-4161.
122. Epi4K Consortium; Epilepsy Phenome/Genome Project, Allen AS, Berkovic SF, Cossette P, Delanty N, et al. 2013. De novo mutations in epileptic encephalopathies. Nature 501: 217-221.
123. van der Knaap MS, Jakobs C, Hoffmann GF, Duran M, Muntau AC, Schweiter S, 1999. D-2-hydroxyglutaric aciduria: further clinical delineation. J Inherit Metab Dis 22: 404-413.
124. Bjursell MK, Blom HJ, Cayuela JA, Engvall ML, Lesko N, Balasubramaniam S, et al. 2011. Adenosine kinase deficiency disrupts the methionine cycle and causes hypermethioninemia, encephalopathy, and abnormal liver function. Am J Hum Genet 89: 507-515.
125. Alazami AM, Adly N, Al Dhalaan H, Alkuraya FS. 2011. A nullimorphic ERLIN2 mutation defines a complicated hereditary spastic paraplegia locus (SPG18). Neurogenetics 12: 333-336.
126. Yıldırım Y, Orhan EK, Iseri SA, Serdaroglu-Oflazer P, Kara B, Solakoğlu S, et al. 2011. A frameshift mutation of ERLIN2 in recessive intellectual disability, motor dysfunction and multiple joint contractures. Hum Mol Genet 20: 1886-1892.
127. Gribaa M, Salih M, Anheim M, Lagier-Tourenne C, H-mida D, Drouot N, et al. 2007. A new form of childhood onset, autosomal recessive spinocerebellar ataxia and epilepsy is localized at 16q21-a23.
128. Mallaret M, Synofrik M, Lee J, Sagum CA, Manhajnah M, Sharkia R, et al. 2014. The tumour suppressor gene WWOX is mutated in autosomal recessive cerebellar ataxia with epilepsy and mental retardation. Brain 137: 411-419.
129. Cushion TD, Paciorkowski AR, Pilz DT, Mullins JG, Seltzer LE, Marion RW, et al. 2014. De novo mutations in the beta-tubulin gene TUBB2A cause simplified gural patterning and infantile-onset epilepsy. Am J Hum Genet 94: 634-641.
130. Carvill Gl, Weckhuysen S, McMahon JM, Hartmann C, Møller RS, Hjalgrim H, et al. 2014. GABRA1 and STXBP1: novel genetic causes of Dravet syndrome. Neurology 82: 1245-1253.
131. Heron SE, Smith KR, Bahlo M, Nobili L, Kahana E, Licchetta L, et al. 2012. Missense mutations in the sodium-gated potassium channel gene KCNT1 cause severe autosomal dominant nocturnal frontal lobe epilepsy. Nat Genet 44: 1188-1190.
132. Drielsma A, Jalas C, Simonis N Désir J, Simanovsky N, Pirson I, et al. 2012. Two novel CCDC88C mutations confirm the role of DAPLE in autosomal recessive congenital hydrocephalus. J Med Genet 49: 708-712.
133. Ekici AB, Hilfinger D, Jatzwauk M, Thiel CT, Wenzel D, Lorenz I, et al. 2010. Disturbed Wnt signaling due to a mutation in CCDC88C causes an autosomal recessive non-syndromic hydrocephalus with medial diverticulum. Mol Syndromol 1: 99-112.
134. Houten SM, Te Brinke H, Denis S, Ruiter JP, Knegt AC, de Klerk JB, et al. 2013. Genetic basis of hyperlysinemia. Orphanet J Rare Dis 8: 57.
135. Geraughty MT, Vaughn D, Nicholson AJ, Lin WW, Jimenez-Sanchez G, Obie C, et al. 1998. Mutations in the Delta1-pyrroline 5-carboxylate dehydrogenase gene cause type II hyperprolinemia. Hum Mol Genet 7: 1411-1415.
136. Farrant RD, Walker V, Mills GA, Mellor JM, Langley GJ. 2001. Pyridoxal phosphate de-activation by pyrroline-5-carboxylic acid. Increased risk of vitamin B6 deficiency and seizures in hyperprolinemia type II. J Biol Chem 276: 15107-15116.
137. Tarpey PS, Smith R, Pleasance E, Whibley A, Edkins S, Hardy C, et al. 2009. A systematic, large-scale resquencing screen of X-chromosome coding exons in mental retardation. Nat Genet 41: 535-543.
138. Carss KJ, Stevens E, Foley AR, Cirak S, Riemersma M, Torelli S, et al. 2013. Mutations in GDP-mannose pyrophosphorylase B cause congenital and limb-girdle muscular dystrophies associated with hypoglycosylation of α-dystroglycan. Am J Hum Genet 93: 29-41.
139. Abdollahi MR, Morrison E, Sirey T, Molnar Z, Hayward BE, Carr IM, et al. 2009. Mutation of the variant alpha-tubulin TUBA8 results in polymicrogyria with optic nerve hypoplasia. Am J Hum Genet 85: 737-744.

## Sheet: Table_4
Table 4. Number of probands studied per condition, alongside supporting references. Full
references are listed following the table.
Condition	OMIM#	Subgroup	N (total number of probands) & Supporting Refs
Acrodysostosis 1 with or without Hormone Resistance	101800	ID/CFD	37 [1-3]
Alazami Syndrome	615071	ID/CFD	11 [4-5]
Beaulieu-Boycott-Innes Syndrome	613680	ID/CFD	4 [6]
Corpus Callosum, Agenesis of, with Mental Retardation, Ocular Coloboma, and Micrognathia	300472	ID/CFD	2 [7]
Craniofacial Dysmorphism, Skeletal Anomalies, and Mental Retardation Syndrome	213980	ID/CFD	21 [8-14]
Desbuquois Dysplasia 2	615777	ID/CFD	20 [15]
Ehlers-Danlos Syndrome, Progeroid Type, 1	130070	ID/CFD	17 [16-23]
Hamamy Syndrome	611174	ID/CFD	5 [24-25]
Immunodeficiency-centromeric Instability-facial anomalies syndrome 2	614069	ID/CFD	10 [26-27]
Joubert Syndrome 14	614424	ID/CFD	13 [28-29]
Lenz-Majewski Hyperostotic Dwarfism	151050	ID/CFD	11 [30-40]
Mental Retardation, Autosomal Recessive 39	615541	ID/CFD	7 [41-42]
Mental Retardation, Autosomal Recessive 45	615979	ID/CFD	5 [43]
Mucolipidosis II Alpha/Beta	252500	ID/CFD	18 [44-45]
Noonan Syndrome 4	610733	ID/CFD	28 [46]
Noonan Syndrome 8	615355	ID/CFD	60 [47-50]
Orofaciodigital Syndrome V	174300	ID/CFD	7 [51-53]
Otofaciocervical Syndrome 1	166780	ID/CFD	8 [54-56]
Otofaciocervical Syndrome 2	615560	ID/CFD	4 [57]
Shprintzen-Goldberg Craniosyno-stosis Syndrome	182212	ID/CFD	41 [58-65]
Skeletal Defects, Genital Hypoplasia, and Mental Retardation	612447	ID/CFD	1 [66]
Xia-Gibbs Syndrome	615829	ID/CFD	4 [67]
Cerebellar Ataxia, Mental Retardation, and Dysequilibrium Syndrome 2	610185	ID/CFD/NLF	11 [68-70]
Hurler Syndrome	607014	ID/CFD/NLF	66 [71-72]
Mannosidosis, Alpha B, Lysosomal	248500	ID/CFD/NLF	16 [73-80]
Spastic Paraplegia 50, Autosomal Recessive	612936	ID/CFD/NLF	9 [81-82]
Cerebellar Ataxia, Mental Retardation, and Dysequilibrium Syndrome 3	613227	ID/NLF	4 [83]
Cerebellar Ataxia, Mental Retardation, and Dysequilibrium Syndrome 4	615268	ID/NLF	4 [84]
Cowchock Syndrome	310490	ID/NLF	7 [85]
Homocystinuria-megaloblastic Anemia, cb1E Complementation Type	236270	ID/NLF	16 [86-87]
Lesch-Nyhan Syndrome	300322	ID/NLF	12 [88-90]
Mitochondrial Complex III Deficiency, Nuclear Type 4	615159	ID/NLF	25 [91]
Mental Retardation, Autosomal Recessive 1	249500	ID/NLF	5 [92]
Mental Retardation, Autosomal Recessive 40	615599	ID/NLF	6 [93-94]
Pyruvate Dehydrogenase E2 Deficiency	245348	ID/NLF	3 [94-95]
Spastic Paraplegia 10, Autosomal Dominant	604187	ID/NLF	81 [96-100]
Spastic Paraplegia 55, Autosomal Recessive	615035	ID/NLF	14 [101-104]
Spastic Paraplegia 64, Autosomal Recessive	615683	ID/NLF	2 [105]
Spinocerebellar Ataxia, Autosomal Recessive 14	615386	ID/NLF	4 [106-107]
Urocanase Deficiency	276880	ID/NLF	4 [108-110]
Camptodactyly, Tall Stature, and Hearing Loss Syndrome	610474	ID/SFD	29 [111-112]
Chondrodys-plasia Punctata 1, X-linked Recessive	302950	ID/SFD	32 [113-117]
Coloboma, Ocular, with or without Hearing Impairment, Cleft Lip/Palate, and/or Mental Retardation	120433	ID/SFD	10 [118]
Congenital Disorder of Glycosylation, Type IId	607091	ID/SFD	2 [119-120]
Frontonasal Dysplasia 2	613451	ID/SFD	5 [121-122]
Kahrizi Syndrome	612713	ID/SFD	3 [123]
Mental Retardation, Enteropathy, Deafness, Peripheral Neuropathy, Ichthyosis, and Keratoderma	609313	ID/SFD	7 [124-125]
Mental Retardation, X-linked 93	300659	ID/SFD	11 [126]
Microcephaly 8, Primary, Autosomal Recessive	614673	ID/SFD	4 [127-128]
Shaheen Syndrome	615328	ID/SFD	12 [129]
Congenital Cataracts, Facial Dysmorphism, and Neuropathy	604168	ID/SFD/NLF	70 [130-132]
Muscular Dystrophy-Dystroglycanopathy (Congenital with Mental Retardation), Type B, 2	613156	ID/SFD/NLF	16 [133-137]
Muscular Dystrophy-Dystroglycano-pathy (Congenital with Mental Retardation), Type B, 6	608840	ID/SFD/NLF	4 [138-140]
Spastic Paraplegia 54, Autosomal Recessive	615033	ID/SFD/NLF	15 [141-143]
Alacrima, Achalasia, and Mental Retardation Syndrome	615510	ID/NONE	13 [144]
Bardet-Biedl Syndrome 7	615984	ID/NONE	8 [145-146]
Bartter Syndrome, Type 3	607364	ID/NONE	52 [147-157]
Emery-Dreifuss Muscular Dystrophy 1, X-linked	310300	ID/NONE	23 [158-164]
Feingold Syndrome 2	614326	ID/NONE	4 [165]
Formiminotrans-ferase Deficiency	229100	ID/NONE	6 [166-169]
Intrinsic Factor Deficiency	261000	ID/NONE	36 [170-173]
Joubert Syndrome 15	614464	ID/NONE	8 [174]
Joubert Syndrome 17	614615	ID/NONE	14 [175-176]
Mental Retardation, Autosomal Recessive 2	607417	ID/NONE	10 [177]
Mental Retardation, Autosomal Recessive 36	615286	ID/NONE	34 [178]
Mental Retardation, Autosomal Recessive 43	615817	ID/NONE	7 [179]
Mental Retardation, Truncal Obesity, Retinal Dystrophy, and Micropenis	610156	ID/NONE	14 [180]
Microcephaly 4, Primary, Autosomal Recessive	604321	ID/NONE	7 [181]
Orotic Aciduria	258900	ID/NONE	11 [182]
Renal Tubular Acidosis, Proximal, with Ocular Abnormalities and Mental Retardation	604278	ID/NONE	4 [183-185]
References for Table 4:
1. Robinow M, Pfeiffer RA, Gorlin RJ, McKusick VA, Renuart VA, Johnson GF, et al. 1971. Acrodysostosis. A syndrome of peripheral dysostosis, nasal hypoplasia, and mental retardation. Am J Dis Child 121: 195-203.
2. Viljoen D, Beighton P. 1991. Epiphyseal stippling in acrodystosis. Am J Med Genet 38: 43-45.
3. Michot C, Le Goff C, Goldenberg A, Abhyankar A, Klein C, Kinning E, et al. 2012. Exome sequencing identifies PDE4D mutations as another cause of acrodystosis. Am J Hum Genet 90: 740-745.
4. Alazami AM, Al-Owain M, Alzahrani F, Shuaib T, Al-Shamrani H, Al-Falki YH, et al. 2012. Loss of function mutation in LARP7, chaperone of 7SK ncRNA, causes a syndrome of facial dysmorphism, intellectual disability, and primordial dwarfism. Hum Mutat 33: 1429-1434.
5. Ling TT, Sorrentino S. 2016. Compound heterozygous variants in the LARP7 gene as a cause of Alazami syndrome in a Caucasian female with significant failure to thrive, short stature, and developmental disability. Am J Med Genet A 170A: 217-219.
6. Boycott KM, Beaulieu C, Puffenberger EG, McLeod DR, Parboosingh JS, Innes AM. 2010a. A novel autosomal recessive malformation syndrome associated with developmental delay and distinctive facies maps to 16ptel in the Hutterite population. Am J Med Genet A 152A: 1349-1356.
7. Graham JM Jr, Wheeler P, Tackels-Home D, Lin AE, Hall BD, May M, et al. 2003. A new X-linked syndrome with agenesis of the corpus callosum, mental retardation, coloboma, micrognathia, and a mutation in the Alpha 4 gene at Xq13. Am J Med Genet A 15: 37-44.
8. Xin B, Puffenberger EG, Turben S, Tan H, Zhou A, Wang H. 2010. Homozygous frameshift mutation in TMCO1 causes a syndrome with craniofacial dysmorphisms, skeletal anomalies, and mental retardation. Proc Natl Acad Sci USA 107: 258-263.
9. Pascual-Castroviejo I, Santolaya JM, Martin VL, Rodriguez-Costa T, Tendero A, Mulas F. 1975. Cerebro-facio-thoracic dysplasia: report of three cases. Dev Med Child Neurol 17: 343-351.
10. Philip N, Guala A, Moncla A, Monlouis M, Aymé S, Giraud F. 1992. Cerebrofaciothoracic dysplasia: a new family. J Med Genet 29: 497-499.
11. Guion-Almeida ML, Richieri-Costa A, Saavedra D, Cohen MM Jr. 1996. Cerebrofaciothoracic syndrome. Am J Med Genet 61: 152-153.
12. Kanaka-Gantenbein C, Fryssira H, Chrousos G, Mastorakos G. 2004. Growth hormone deficiency in a case of cerebrofaciothoracic syndrome in one of two affected siblings. Am J Med Genet A 129A: 330.
13. Cilliers D, Alanay Y, Boduroglu K, Utine E, Tunçbilek E, Clayton-Smith J. 2007. Cerebro-facio-thoracic dysplasia: expanding the phenotype. Clin Dysmorphol 16: 121-125.
14. Caglayan AD, Per H, Akgumus G, Gumus H, Baranoski J, Canpolat M, et al. 2013. Whole-exome sequencing identified a patient with TMCO1 defect syndrome and expands the phenotic spectrum. Clin Genet 84: 394-395.
15. Bui C, Huber C, Tuysuz B, Alanay Y, Bole-Feysot C, Leroy JG, et al. 2014. XYLT1 mutations in Desbuquois dysplasia type 2. Am J Hum Genet 94: 405-414.
16. Kresse H, Rosthøj S, Quentin E, Hollman J, Glössl J, Okada S, et al. 1987. Glycosaminoglycan-free small proteoglycan core protein is secreted by fibroblasts from a patient with a syndrome resembling progeroid. Am J Hum Genet 41: 436-453.
17. Topley JM, Varady E, Lestringant GG. 1994. Larsen syndrome in siblings with consanguineous parents. Clin Dysmorphol 3: 263-265.
18. Faiyaz-Ul_Haque M, Zaidi SH, Al-Ali M, Al-Mureikhi MS, Kennedy S, Al-Thani G, et al. 2004. A novel miww3nw3 mutation in the galactosyltransferase-I (B4GALT7) gene in a family exhibiting facioskeletal anomalies and Ehlers-Danlos syndrome resembling the progeroid type. Am J Med Genet A 128A: 39-45.
19. Guo MH, Stoler J, Lui J, Nilsson O, Bianchi DW, Hirschhorn JN, et al. 2013. Redefining the progeroid form of Ehlers-Danlos syndrome: report of the fourth patient with B4GALT7 deficiency and review of the literature. Am J Med Genet A 161A: 2519-2527.
20. Salter CG, Davies JH, Moon RJ, Fairhurst J, Bunyan D, DDD Study, et al. 2016. Further defining the phenotypic spectrum of B4GALT7 mutations. Am J Med Genet A 170: 1556-1563.
21. Bonaventure J, Lasselin C, Mellier J, Cohen-Solal L, Maroteaux P. 1992. Linkage studies of four fibrillar collagen genes in three pedigrees with Larsen-like syndrome. J Med Genet 29: 465-470.
22. Hernández A, Aquirre-Negrete MG, Ramírez-Soltero S, González-Mendoza A, Martínez y Martínez R, Velázquez-Cabrera A, et al. 1979. A distinct variant of the Ehlers-Danlos syndrome. Clin Genet 16: 335-339.
23. Hernández A, Aquirre-Negrete MG, González-Flores S, Reynoso-Luna MC, Fragoso R, Nazará Z, et al. 1986. Ehlers-Danlos features with progeroid facies and mild mental retardation. Further delineation of the syndrome. Clin Genet 30: 456-461.
24. Hamamy HA, Teebi AS, Oudjhane K, Shegem NN, Ajlouni KM. 2007. Severe hypertelorism, midface prominence, prominent/simple ears, severe myopia, borderline intelligenc, and bone frafility in two brothers: new syndrome? Am J Med Genet A 143: 229-234.
25. Bonnard C, Strobl AC, Shboul M, Lee H, Merriman B, Nelson SF, et al. 2012. Mutations in IRX5 impair craniofacial development and germ cell migration via SFD1. Nat Genet 44: 709-713.
26. De Greef JC, Wang J, Balog J, den Dunnen JT, Frants RR, Straasheijm KR, et al. 2011. Mutations in ZBTB24 are associated with immunodeficiency, centromeric instability, and facial anomalies syndrome type 2. Am J Hum Genet 88: 796-804.
27. Chouery E, Abou-Ghoch J, Corbani S, El Ali N, Korban R, Salem N, et al. 2012. A novel deletion in ZBTB24 in a Lebanese family with immunodeficiency, centromeric instability, and facial anomalies syndrome type 2. Clin Genet 82: 489-493.
28. Boycott KM, Parboosingh JS, Scott JN, McLeod DR, Greenberg CR, Fujuwara TM, et al. 2007. Meckel syndrome in the Hutterite population is actually a Joubert-related cerebello-oculo-renal syndrome. Am J Med Genet A 143: 1715-1725.
29. Janecke AR, Müller T, Gassner I, Kreczy A, Schmid E, Kronenberg F, et al. 2004. Joubert-like syndrome unlinked to known candidate loci. J Pediatr 144: 264-269.
30. Braham RL. 1969. Multiple congenital abnormalities with diaphyseal dysplasia (Camurati-Engelmann’s syndrome). Report of a case. Oral Surg Oral Med Oral Pathol 27: 20-26.
31. Macpherson RI. 1974. Craniodiaphyseal dysplasia, a disease or group of diseases? J Can Assoc Radiol 25: 22-33.
32. Lens WD, Majewski F. 1974. A generalized disorder of the connective tissues with progeria, choanal atresia, symphalangism, hypoplasia of dentine and craniodiaphyseal hyperostosis. Birth Defects Orig Art Ser X(12): 133-136.
33. Kaye CI, Fisher DE, Esterly NB. 1974. Cutis laxa, skeletal anomalies, and ambiguous genitalia. Am J Dis Child 127: 115-117.
34. Robinow M, Johanson AJ, Smith TH. 1977. The Lenz-Majewski hyperostotic dwarfism. A syndrome of multiple congenital anomalies, mental retardation, and progressive skeletal sclerosis. J Pediatr 91: 417-421.
35. Gorlin Rj, Whitley CB. 1983. Lenz-Majewski syndrome. Radiology 149: 129-131.
36. Chrzanowska KH, Fryns JP, Krajewska-Walasek M, Van den Berghe H, Wisniewski L. 1989. Skeletal dysplasia syndrome with progeroid appearance, characteristic facial and limb anomalies, multiple synostoses, and distinct skeletal changes: a variant example of the Lenz-Majewski syndrome. Am J Med Genet 32: 470-474.
37. Saraiva JM. 2000. Dysgenesis of corpus callosum in Lenz-Majewski hyperostotic dwarfism. Am J Med Genet 91: 198-200.
38. Wattanasirichaigoon D, Visudtibhan A, Jaovisidha S, Laothamatas J, Chunharas A. 2004. Expanding the phenotypic spectrum of Lenz-Majewski syndrome: facial palsy, cleft palate and hydrocephalus. Clin Dysmorphol 13: 137-142.
39. Dateki S, Kondoh T, Nishimura G, Motomura K, Yoshiura K, Kinoshita A, et al. 2007. A Japanese patient with a mild Lenz-Majewski syndrome. J Hum Genet 52: 686-689.
40. Sousa SB, Jenkins D, Chanudet E, Tasseva G, Ishida M, Anderson G, et al. 2014. Gain-of-function mutations in the phosphatidylserine synthase 1 (PTDSS1) gene cause Lenz-Majewski syndrome. Nat Genet 46: 70-76.
41. Langouët M, Saadi A, Rieunier G, Moutton S, Siquier-Pernet K, Fernet M, et al. 2013. Mutation in TTI2 reveals a role for triple T complex in human brain development. Hum Mutat 34: 1472-1476.
42. Najmabadi H, Hu H, Garshasbi M, Zemojtel T, Abedini SS, Chen W, et al. 2011. Deep sequencing reveals 50 novel genes for recessive cognitive disorders. Nature 478: 57-63.
43. Mir A, Sritharan K, Mittal K, Vasli N, Araujo C, Jamil T, et al. 2014. Truncation of the E3 ubiqutin ligase component FBXO31 causes non-syndromic autosomal recessive intellectual disability in a Pakistani family. Hum Genet 133: 975-984.
44. Beck M, Barone R, Hoffmann R, Kratzer W, Rakowsky T, Nigro F, et al. 1995. Inter- and intrafamilial variability in mucolipidosis II (I-cell disease). Clin Genet 47: 191-199.
45. Encarnação M, Lacerda L, Costa R, Prata MJ, Coutinho MF, Ribeiro H, et al. 2009. Molecular analysis of the GNPTAB and GNPTG genes in 13 patients with mucolipidosis type II or type III – identification of eight novel mutations. Clin Genet 76: 76-84.
46. Zenker M, Horn D, Wieczorek D, Allanson J, Pauli S, van der Burgt I, et al. 2007. SOS1 is the second most common Noonan gene but plays no major role in cardio-facio-cutaneous syndrome. J Med Genet 44: 651-656.
47. Aoki Y, Niihori T, Banjo T, Okamoto N, Mizuno S, Kurosawa K, et al. 2013. Gain-of-function mutations in RIT1 cause Noonan syndrome, a RAS/MAPK pathway syndrome. Am J Hum Genet 93: 173-180.
48. Bertola DR, Yamamoto GL, Almeida TF, Buscarilli M, Jorge AA, Malaquias AC, et al. 2014. Further evidence of the importance of RIT1 in Noonan syndrome. Am J Med Genet A 164: 2952-2957.
49. Gos M, Fahiminiya S, Poznański J, Klapecki J, Obersztyn E, Piotrowicz M, et al. 2014. Contribution of RIT1 mutations to the pathogenesis of Noonan syndrome: four new cases and further evidence of heterogeneity. Am J Med Genet A 164: 2310-2316.
50. Kouz K, Lissewski C, Spranger S, Mitter D, Riess A, Lopez-Gonzalez V, et al. 2016. Genotype and phenotype in patients with Noonan syndrome and a RIT1 mutation. Genet Med 18: 1226-1234.
51. Thurston EO. 1909. A case of median hare-lip associated with other malformations. Lancet 174: 996-997.
52. Khoo CT, Saad MN. 1980. Median cleft of the upper lip in association with bilateral hexadactyly and accessory toes. Br J Plast Surg 33: 407-409.
53. Shamseldin HE, Rajab A, Alhashem A, Shaheen R, Al-Shidi T, Alamro R, et al. 2013. Am J Hum Genet 93: 555-560.
54. Fara M, Chlupackova V, Hrivnakova J. 1967. Dismorphia oto-facio-cervicalis familiaris. Act Chir Plast 9: 255-268.
55. Dallapiccola B, Mingarelli R. 1995. Otofaciocervical syndrome: a sporafic patient supports splitting from the branchio-oto-renal syndrome. J Med Genet 32: 816-818.
56. Rickard S, Parker M, van’t Hoff W, Barnicoat A, Russell-Eggitt I, Winter RM, et al. 2001. Oto-facio-cervical(OFC) syndrome is a contiguous gene deletion syndrome involving EYA1: molecular analysis confirms allelism with BOR syndrome and further narrows the Duane syndrome critical region. Hum Genet 108: 398-403.
57. Pohl E, Aykut A, Beleggia F, Karaca E, Durmaz B, Keupp K, et al. 2013. A hypofunctional PAX1 mutation causes autosomal recessively inherited otofaciocervical syndrome. Hum Genet 132: 1311-1320.
58. Shprintzen RJ, Goldberg RB. 1982. A recurrent pattern syndrome of craniosynostosis associated with arachnodactyly and abdominal hernias. J Craniofac Genet Dev Biol 2: 65-74.
59. Adés LC, Morris LL, Power RG, Wilson M, Haan EA, Bateman JF, et al. 1995. Distinct skeletal abnormalities in four girls with Shprintzen-Goldberg syndrome. Am J Med Genet 57: 565-572.
60. Saal HM, Bulas DI, Allen JF, Vezina LG, Walton D, Rosenbaum KN. 1995. Patient with craniosynostosis and marfanoid phenotype (Shprintzen-Goldberg syndrome) and cloverleaf skull. Am J Med Genet 57: 573-578.
61. Shah AM, Chattopadhyay A, Kher A, Bharucha BA, Karapurkar AP. 1996. Craniosynostosis with Marfan syndrome, hand and foot anomalies. Clin Dysmorphol 5: 263-266.
62. Hassed S, Shewmake K, Teo C, Curtis M, Cunniff C. 1997. Shprintzen-Goldberg syndrome with osteopenia and progressive hydrocephalus. Am J Med Genet 70: 450-453.
63. Greally MT, Carey JC, Milewicz DM, Hudgins L, Goldberg RB, Shprintzen RJ, et al. 1998. Shprintzen-Goldberg syndrome: a clinical analysis. Am J Med Genet 76: 202-212.
64. Loeys BL, Chen J, Neptune ER, Judge DP, Podowski M, Holm T, et al. 2005. A syndrome of altered cardiovascular, craniofacial, neurocognitive and skeletal developmental caused by mutations in TGFBR1 and TGBR2. Nat Genet 37: 275-281.
65. Robinson PN, Neumann LM, Demuth S, Enders H, Jung U, König R, et al. 2005. Shprintzen-Goldberg syndrome: fourteen new patients and a clinical analysis. Am J Med Genet A 135: 251-262.
66. Wieczorek D, Köster B, Gilessen-Kaesbach G. 2002. Absence of thumbs, A/hypoplasia of radius, hypoplasia of ulnae, retarded bone age, short stature, microcephaly, hypoplastic genitalia, and mental retardation. Am J Med Genet 108: 209-213.
67. Xia F, Bainbridge MN, Tan TY, Wangler MF, Scheuerle AE, Zackaie EH, et al. 2014. De novo truncating mutations in AHDC1 in individuals with syndromic expressive language delay, hypotonia, and sleep apnea. Am J Hum Genet 94: 784-789.
68. Türkmen S, Demirhan O, Hoffman K, Diers A, Zimmer C, Sperling K, et al. 2006. Cerebellar hypoplasia and quadrupedal locomotion in humans as a recessive trait mapping to chromosome 17p. J Med Genet 43: 461-464.
69. De Lima Garcias G, De Graça Martino Roth M. 2009. A Brazilian family with quadrupedal gait, severe mental retardation, coarse facial characteristics, and hirsutism. Int J Neurosci 117: 927-933.
70. Komara M, John A, Suleiman J, Ali BR, Al-Gazali L. 2016. Clinical and molecular delineation of disequilibrium syndrome type 2 and profound sensorineural hearing loss in an inbred Arab family. Am J Med Genet A 170: 540-543.
71. Wraith JE, Rogers JG, Danks DM. 1987. The mucopolysaccharidoses. Aust Paediatr J 23: 329-334.
72. Cleary MA, Wraith JE. 1995. The presenting features of mucopolysaccharidosis type IH. Acta Paediatr 84: 337-339.
73. Ockerman PA. 1969. Mannosidosis: isolation of oligosaccharide storage material from brain. J Pediatr. 75: 360-365.
74. Ockerman PA, Autio S, Norden NE. 1973. Diagnosis of mannosidosis. Lancet 1: 7796-7798.
75. Bach G, Kohn G, Lasch EE, El Massri M, Ornoy A, Sekeles E, et al. 1978. A new variant of mannosidosis with increased residual enzymatic activity and mild clinical manifestation. Pediatr Res 12: 10101-1015.
76. Press OW, Fingert H, Lott IT, Dickersin CR. 1983. Pacytopenia in mannosidosis. Arch Intern Med 143: 1266-1268.
77. Michaelakakis H, Dimitriou E, Mylona-Karayanni C, Bartsocas CS. 1992. Phenotypic variability of mannosidosis type II: report of two Greek siblings. Genet Couns 3: 195-199.
78. Bennet JK, Dembure PP, Elsas LJ. 1995. Clinical and biochemical analysis of two families with type I and type II manossidosis. Am J Med Genet 55: 21-26.
79. Gotoda Y, Wakamatsu N, Kawai H, Nishida Y, Matsumoto T.1998. Missense and nonsense mutations in the lysosomal alpha mannosidase gene (MANB) in severe and mild forms of alpha-mannosidosis. Am J Hum Genet 63: 1015-1024.
80. Gutschalk A, Harting I, Cantz M, Springer C, Rohrschneider K, Meinck HM. 2004. Adult alpha-mannosidosis: clinical progression in the absence of demyelination. Neurology 63: 1744-1746.
81. Verkerk AJ, Schot R, Dumee B, Schellekens K, Swagemakers S, Bertoli-Avella AM, et al. 2009. Mutation in the AP4M1 gene provides a model for neuroaxonal injury in cerebral palsy. Am J Hum Genet 85: 40-52.
82. Tüysüz B, Bilguvar K, Koçer N, Yalçınkaya C, Çağlayan O, Gül E, et al. 2014. Autosomal recessive spastic tetraplegia caused by AP4M1 and AP4B1 gene mutation: expansion of the facial and neuroimaging features. Am J Med Genet A 164: 1677-1685.
83. Türkmen S, Guo G, Garshasbi M, Hoffmann K, Alshalah AJ, Mischung C, et al. 2009. CA8 mutations cause a novel syndrome characterized by ataxia and mild mental retardation with predisposition to quadrupedal gait. PLoS Genet 5: e1000487.
84. Onat OE, Gulsuner S, Bilguvar K, Nazli Basak A, Topaloglu H, Tan M, et al. 2013. Missense mutation in the ATPase, aminophospholipid transporter protein ATP8A2 is associated with cerebellar atrophy and quadrupedal locomotion. Eur J Hum Genet 21: 281-285.
85. Priest JM, Fischbeck KH, Nouri N, Keats BJ. 1995. A locus for axonal motor-sensory neuropathy with deafness and mental retardation maps to Xq24-q26. Genomics 29: 409-412.
86. Fowler B, Schutgens RB, Rosenblatt DS, Smit GP, Lindemans J. 1997. Folate-responsive homocystinuria and megaloblastic anaemia in a female patient with functional methionine synthase deficiency (cbIE disease). J Inherit Metab Dis 20: 731-741.
87. Zavadáková P, Fowler B, Suormala T, Novotna Z, Mueller P, Hennermann JB, et al. 2005. cbIE type of homocystinuria due to methionine synthase reductase deficiency: functional correction by minigene expression. Hum Mutat 25: 239-247.
88. Page T, Nyhan WL, Morena de Vega V. 1987. Syndrome of mild mental retardation, spastic gait, and skeletal malformations in a family with partial deficiency of hypoxanthine-guanine phosphoribosyltransferase. Pediatrics 79: 713-717.
89. Hladnik U, Nyhan WL, Bertelli M. 2008. Variable expression of HPRT deficiency in 5 members of a family with the same mutation. Arch Neurol 65: 1240-1243.
90. Sarafoglou K, Grosse-Redlinger K, Boys CJ, Charnas L, Otten N, Broock R, et al. 2010. Lesch-Nyhan variant syndrome: variable presentation in 4 affected family members. Arch Neurol 67: 761-764.
91. Barel O, Shorer Z, Flusser H, Ofir R, Narkis G, Finer G, et al. 2008. Mitochondrial complex III deficiency associated with a homozygous mutation in UQCRQ. Am J Hum Genet 82: 1211-1216.
92. Molinari F, Rio M, Meskenaite V, Encha-Razavi F, Augé J, Bacq D, et al. 2002. Truncating neurotrypsin mutation in autosomal recessive nonsyndromic mental retardation. Science 298: 1779-1781.
93. Najmabadi H, Hu H, Garshasbi M, Zemojtel T, Abedini SS, Chen W, Hosseini M, et al. 2011. Deep sequencing reveals 50 novel genes for recessive cognitive disorders. Nature 478: 57-63.
94. Halevy A, Basel-Vanagaite L, Shuper A, Helman S, Har-Zahav A, Birk E, et al. 2012. Microcephaly-thin corpus callosum maps to 8q23.2-q24.12. Pediatr Neurol 46: 363-368.
95. Robinson BH, MacKay N, Petrova-Benedict R, Ozalp I, Coskun T, Stacpoole PW. 1990. Defects in the E2 lipoyl transacetylase and the X-lipoyl containing component of the pyruvate dehydrogenase complex in patients with lactic acidemia. J Clin Invest 85: 1821-1824.
96. Head RA, Brown RM, Zolkipli Z, Shahdadpuri R, King MD, Clayton PT, et al. 2005. Clinical and genetic spectrum of pyruvate dehydrogenase deficiency: dihydrolipoamide acetyltransferase (E2) deficiency. Ann Neurol 58: 234-241.
97. Reid E, Dearlove AM, Rhodes M, Rubinsztein DC. 1999. A new locus for autosomal dominant “pure” hereditary spastic paraplegia mapping to chromosome 12q13, and evidence for further genetic heterogeneity. Am J Hum Genet 65: 757-763.
98. Fichera M, Lo Giudice M, Falco M, Sturnio M, Amata S, Calabrese O, et al. 2004. Evidence of kinesin heavy chain (KIF5A) involvement in pure hereditary spastic paraplegia. Neurology 63: 1108-1110.
99. Blair MA, Ma S, Hedera P. 2006. Mutation in KIF5A can also cause adult-onset hereditary spastic paraplegia. Neurogenetics 7: 47-50.
100. Crimella C, Baschirotta C, Arnoldi A, Tonelli A, Tenderini E, Airoldi G, et al. 2012. Mutations in the motor and stalk domains of KIF5A in spastic paraplegia type 10 and in axonal Charcot-Marie-Tooth type 2. Clin Genet 82: 157-164.
101. Carosi L, Lo Giudice T, Li Lullo M, Lombardi F, Babalini C, Gaudiello F, et al. 2015. Hereditary spastic paraplegia: a novel mutation and expansion of the phenotype variability in SPG10. J Neurol Neurosurg Psychiatry 86: 702-704.
102. Shimazaki H, Takiyama Y, Ishiura H, Sakai C, Matsushima Y, Hatakeyama H, et al. 2012. A homozygous mutation of C12orf65 causes spasitic paraplegia with optic atrophy and neuropathy (SPG55). J Med Genet 49: 777-784.
103. Buchert R, Uebe S, Radwan F, Tawamie H, Issa S, Shimazaki H, et al. 2013. Mutations in the mitochondrial gene C12ORF65 lead to syndromic autosomal recessive intellectual disability and show genotype phenotype correlation. Eur J Med Genet 56: 599-602.
104. MacDermot KD, Walker RW. 1987. Autosomal recessive hereditary motor and sensory neuropathy with mental retardation, optic atrophy and pyramidal signs. J Neurol Neurosurg Psychiatry 50: 1342-1347.
105. Spiegel R, Mandel H, Saada A, Lerer I, Burger A, Shaag A, et al. 2014. Delineation of C12orf65-related phenotypes: a genotype-phenotype relationships. Eur J Hum Genet 22: 1019-1025.
106. Novarino G, Fenstermaker AG, Zaki MS, Hofree M, Silhavy JL, Heiberg AD, et al. 2014. Exome sequencing links corticospinal motor neuron disease to common neurodegenerative disorders. Science 343: 506-511.
107. Lise S, Clarkson Y, Perkins E, Kwasniewska A, Sadighi Akha E, Schnekenberg RP, et al. 2012. Recessive mutations in SPTBN2 implicate beta-III spectrin in both cognitive and motor development. PLoS Genet 8: e1003074.
108. Elsayed SM, Heller R, Thoenes M, Zaki MS, Swan D, Elsobky E, et al. 2014. Autosomal dominant SCA5 and autosomal recessive infantile SCA are allelic conditions resulting from SPTBN2 mutations. Eur J Hum Genet 22: 286-288.
109. Yoshida T, Tada K, Honda Y, Arakawa T. 1971. Urocanic aciduria: a defect in the urocanase activity in the liver of a mentally retarded. Tohoku J Exp Med 104: 305-312.
110. Kalafatic Z, Lipovac K, Jezerinac Z, Juretic D, Dumic M, Zurga B, et al. 1980. A liver urocanase deficiency. Metabolism 29: 1013-10119.
111. Espinós C, Pineda M, Martínez-Rubio D, Lupo V, Ormazabal A, Vilaseca MA, et al. 2009. Mutations in the urocanase gene UROC1 are associated with urocanic aciduria. J Med Genet 46: 407-411.
112. Toydemir RM, Brassington AE, Bayrak-Toydemir P, Krakowiak PA, Jorde LB, Whitby FG, et al. 2006. A novel mutation in FGFR3 causes camptodactyly, tall stature, and hearing loss (CATSHL) syndrome. Am J Hum Genet 79: 935-941.
113. Makrythanasis P, Temtamy S, Aglan MS, Otaify GA, Hamamy H, Antonarakis SE. 2014. A novel homozygous mutation in FGFR3 causes tall stature, severe lateral tibial deviation, scoliosis, hearing impairment, camptodactyly, and arachnodactyly. Hum Mutat 35: 959-963.
114. Austin-Ward E, Castillo S, Cuchacovich M, Espinoza A, Cofré-Beca J, González S, et al. 1998. Neonatal lupus syndrome: a case with chondrogysplasia punctata and other unusual manifestations. J Med Genet 35: 695-697.
115. Sheffield LJ, Danks DM, Mayne V, Hutchison AL. 1976. Chondrodysplasia punctate-23 cases of a mild and relatively common variety. J Pediatr 89: 916-923.
116. Maroteaux P. 1989. Brachytelephalangic chondrodysplasia punctate: a possible X-linked recessive form. Hum Genet 82: 167-170.
117. Petit C, Melki J, Levilliers J, Serville F, Weissenbach J, Maroteaux P. 1990. An interstitial deletion in Xp22.3 in a family with X-linked recessive chondrodysplasia punctata and short stature. Hum Genet 85: 247-250.
118. Elçioglu N, Hall CM. 1998. Maternal systemic lupus erythematosus and chondrodysplasia punctata in two sibs: phenocopy or coincidence? J Med Genet 35: 690-694.
119. Collum LM. 1971. Uveal colobomata and other anomalies in three generations of one family. Br J Ophthalmol 55: 458-461.
120. Peters V, Penzien JM, Reiter G, Körner C, Hackler R, Assmann B, et al. 2002. Congenital disorder of glycosylation IId (CDG-IId) – a new entity: clinical presentation with Dandy-Walker malformation and myopathy. Neuropediatrics 33: 27-32
121. Guillard M, Morava E, de Ruijter J, Roscioli T, Penzien J, van den Heuvel L, et al. 2011. B4GALT1-congenital disorders of glycosylation presents as a non-neurologic glycosylation disorder with hepatointestinal involvement. J Pediatr 159
122. Kariminejad A, Bozorgmehr B, Ashrafi MR, Kariminejad MH. 2008. Skull defects, alopecia and dinstinctive facies: a new syndrome? Clin Dysmorphol 17: 203-205.
123. Kayserili H, Uz E, Niessen C, Vargel I, Alanay Y, Tuncbilek G, et al. 2009. ALX4 dysfunction disrupts craniofacial epidermal development. Hum Mol Genet 18: 4357-4366.
124. Kahrizi K, Najmabadi H, Kariminejad R, Jamali P, Malekpour M, Garshasbi M, et al. 2009. An autosomal recessive syndrome of severe mental retardation, cataract, coloboma and kyphosis maps to the pericentromeric region of chromosome 4. Eu
125. Saba TG, Montpetit A, Verner A, Rioux P, Hudson TJ, Drouin R, et al. 2005. An atypical form of erythrokeratodermia variabilis maps to chromosome 7q22. Hum Genet 116: 167-171.
126. Montpetit A, Côté S, Brustein E, Drouin CA, Lapointe L, Boudreau M, et al. 2008. Disruption of AP1S1, causing a novel neurocutaneous syndrome, perturbs development of the skin and spinal cord. PLoS Genet 4: e1000296.
127. Field M, Tarpey PS, Smith R, Edkins S, O’Meara S, Stevens C, et al. 2007. Mutations in the BRWD3 gene cause X-linked mental retardation associated with macrocephaly. Am J Hum Genet 81: 367-374.
128. Hussein MS, Baig SM, Neumann S, Nürnberg G, Farooq M, Ahmad I, et al. 2012. A truncating mutation of CEP135 causes primary microcephaly and disturbed centrosomal function. Am J Hum Genet 90: 871-878.
129. Farooq M, Fatima A, Mang Y, Hansen L, Kjaer KW, Baig SM, et al. 2016. A novel splice site mutation in CEP135 is associated with primary microcephaly in a Pakistani family. J Hum Genet 61: 271-273.
130. Shaheen R, Ansari S, Alshammari MJ, Alkhalidi H, Alrukban H, Eyaid W, et al. 2013. A novel syndrome of hypohidrosis and intellectual disability is linked to COG6 deficiency. J Med Genet 50: 431-436.
131. Tournev I, Kalaydijeva L, Youl B, Ishpekova B, Guergueltcheva V, Kamenov O, et al. 1999. Congenital cataracts facial dysmorphism neuropathy syndrome, a novel complex genetic disease in Balkan Gypsies: clinical and electrophysiological o
132. Müller-Felber W, Safiriou D, Scheck R, Pätzke I, Toepfer M, Pongratz DE, et al. 1998. Marinescoe Sjögren syndrome with rhabdomuoloysis. A new subtype of the disease. Neuropediatrics 29: 97-101.
133. Merlini L, Gooding R, Lochmüller H, Müller-Felber W, Walkter MC, Angelicheva D, et al. 2002. Genetic identity of Marinesco-Sjögren/myoglobinuria and CCFDN syndromes. Neurology 58: 231-236.
134. Yanagisawa A, Bouchet C, Van den Bergh PY, Cuisset JM, Viollet L, Leturcq F, et al. 2007. New POMT2 mutations causing congenital muscular dystrophy: identification of a founder mutation. Neurology 69: 1254-1260.
135. Godfrey C, Clement E, Mein R, Brockington M, Smith J, Talim B, et al. 2007. Refining genotype phenotype correlations in muscular dystrophies with defective glycosylation of dystroglycan. Brain 130: 2725-2735.
136. Mercuri E, Messina S, Bruno C, Mora M, Peforaro E, Comi GP, et al. 2009. Congenital muscular dystrophies with defective glycosylation of dystroglycan: a population study. Neurology 72: 1802-1809.
137. Yanagisawa A, Bouchet C, Quijano-Roy S, Vuillaumier-Barrot S, Clarke N, Odent S, et al. 2009. POMT2 intragenic deletions and splicing abnormalities causing congenital muscular dystrophy with mental retardation. Eur J Med Genet 52: 201-2
138. Martinez HR, Craigen WJ, Ummat M, Adesina AM, Lotze TE, Jefferies JL. 2014. Novel cardiovascular findings in association with a POMT2 mutation: three siblings with α-dystroglycanopathy. Eur J Hum Genet 22: 486-491.
139. Longman C, Brockington M, Torelli S, Jimenez-Mallebrera C, Kennedy C, Khalil N, et al. 2003. Mutations in the human LARGE gene cause MDC1D, a novel form of congenital muscular dystrophy with severe mental retardation and abnormal glycos
140. Clement E, Mercuri E, Godfrey C, Smith J, Robb S, Kinali M, et al. 2008. Brain involvement in muscular dystrophies with defective dystroglycan glycosylation. Ann Neurol 64: 573-582.
141. Clarke NF, Maugenre S, Vandebrouck A, Urtizberea JA, Willer T, Peat RA, et al. 2011. Congenital muscular dystrophy type 1D (MDC1D) due to a large intragenic insertion/deletion, involving intron 10 of the LARGE gene. Eur J Hum Genet 19:
142. Schurrs-Hoeijmakers JH, Geraghty MT, Kamsteeg EJ, Ben-Salem S, de Bot ST, Nijhof B, et al. 2012. Mutations in DDHD2, encoding an intracellular phospholipase A(1), cause a recessive form of complex hereditary spastic paraplegia. Am J Hum
143. Gonzalez M, Nampoothiri S, Kornblum C, Oteyza AC, Walter J, Konidari I, et al. 2013. Mutations in phospholipase DDHD2 cause autosomal recessive hereditary spastic paraplegia (SPG54). Eur J Hum Genet 21: 1214-1218.
144. Novarino G, Fenstermaker AG, Zaki MS, Hofree M, Silhavy JL, Heiberg AD, et al. 2014. Exome sequencing links corticospinal motor neuron disease to common neurodegenerative disorders. Science 343: 506-511.
145. Koehler K, Malik M, Mahmood S, Gieβelmann S, Beetz C, Hennings JC, et al. 2013. Mutations in GMPPA cause a glycosylation disorder characterized by intellectual disability and autonomic dysfunction. Am J Hum Genet 93: 727-734.
146. Najmabadi H, Hu H, Garshasbi M, Zemojtel T, Abedini SS, Chen W, et al. 2011. Deep sequencing reveals 50 novel genes for recessive cognitive disorders. Nature 478: 57-63.
147. Harville HM, Held S, Diaz-Font A, Davis EE, Diplas BH, Lewis RA, et al. 2010. Identification of 11 novel mutations in either BBS genes by high-resolution homozygosity mapping. J Med Genet 47: 262-267.
148. Arant BS, Brackett NC Jr, Young RB, Still WJ. 1970. Case studies of siblings with juxtaglomerular hyperplasia and secondary aldosteronism associated with severe azotemia and renal rickets—Bartter’s syndrome or disease? Pediatrics 46: 34
149. Erkelens DW, Statius van Eps LW. 1973. Bartter’s syndrome and erythrocytosis. Am J Med 55: 711-719.
150. Dillon MJ, Shah V, Mitchell MD. 1979. Bartter’s syndrome: 10 cases in childhood. Results of long-term indomethacin therapy. Q J Med 48: 429-446.
151. Kurtz I, Maher T, Jones JW, Sutton JM, Schambelan M, Hulter HN, et al. 1981. Familial chloride-resistant renal alkalosis and hypokalemia with fasting hypercalciuria and medullary nephrocalcinosis: a unique variant of Bartter’s syndrome
152. Stoff JS, Stemerman M, Steer M, Salzman E, Brown RS. 1980. A defect in platelet aggregation in Bartter’s syndrome. Am J Med 68: 171-180.
153. Baehler RW, Work J, Kotchen TA, McMorrow G, Guthrie G. 1980. Studies on the pathogenesis of Bartter’s syndrome. Am J Med 69: 933-938.
154. Ruvalcaba RH, Martinez FE. 1992. Case report: familial growth hormone deficiency associated with Bartter’s syndrome. Am J Med Sci 303: 411-414.
155. Smilde TJ, Haverman JF, Schipper P, Hermus AR, van Liebergen FJ, Jansen JL, et al. 1994. Familial hypokalemia/hypomagnesemia and chondrocalcinosis. J Rheumatol 21: 1515-1519.
156. Simon DB, Bindra RS, Mansfield TA, Nelson-Williams C, Mendonca E, Stone R, Schurman S, et al. 1997. Mutations in the chloride channel gene, CLCNKB, cause Bartter’s syndrome type III. Nat Genet 17: 171-178.
157. Fukuyama S, Hiramatsu M, Akagi M, Higa M, Ohta T. 2004. Novel mutations of the chloride channel Kb gene in two Japanese patients clinically diagnosed as Bartter syndrome with hypocalciuria. J Clin Endocrinol Metab 89: 5847-5850.
158. Sun H, Demirci H, Shields CL, Shields, JA. 2005. Sclerochoroidal calcification in a patient with classic Bartter’s syndrome Am J Ophthalmol 139: 365-366.
159. Ura S, Hayashi YK, Goto K, Astejada MN, Murakami T, Nagato M, et al. 2007. Limb-girdle muscular dystrophy due to emerin gene mutations. Arch Neurol 64: 1038-1041.
160. Buckley AE, Dean J, Mahy IR. 1999. Cardiac involvement in Emergy Dreifuss muscular dystrophy: a case series. Heart 82: 105-108.
161. Dubowitz V. 1973. Ridid spine syndrome: a muscle syndrome in search of a name. Proc R Soc Med 66: 219-220.
162. Thomas PK, Calne DB, Elliott CF. 1972. X-linked scapuloperoneal syndrome. J Neurol Neurosurg Psychiatry 35: 208-215.
163. Mawatari S, Katayama K. 1973. Scapuloperoneal muscular atrophy with cardiopathy. An X-linked recessive trait. Arch Neurol 28: 55-59.
164. Dickey RP, Ziter FA, Smith RA. 1984. Emery-Dreifuss muscular dystrophy. J Pediatr 104: 555-559.
165. Dreifuss FE, Hogan GR. 1961. Survival in X-chromosomal muscular dystrophy. Neurology 11: 734-737.
166. De Pontual L, Yao E, Callier P, Faivre L, Drouin V, Cariou S, et al. 2011. Germline deletion of the miR-17~92 cluster causes skeletal and growth defects in humans. Nat Genet 43: 1026-1030.
167. Arakawa T, Ohara K, Takahashi Y, Ogasawara J, Hayashi T, Chiba R, et al. 1965. Formininotransferase-deficiency syndrome: a new inborn error of folic acid metabolism. Ann Paediatr 205: 1-11.
168. Arakawa T, Fujii M, Ohara K. 1966. Erythrocyte formiminotransferase activity in formininotransferase deficiency syndrome. Tohoku J Exp Med 88: 195-202.
169. Niederwieser A, Giliberti P, Matasović A, Pluznik S, Steinmann B, Baerlocher K. 1974. Folic acid non-dependent formininoglutamic aciduria in two siblings. Clin Chim Acta 54: 293-316.
170. Perry TL, Applegarth DA, Evans ME, Hansen S, Jellum E. 1975. Metabolic studies of a family with massive formiminoglutamic aciduria. Pediatr Res 9: 117-122.
171. McNicholl B, Egan B. 1968. Congenital pernicious anemia: effects on growth, brain, and absorption of B12. Pediatrics 42: 149-156.
172. Katz M, Lee SK, Cooper BA. 1972. Vitamin B 12 malabsorption due to a biologically inert intrinsic factor. N Engl J Med 287: 425-429.
173. Carmel R. 1983. Gastric juice in congenital pernicious anemia contains no immunoreactive intrinsic factor molecular: study of three kindreds with variable ages at presentation, including a patient first diagnosed in adulthood. Am J Hum
174. Remacha AF, Sambeat MA, Barceló MJ, Mones J, García-Die J, Gimferrer E. 1992. Congenital intrinsic factor deficiency in a Spanish patient. Ann Hematol 64: 202-204.
175. Lee JE, Silhavy JL, Zaki MS, Schroth J, Bielas SL, Marsh SE, et al. 2012. CEP41 is mutated in Joubert syndrome and is required for tubulin glutamylation at the cilium. Nat Genet 44: 193-199.
176. Joubert M, Eisenring JJ, Robb JP, Andermann F. 1969. Familial agenesis of the cerebellar vermis. A syndrome of episodic hyperpnea, abnormal eye movements, ataxia, and retardation. Neurology 19: 813-825.
177. Srour M, Schwartzentruber J, Hamdan FF, Ospina LH, Patry L, Labuda D, et al. 2012. Mutations in C5ORF42 cause Joubert syndrome in the French Canadian population. Am J Hum Genet 90: 693-700.
178. Higgins JJ, Rosen DR, Loveless JM, Clyman JC, Grau MJ. 2000. A gene for nonsyndromic mental retardation maps to chromosome 3p25-pter. Neurology 55: 335-340.
179. Alazami AM, Hijazi H, Al-Dosari MS, Shaheen R, Hashem A, Aldahmesh MA, et al. 2013. Mutation in ADAT3, encoding adenosine deaminase acting on transfer RNA, causes intellectual disability and strabismus. J Med Genet 50: 425-430.
180. Ropers F, Derivery E, Hu H, Garshasbi M, Karbasiyan M, Herold M, et al. 2011. Identification of a novel candidate gene for non-syndromic autosomal recessive intellectual disability: the WASH complex member SWIP. Hum Mol Genet 20: 2585-2
181. Hampshire DJ, Ayub M, Springell K, Roberts E, Jafri H, Rashid Y, et al. 2006. MORM syndrome (mental retardation, truncal obesity, retinal dystrophy and micropenis), a new autosomal recessive disorder, links to 9q34. Eur J Hum Genet 14:
182. Genin A, Desir J, Lambert N, Biervliet M, Van Der Aa N, Pierquin G, et al. 2012. Kinetochore KMN network gene CASC5 mutated in primary microcephaly. Hum Mol Genet 21: 5306-5317.
183. Girot R, Hamet M, Perignon JL, Guesnu M, Fox RM, Cartier P, et al. 1983. Cellular immune deficiency in two siblings with hereditary orotic aciduria. N Engl J Med 308: 700-704.
184. Winsnes A, Monn E, Stokke O, Feyling T. 1979. Congenital persistent proximal type renal tubular acidosis in two brothers. Acta Paediatr Scand 68: 861-868.
185. Braverman DE, Snyder WE. 1987. A case report and review of band keratopathy. Metab Pediat Syst Ophthal 10: 39-41.
186. Igarashi T, Ishii T, Watanabe K, Harakawa H, Horio K, Sone Y, et al. 1994. Persistent isolated proximal rental tubular acidosis—a systemic disease with a distinct clinical entity. Pediatr Nephrol 8: 70-71.

## Sheet: Table_5
Table 5. SFARI ratings (applicable only to autism-related genes), estimates of ID severity, additional supporting sources for CFD and NLF
in respective conditions.
Condition	OMIM#	Subgroup	SFARI Rating (S = syndromic)	ID Severity	Add. Support Source CFD	Add. Support Source NLF
CHARGE Syndrome	214800	AUT/CFD	S	mild	HPO	N/A
Cohen Syndrome	216550	AUT/CFD	S	mild to moderate	HPO	N/A
Glass Syndrome	612313	AUT/CFD	none	moderate to severe	HPO	N/A
Fragile X Mental Retardation Syndrome	300624	AUT/CFD	S	mild to severe	HPO	N/A
Helsmoortel-Van der AA Syndrome	615873	AUT/CFD	1S	mild to severe	HPO	N/A
Kleefstra Syndrome	610253	AUT/CFD	3S	moderate to severe	HPO	N/A
Lujan-Fryns Syndrome	309520	AUT/CFD	none	mild to moderate	HPO	N/A
Mental Retardation with Language Impairment and with or without Autistic Features	613670	AUT/CFD	none	mild to moderate	HPO	N/A
Mental Retardation, Autosomal Dominant 1	156200	AUT/CFD	3S	moderate to severe	HPO	N/A
Mental Retardation, Autosomal Dominant 23	615761	AUT/CFD	1S	moderate to severe	HPO	N/A
Mental Retardation, Autosomal Dominant 24	615828	AUT/CFD	2S	moderate to severe	HPO	N/A
Mental Retardation, Autosomal Dominant 30	616083	AUT/CFD	none	mild to severe	HPO	N/A
Mental Retardation, X-linked, Syndromic 14	300676	AUT/CFD	S	mild to severe	HPO	N/A
Mental Retardation, X-linked, Syndromic, Wu Type	300699	AUT/CFD	none	mild to moderate	HPO	N/A
Mowat-Wilson Syndrome	235730	AUT/CFD	none	moderate to severe	HPO	N/A
Mucopolysaccharidosis, Type IIIA	252900	AUT/CFD	S	moderate to severe	HPO	N/A
Nicolaides-Baraitser Syndrome	601358	AUT/CFD	S	severe	HPO	N/A
Phelan-McDermid Syndrome	606232	AUT/CFD	1S	mild to severe	HPO	N/A
Schaaf-Yang Syndrome	615547	AUT/CFD	2S	moderate	HPO	N/A
Smith-Magenis Syndrome	182290	AUT/CFD	S	mild to moderate	HPO	N/A
Temtamy Syndrome	218340	AUT/CFD	none	moderate to severe	HPO	N/A
Wiedemann-Steiner Syndrome	605130	AUT/CFD	2S	mild to moderate	HPO	N/A
Adenylosuccinase Deficiency	103050	AUT/CFD/NLF	S	severe	HPO	HPO
Alpha-thalassemia/Mental Retardation Syndrome, X-linked	301040	AUT/CFD/NLF	none	severe	HPO	HPO
Angelman Syndrome	105830	AUT/CFD/NLF	3S	severe	HPO	HPO
Cardiofaciocutaneous Syndrome 1	115150	AUT/CFD/NLF	S	moderate to severe	HPO	HPO
Cerebral Creatine Deficiency 1	300352	AUT/CFD/NLF	none	mild to severe	HPO	HPO
Cornelia de Lange Syndrome	122470	AUT/CFD/NLF	S	moderate to profound	HPO	HPO
Lubs X-linked Mental Retardation Syndrome (MECP2 Duplication Syndrome included)	300260	AUT/CFD/NLF	S	severe to profound	HPO	HPO
Marshall-Smith Syndrome	602535	AUT/CFD/NLF	S	moderate to severe	HPO	HPO
Mental Retardation, X-linked 98	300912	AUT/CFD/NLF	none	moderate to severe	HPO	HPO
Mental Retardation, X-linked, Syndromic, Christianson Type	300243	AUT/CFD/NLF	S	profound	HPO	HPO
Myhre Syndrome	139210	AUT/CFD/NLF	none	mild to moderate	HPO	Bachmann-Gagescu et al. 2011
Pitt-Hopkins Syndrome	610954	AUT/CFD/NLF	S	moderate to severe	HPO	Zweier et al. 2008
Renpenning Syndrome 1	309500	AUT/CFD/NLF	none	moderate to severe	HPO	HPO
Smith-Lemli-Opitz Syndrome	270400	AUT/CFD/NLF	S	mild to moderate	HPO	HPO
Tritchothiodystrophy 4, Nonphoto-sensitive	234050	AUT/CFD/NLF	none	mild to moderate	HPO	HPO
Warburg Micro Syndrome 4	615663	AUT/CFD/NLF	none	severe	HPO	HPO
Cerebral Creatine Deficiency Syndrome 2	612736	AUT/NLF	none	severe	N/A	HPO
Epileptic Encephalopathy, Early Infantile, 4	612164	AUT/NLF	3S	severe to profound	N/A	HPO
Epileptic Encephalopathy, Early Infantile, 6	607208	AUT/NLF	S	mild to severe	N/A	HPO
Myotonic Dystrophy 1	160900	AUT/NLF	none	mild	N/A	HPO
Neurodegeneration due to Cerebral Folate Transport Deficiency	613068	AUT/NLF	none	severe	N/A	HPO
Rett Syndrome	312750	AUT/NLF	S	mild to profound	N/A	HPO
Rett Syndrome, Congenital	613454	AUT/NLF	none	severe	N/A	HPO
Arthrogryposis, Mental Retardation, and Seizures	615553	AUT/SFD	none	severe	N/A	N/A
Mental Retardation, Autosomal Recessive 38	615516	AUT/SFD	S	severe	N/A	N/A
Mental Retardation, X-linked 72	300271	AUT/SFD	none	mild to severe	N/A	N/A
Lowe Oculocerebral Syndrome 1	309000	AUT/SFD/NLF	S	moderate	N/A	HPO
Norrie Disease	310600	AUT/SFD/NLF	none	mild to moderate	N/A	HPO
Tuberous Sclerosis 2	613254	AUT/SFD/NLF	S	mild to severe	N/A	Sarnat et al. 2015
Brunner Syndrome	300615	AUT/NONE	none	mild	N/A	N/A
Cerebral Creatine Deficiency Syndrome 3	612718	AUT/NONE	S	mild to moderate	N/A	N/A
Epileptic Encephalopathy, Childhood Onset	615369	AUT/NONE	2S	moderate to severe	N/A	N/A
Epileptic Encephalopathy, Early Infantile, 24	615871	AUT/NONE	S	moderate to severe	N/A	N/A
Epileptic Encephalopathy, Early Infantile, 9	300088	AUT/NONE	S	mild to profound	N/A	N/A
Mental Retardation, Autosomal Dominant 5	612621	AUT/NONE	1S	moderate to severe	N/A	N/A
Mental Retardation, Autosomal Recessive 3	608443	AUT/NONE	none	severe	N/A	N/A
Muscular Dystrophy-Dystroglycanopathy (Congenital with Mental Retardation), Type B, 3 (Muscle-eye-brain disease)	613151	AUT/NONE	none	moderate to severe	N/A	N/A
Acromelic Frontonasal Dysostosis	603671	EPI/CFD	N/A	severe	HPO	N/A
Bohring-Opitz Syndrome	605039	EPI/CFD	N/A	profound	HPO	N/A
CK Syndrome	300831	EPI/CFD	N/A	mild to severe	HPO	N/A
Cutis Laxa, Autosomal Recessive, Type IIA	219200	EPI/CFD	N/A	mild to severe	HPO	N/A
Hyperphosphatasia with Mental Retardation Syndrome 4	615716	EPI/CFD	N/A	severe	HPO	N/A
Hypoparathyroidism-retardation-dysmorphism Syndrome	241410	EPI/CFD	N/A	mild to severe	HPO	N/A
Koolen-De Vries Syndrome	610443	EPI/CFD	N/A	moderate to severe	HPO	N/A
Mandibulofacial Dysostosis, Guion-Almeida Type	610536	EPI/CFD	N/A	mild to moderate	HPO	N/A
Mental Retardation, Autosomal Recessive 41	615637	EPI/CFD	N/A	mild to moderate	HPO	N/A
Mental Retardation, X-linked 30	300558	EPI/CFD	N/A	moderate to severe	HPO	N/A
Mental Retardation, X-linked, Syndromic, Snyder-Robinson Type	309583	EPI/CFD	N/A	mild to moderate	HPO	N/A
Microcephaly, Short Stature, and Impaired Glucose Metabolism	616033	EPI/CFD	N/A	mild	HPO	N/A
Psychomotor Retardation, Epilepsy, and Craniofacial Dysmorphism	614501	EPI/CFD	N/A	severe	HPO	N/A
Seckel Syndrome 1	210600	EPI/CFD	N/A	moderate to severe	HPO	N/A
Aspartylglucosaminuria	208400	EPI/CFD/NLF	N/A	severe	HPO	HPO
Baraitser-Winter Syndrome 1	243310	EPI/CFD/NLF	N/A	mild to severe	HPO	Di Donato et al. 2016
Coloboma, Congenital Heart Disease, Ichthyosiform Dermatosis, Mental Retardation, and Ear Anomalies Syndrome	280000	EPI/CFD/NLF	N/A	moderate to severe	HPO	HPO
Congenital Disorder of Glycosylation, Type Ie	608799	EPI/CFD/NLF	N/A	severe	HPO	HPO
Congenital Disorder of Glycosylation, Type IIa	212066	EPI/CFD/NLF	N/A	severe	HPO	Alkuraya 2010
Cutis Laxa, Autosomal Recessive, Type IIIA	219150	EPI/CFD/NLF	N/A	moderate to severe	HPO	HPO
Desmosterolosis	602398	EPI/CFD/NLF	N/A	severe	HPO	HPO
Galactosialidosis	256540	EPI/CFD/NLF	N/A	mild to moderate	HPO	Hahn et al. 1998
Leukoencephalopathy, Cystic, without Megalencephaly	612951	EPI/CFD/NLF	N/A	severe	HPO	HPO
Megalencephaly-polymicrogyria-polydactyly-hydrocephalus Syndrome 1	603387	EPI/CFD/NLF	N/A	severe to profound	HPO	Dagli et al. 2008
Mental Retardation, X-linked, Syndromic, Cabezas Type	300354	EPI/CFD/NLF	N/A	moderate to severe	HPO	HPO
Microcephaly, Progressive, with Seizures and Cerebral and Cerebellar Atrophy	615760	EPI/CFD/NLF	N/A	profound	HPO	HPO
Microhydranencephaly	605013	EPI/CFD/NLF	N/A	severe	HPO	HPO
Mitochondrial DNA Depletion Syndrome 13 (Encephalomyopathic Type)	615471	EPI/CFD/NLF	N/A	severe	HPO	HPO
Multiple Congenital Anomalies-hypotonia-seizures Syndrome 2	300868	EPI/CFD/NLF	N/A	severe	HPO	HPO
Pontocerebellar Hypoplasia, Type 10	615803	EPI/CFD/NLF	N/A	severe	HPO	HPO
Pseudo-TORCH Syndrome 1	251290	EPI/CFD/NLF	N/A	severe	HPO	HPO
Pyruvate Dehydrogenase E1-alpha Deficiency	312170	EPI/CFD/NLF	N/A	moderate to severe	HPO	HPO
Spastic Paraplegia 49, Autosomal Recessive	615031	EPI/CFD/NLF	N/A	moderate to severe	HPO	HPO
Vici Syndrome	242840	EPI/CFD/NLF	N/A	severe	HPO	Said et al. 2012
Warburg Micro Syndrome 3	614222	EPI/CFD/NLF	N/A	severe	HPO	HPO
Alternating Hemiplegia of Childhood 1	104290	EPI/NLF	N/A	mild to severe	N/A	HPO
Alternating Hemiplegia of Childhood 2	614820	EPI/NLF	N/A	mild to severe	N/A	HPO
Argininemia	207800	EPI/NLF	N/A	mild to severe	N/A	HPO
Ceroid Lipofuscinosis, Neuronal, 1	256730	EPI/NLF	N/A	severe	N/A	HPO
Congenital Disorder of Glycosylation, Type Ic	603147	EPI/NLF	N/A	mild to severe	N/A	HPO
Cortical Dysplasia, Complex, with Other Brain Malformations 1	614039	EPI/NLF	N/A	mild to severe	N/A	HPO
Cortical Dysplasia, Complex, with Other Brain Malformations 2	615282	EPI/NLF	N/A	severe	N/A	HPO
Encephalopathy, Acute, Infection-induced, Susceptibility to, 3	608033	EPI/NLF	N/A	mild to severe	N/A	HPO
Epilepsy, Progressive Myoclonic, 3, with or without Intracellular Inclusions	611726	EPI/NLF	N/A	severe	N/A	HPO
Epileptic Encephalopathy, Early Infantile, 5	613477	EPI/NLF	N/A	severe to profound	N/A	HPO
Epileptic Encephalopathy, Early Infantile, 7	613720	EPI/NLF	N/A	mild to profound	N/A	HPO
Epileptic Encephalopathy, Early Infantile, 8	300607	EPI/NLF	N/A	severe	N/A	HPO
GLUT1 Deficiency Syndrome 1	606777	EPI/NLF	N/A	mild to severe	N/A	HPO
Homocystinuria-megaloblastic Anemia, cb1G Complementation Type	250940	EPI/NLF	N/A	mild to severe	N/A	HPO
Hyperphosphatasia with Mental Retardation Syndrome 3	614207	EPI/NLF	N/A	severe	N/A	HPO
Ichthyosis, Spastic Quadriplegia, and Mental Retardation	614457	EPI/NLF	N/A	profound	N/A	HPO
Leukodystrophy, Hypomyelin-ating, 5	610532	EPI/NLF	N/A	mild to moderate	N/A	HPO
Malonyl-CoA Decarboxylase Deficiency	248360	EPI/NLF	N/A	mild to severe	N/A	Surendran et al. 2001
Megaloblastic Anemia due to Dihydrofolate Reductase Deficiency	613839	EPI/NLF	N/A	mild to profound	N/A	HPO
Microcephaly 2, Primary, Autosomal Recessive, with or without Cortical Malformations	604317	EPI/NLF	N/A	mild to moderate	N/A	HPO
Microcephaly, Seizures, and Developmental Delay	613402	EPI/NLF	N/A	severe	N/A	Poulton et al. 2013
Neurodegeneration with Brain Iron Accumulation 5	300894	EPI/NLF	N/A	mild	N/A	HPO
Pelizaeus-Merzbacher Disease	312080	EPI/NLF	N/A	mild	N/A	HPO
Phosphoglycerate Dehydrogenase Deficiency	601815	EPI/NLF	N/A	profound	N/A	HPO
Polymicrogyria with Seizures	614833	EPI/NLF	N/A	moderate to severe	N/A	HPO
Pontocerebellar Hypoplasia, Type 2D	613811	EPI/NLF	N/A	profound	N/A	HPO
Pontocerebellar Hypoplasia, Type 2E	615851	EPI/NLF	N/A	profound	N/A	HPO
Salt and Pepper Developmental Regression Syndrome	609056	EPI/NLF	N/A	profound	N/A	HPO
Schindler Disease, Type 1	609241	EPI/NLF	N/A	severe to profound	N/A	HPO
Spinocerebellar Ataxia, Autosomal Recessive 13	614831	EPI/NLF	N/A	mild to profound	N/A	HPO
Thiamine Metabolism Dysfunction Syndrome 2 (Biotin- or Thiamine-responsive Type)	607483	EPI/NLF	N/A	mild	N/A	HPO
Epileptic Encephalopathy, Early Infantile, 18	615476	EPI/SFD	N/A	severe to profound	N/A	N/A
Microcephaly 5, Primary, Autosomal Recessive	608716	EPI/SFD	N/A	mild to moderate	N/A	N/A
Congenital Disorder of Glycosylation, Type Is	300884	EPI/SFD/NLG	N/A	severe	N/A	Michaud et al. 2014; Dimassi et al. 2016
D-2-Hydroxyglutaric Aciduria 1	600721	EPI/SFD/NLG	N/A	mild to severe	N/A	Kölker et al. 2002
Hypermethioninemia due to Adenosine Kinase Deficiency	614300	EPI/SFD/NLG	N/A	severe	N/A	HPO
Pyruvate Dehydrogenase E3-binding Protein Deficiency	245349	EPI/SFD/NLG	N/A	severe	N/A	HPO
Spastic Paraplegia 18, Autosomal Recessive	611225	EPI/SFD/NLG	N/A	severe	N/A	HPO
Spinocerebellar Ataxia, Autosomal Recessive 12	614322	EPI/SFD/NLG	N/A	unknown	N/A	HPO
Cortical Dysplasia, Complex, with Other Brain Malformations 5	615763	EPI/NONE	N/A	moderate to severe	N/A	N/A
Epileptic Encephalopathy, Early Infantile, 19	615744	EPI/NONE	N/A	mild to moderate	N/A	N/A
Epilepsy, Nocturnal Frontal Lobe, 5	615005	EPI/NONE	N/A	mild to severe	N/A	N/A
Hydrocephalus, Nonsyndromic, Autosomal Recessive 1	236600	EPI/NONE	N/A	moderate to severe	N/A	N/A
Hyperlysinemia, Type I	238700	EPI/NONE	N/A	mild to severe	N/A	N/A
Hyperprolinemia, Type II	239510	EPI/NONE	N/A	mild	N/A	N/A
Mental Retardation, X-linked 96	300802	EPI/NONE	N/A	mild to moderate	N/A	N/A
Muscular Dystrophy-Dystroglycanopathy (Congenital with Mental Retardation), Type B, 14	615351	EPI/NONE	N/A	severe	N/A	N/A
Polymicrogyria with Optic Nerve Hypoplasia	613180	EPI/NONE	N/A	severe	N/A	N/A
Acrodysostosis 1 with or without Hormone Resistance	101800	ID/CFD	N/A	mild to severe	HPO	N/A
Alazami Syndrome	615071	ID/CFD	N/A	severe	HPO	N/A
Beaulieu-Boycott-Innes Syndrome	613680	ID/CFD	N/A	moderate	HPO	N/A
Corpus Callosum, Agenesis of, with Mental Retardation, Ocular Coloboma, and Micrognathia	300472	ID/CFD	N/A	mild to moderate	HPO	N/A
Craniofacial Dysmorphism, Skeletal Anomalies, and Mental Retardation Syndrome	213980	ID/CFD	N/A	mild	HPO	N/A
Desbuquois Dysplasia 2	615777	ID/CFD	N/A	moderate	HPO	N/A
Ehlers-Danlos Syndrome, Progeroid Type, 1	130070	ID/CFD	N/A	mild	HPO	N/A
Hamamy Syndrome	611174	ID/CFD	N/A	mild	HPO	N/A
Immunodeficiency-centromeric Instability-facial anomalies syndrome 2	614069	ID/CFD	N/A	mild to severe	HPO	N/A
Joubert Syndrome 14	614424	ID/CFD	N/A	severe	HPO	N/A
Lenz-Majewski Hyperostotic Dwarfism	151050	ID/CFD	N/A	moderate to severe	HPO	N/A
Mental Retardation, Autosomal Recessive 39	615541	ID/CFD	N/A	severe	HPO	N/A
Mental Retardation, Autosomal Recessive 45	615979	ID/CFD	N/A	mild to moderate	HPO	N/A
Mucolipidosis II Alpha/Beta	252500	ID/CFD	N/A	severe	HPO	N/A
Noonan Syndrome 4	610733	ID/CFD	N/A	unknown	HPO	N/A
Noonan Syndrome 8	615355	ID/CFD	N/A	mild	HPO	N/A
Orofaciodigital Syndrome V	174300	ID/CFD	N/A	unknown	HPO	N/A
Otofaciocervical Syndrome 1	166780	ID/CFD	N/A	mild	HPO	N/A
Otofaciocervical Syndrome 2	615560	ID/CFD	N/A	mild	HPO	N/A
Shprintzen-Goldberg Craniosyno-stosis Syndrome	182212	ID/CFD	N/A	mild to moderate	HPO	N/A
Skeletal Defects, Genital Hypoplasia, and Mental Retardation	612447	ID/CFD	N/A	severe	HPO	N/A
Xia-Gibbs Syndrome	615829	ID/CFD	N/A	mild to severe	HPO	N/A
Cerebellar Ataxia, Mental Retardation, and Dysequilibrium Syndrome 2	610185	ID/CFD/NLF	N/A	severe	HPO	HPO
Hurler Syndrome	607014	ID/CFD/NLF	N/A	severe	HPO	HPO
Mannosidosis, Alpha B, Lysosomal	248500	ID/CFD/NLF	N/A	mild to severe	HPO	HPO
Spastic Paraplegia 50, Autosomal Recessive	612936	ID/CFD/NLF	N/A	severe	HPO	HPO
Cerebellar Ataxia, Mental Retardation, and Dysequilibrium Syndrome 3	613227	ID/NLF	N/A	mild	N/A	HPO
Cerebellar Ataxia, Mental Retardation, and Dysequilibrium Syndrome 4	615268	ID/NLF	N/A	severe	N/A	HPO
Cowchock Syndrome	310490	ID/NLF	N/A	moderate	N/A	Sevrioukova 2016; NextProt Beta 2017
Homocystinuria-megaloblastic Anemia, cb1E Complementation Type	236270	ID/NLF	N/A	severe	N/A	HPO
Lesch-Nyhan Syndrome	300322	ID/NLF	N/A	moderate	N/A	HPO
Mitochondrial Complex III Deficiency, Nuclear Type 4	615159	ID/NLF	N/A	severe	N/A	HPO
Mental Retardation, Autosomal Recessive 1	249500	ID/NLF	N/A	moderate to severe	N/A	HPO
Mental Retardation, Autosomal Recessive 40	615599	ID/NLF	N/A	moderate to severe	N/A	HPO
Pyruvate Dehydrogenase E2 Deficiency	245348	ID/NLF	N/A	mild to profound	N/A	HPO
Spastic Paraplegia 10, Autosomal Dominant	604187	ID/NLF	N/A	mild to moderate	N/A	HPO
Spastic Paraplegia 55, Autosomal Recessive	615035	ID/NLF	N/A	mild to severe	N/A	HPO
Spastic Paraplegia 64, Autosomal Recessive	615683	ID/NLF	N/A	mild	N/A	HPO
Spinocerebellar Ataxia, Autosomal Recessive 14	615386	ID/NLF	N/A	mild to severe	N/A	HPO
Urocanase Deficiency	276880	ID/NLF	N/A	moderate to severe	N/A	HPO
Camptodactyly, Tall Stature, and Hearing Loss Syndrome	610474	ID/SFD	N/A	unknown	N/A	N/A
Chondrodys-plasia Punctata 1, X-linked Recessive	302950	ID/SFD	N/A	mild	N/A	N/A
Coloboma, Ocular, with or without Hearing Impairment, Cleft Lip/Palate, and/or Mental Retardation	120433	ID/SFD	N/A	mild to severe	N/A	N/A
Congenital Disorder of Glycosylation, Type IId	607091	ID/SFD	N/A	severe	N/A	N/A
Frontonasal Dysplasia 2	613451	ID/SFD	N/A	mild to moderate	N/A	N/A
Kahrizi Syndrome	612713	ID/SFD	N/A	severe	N/A	N/A
Mental Retardation, Enteropathy, Deafness, Peripheral Neuropathy, Ichthyosis, and Keratoderma	609313	ID/SFD	N/A	unknown	N/A	N/A
Mental Retardation, X-linked 93	300659	ID/SFD	N/A	mild	N/A	N/A
Microcephaly 8, Primary, Autosomal Recessive	614673	ID/SFD	N/A	severe	N/A	N/A
Shaheen Syndrome	615328	ID/SFD	N/A	severe	N/A	N/A
Congenital Cataracts, Facial Dysmorphism, and Neuropathy	604168	ID/SFD/NLF	N/A	mild	N/A	HPO
Muscular Dystrophy-Dystroglycanopathy (Congenital with Mental Retardation), Type B, 2	613156	ID/SFD/NLF	N/A	severe	N/A	HPO
Muscular Dystrophy-Dystroglycano-pathy (Congenital with Mental Retardation), Type B, 6	608840	ID/SFD/NLF	N/A	moderate to profound	N/A	HPO
Spastic Paraplegia 54, Autosomal Recessive	615033	ID/SFD/NLF	N/A	mild to moderate	N/A	HPO
Alacrima, Achalasia, and Mental Retardation Syndrome	615510	ID/NONE	N/A	unknown	N/A	N/A
Bardet-Biedl Syndrome 7	615984	ID/NONE	N/A	severe	N/A	N/A
Bartter Syndrome, Type 3	607364	ID/NONE	N/A	unknown	N/A	N/A
Emery-Dreifuss Muscular Dystrophy 1, X-linked	310300	ID/NONE	N/A	unknown	N/A	N/A
Feingold Syndrome 2	614326	ID/NONE	N/A	mild	N/A	N/A
Formiminotrans-ferase Deficiency	229100	ID/NONE	N/A	mild to profound	N/A	N/A
Intrinsic Factor Deficiency	261000	ID/NONE	N/A	unknown	N/A	N/A
Joubert Syndrome 15	614464	ID/NONE	N/A	mild to moderate	N/A	N/A
Joubert Syndrome 17	614615	ID/NONE	N/A	mild	N/A	N/A
Mental Retardation, Autosomal Recessive 2	607417	ID/NONE	N/A	mild	N/A	N/A
Mental Retardation, Autosomal Recessive 36	615286	ID/NONE	N/A	severe	N/A	N/A
Mental Retardation, Autosomal Recessive 43	615817	ID/NONE	N/A	moderate to severe	N/A	N/A
Mental Retardation, Truncal Obesity, Retinal Dystrophy, and Micropenis	610156	ID/NONE	N/A	moderate	N/A	N/A
Microcephaly 4, Primary, Autosomal Recessive	604321	ID/NONE	N/A	mild to moderate	N/A	N/A
Orotic Aciduria	258900	ID/NONE	N/A	mild	N/A	N/A
Renal Tubular Acidosis, Proximal, with Ocular Abnormalities and Mental Retardation	604278	ID/NONE	N/A	unknown	N/A	N/A
References for Table 5:
1. Alkuraya FS. 2010. Mental retardation, growth retardation, unusual nose, and open mouth: an autosomal recessive entity. Am J Med Genet A 152: 2160-2163.
2. Bachmann-Gagescu R, Hisama FM, Yuen AL. 2011. Myhre syndrome with ataxia and cerebellar atrophy. Clin Dysmorphol. 20: 156-159.
3. Dagli AI, Stalker HJ, Williams CA. 2008. A patient with the syndrome of megalencephaly, mega corpus callosum and complete lack of motor development. Am J Med Genet A 146: 204-207.
4. Di Donato N, Kuechler A, Vergano S, Heinritz W, Bodurtha J, Merchant SR, et al. 2016. Update on the ACTG1-associated Baraitser-Winter cerebrofrontofacial syndrome. Am J Med Genet A 170: 2644-2651.
5. Dimassi S, Labalme A, Ville D, Calender A, Mignot C, Boutry-Kryza N, et al. 2016. Whole-exome sequencing improves the diagnosis yield in sporadic infantile spasm syndrome. Clin Genet. 89: 198-204.
6. Hahn CN, del Pilar Martin M, Zhou X-Y, Mann LW, d’Azzo A. 1998. Correction of murine galactosialidosis by bone marrow-derived macrophages overexpressing human protective protein/cathepsin A under control of the colony-stimulating factor-1 receptor promoter. Proc Natl Acad Sci USA 95: 14880-14885.
7. Kölker S, Pawlak V, Ahlemeyer B, Okun JG, Hörster F, Mayatepek E, et al. 2002. NMDA receptor activation and respiratory chain complex V inhibition contribute to neurodegeneration in d-2-hydroxyglutaric aciduria. Eur J Neurosci. 16: 21-28.
8. Michaud JL, Lachance M, Hamdan FF, Carmant L, Lortie A, Diadori P, et al. 2014. The genetic landscape of infantile spasms. Hum Mol Genet. 23: 4846-4858.
9. NextProt Beta. 2017. DI-03693. Cowchock syndrome. Accessed on 6/6/17 from: http://old.nextprot.org/db/term/DI-03693
10. Poulton C, Oegema R, Heijsman D, Hoogeboom J, Schot R, Stroink H, et al. 2013. Progressive cerebellar atrophy and polyneuropathy: expanding the spectrum of PNKP mutations. Neurogenetics 14: 43-51.
11. Said E, Soler D, Sewry C. 2012. Vici syndrome—a rapidly progressive neurodegenerative disorder with hypopigmentation, immunodeficiency and myopathic changes in muscle biopsy. Am J Med Genet A 158: 440-444.
12. Sarnat HB, Flores-Sarnat L. 2015. Infantile tauopathies: hemimegalencephaly; tuberous sclerosis complex; focal cortical dysplasia 2; ganglioglioma. Brain Dev. 37: 553-562.
13. Sevrioukova IF. 2016. Structure/function relations in AIFM1 variants associated with neurodegenerative disorders. J Mol Biol. 428: 3650-3665.
14. Surendran S, Sacksteder KA, Gould SJ, Coldwell JG, Rady PL, Tyring SK, et al. 2001. Malonyl CoA decarboxylase deficiency: C to T transition in intron 2 of the MCD gene. J Neurosci Res. 65: 591-594.
15. Zweier C, Sticht H, Bijlsma EK, Clayton-Smith J, Boonen SE, Fryer A, et al. 2008. Further delineation of Pitt-Hopkins syndrome: phenotypic and genotypic description of 16 novel patients. J Med Genet. 45: 738-744.

## Sheet: Table_6
Table 6. Malformations of the hands/feet, limbs, skin, hair, and internal organs.
Condition	OMIM#	Subgroup	Hand/	Limb	Skin	Hair	Organ
			Foot	Malf.	Malf.	Malf.	Malf.
			Malf.
CHARGE Syndrome	214800	AUT/CFD	no	yes	no	no	yes
Cohen Syndrome	216550	AUT/CFD	yes	no	yes	no	yes
Glass Syndrome	612313	AUT/CFD	yes	no	yes	yes	yes
Fragile X Mental Retardation Syndrome	300624	AUT/CFD	no	no	no	no	yes
Helsmoortel-Van der AA Syndrome	615873	AUT/CFD	yes	no	no	no	yes
Kleefstra Syndrome	610253	AUT/CFD	yes	no	no	yes	yes
Lujan-Fryns Syndrome	309520	AUT/CFD	yes	no	no	no	yes
Mental Retardation with Language Impairment and with or without Autistic Features	613670	AUT/CFD	no	no	no	yes	no
Mental Retardation, Autosomal Dominant 1	156200	AUT/CFD	yes	no	no	yes	no
Mental Retardation, Autosomal Dominant 23	615761	AUT/CFD	no	no	no	yes	yes
Mental Retardation, Autosomal Dominant 24	615828	AUT/CFD	no	no	yes	no	no
Mental Retardation, Autosomal Dominant 30	616083	AUT/CFD	no	no	no	no	no
Mental Retardation, X-linked, Syndromic 14	300676	AUT/CFD	yes	no	no	no	no
Mental Retardation, X-linked, Syndromic, Wu Type	300699	AUT/CFD	no	no	no	no	no
Mowat-Wilson Syndrome	235730	AUT/CFD	no	no	no	yes	yes
Mucopoly-saccharidosis, Type IIIA	252900	AUT/CFD	no	no	no	yes	yes
Nicolaides-Baraitser Syndrome	601358	AUT/CFD	yes	no	yes	yes	yes
Phelan-McDermid Syndrome	606232	AUT/CFD	yes	no	yes	yes	no
Schaaf-Yang Syndrome	615547	AUT/CFD	yes	no	no	no	yes
Smith-Magenis Syndrome	182290	AUT/CFD	yes	no	no	no	yes
Temtamy Syndrome	218340	AUT/CFD	yes	no	no	no	no
Wiedemann-Steiner Syndrome	605130	AUT/CFD	yes	no	no	yes	no
Adenylosuccinase Deficiency	103050	AUT/CFD/NLF	no	no	no	no	no
Alpha-thalassemia/Mental Retardation Syndrome, X-linked	301040	AUT/CFD/NLF	yes	no	no	no	yes
Angelman Syndrome	105830	AUT/CFD/NLF	no	no	yes	no	no
Cardiofaciocutaneous Syndrome 1	115150	AUT/CFD/NLF	yes	no	yes	yes	yes
Cerebral Creatine Deficiency 1	300352	AUT/CFD/NLF	yes	no	no	no	yes
Cornelia de Lange Syndrome	122470	AUT/CFD/NLF	yes	yes	no	yes	yes
Lubs X-linked Mental Retardation Syndrome (MECP2 Duplication Syndrome included)	300260	AUT/CFD/NLF	no	no	no	no	yes
Marshall-Smith Syndrome	602535	AUT/CFD/NLF	yes	yes	no	yes	yes
Mental Retardation, X-linked 98	300912	AUT/CFD/NLF	no	no	no	no	no
Mental Retardation, X-linked, Syndromic, Christianson Type	300243	AUT/CFD/NLF	yes	no	no	yes	no
Myhre Syndrome	139210	AUT/CFD/NLF	yes	yes	yes	yes	yes
Pitt-Hopkins Syndrome	610954	AUT/CFD/NLF	yes	no	no	no	yes
Renpenning Syndrome 1	309500	AUT/CFD/NLF	yes	no	no	yes	yes
Smith-Lemli-Opitz Syndrome	270400	AUT/CFD/NLF	yes	yes	no	yes	yes
Tritchothiodystrophy 4, Nonphoto-sensitive	234050	AUT/CFD/NLF	no	no	yes	yes	yes
Warburg Micro Syndrome 4	615663	AUT/CFD/NLF	no	no	no	yes	yes
Cerebral Creatine Deficiency Syndrome 2	612736	AUT/NLF	no	no	no	no	no
Epileptic Encephalopathy, Early Infantile, 4	612164	AUT/NLF	no	no	no	no	no
Epileptic Encephalopathy, Early Infantile, 6	607208	AUT/NLF	no	no	no	no	no
Myotonic Dystrophy 1	160900	AUT/NLF	no	no	no	no	yes
Neurodegeneration due to Cerebral Folate Transport Deficiency	613068	AUT/NLF	no	no	no	no	no
Rett Syndrome	312750	AUT/NLF	yes	no	no	no	no
Rett Syndrome, Congenital	613454	AUT/NLF	no	no	no	no	no
Arthrogryposis, Mental Retardation, and Seizures	615553	AUT/SFD	no	no	no	no	no
Mental Retardation, Autosomal Recessive 38	615516	AUT/SFD	yes	no	no	no	no
Mental Retardation, X-linked 72	300271	AUT/SFD	no	no	no	no	no
Lowe Oculocerebral Syndrome 1	309000	AUT/SFD/NLF	no	no	yes	no	yes
Norrie Disease	310600	AUT/SFD/NLF	no	no	no	no	no
Tuberous Sclerosis 2	613254	AUT/SFD/NLF	no	no	yes	no	no
Brunner Syndrome	300615	AUT/NONE	no	no	no	no	no
Cerebral Creatine Deficiency Syndrome 3	612718	AUT/NONE	no	no	no	no	no
Epileptic Encephalopathy, Childhood Onset	615369	AUT/NONE	no	no	no	no	no
Epileptic Encephalopathy, Early Infantile, 24	615871	AUT/NONE	no	no	no	no	no
Epileptic Encephalopathy, Early Infantile, 9	300088	AUT/NONE	no	no	no	no	no
Mental Retardation, Autosomal Dominant 5	612621	AUT/NONE	no	no	no	no	no
Mental Retardation, Autosomal Recessive 3	608443	AUT/NONE	no	no	no	no	no
Muscular Dystrophy-Dystroglycanopathy (Congenital with Mental Retardation), Type B, 3 (Muscle-eye-brain disease)	613151	AUT/NONE	no	no	no	no	no
Acromelic Frontonasal Dysostosis	603671	EPI/CFD	yes	yes	yes	yes	yes
Bohring-Opitz Syndrome	605039	EPI/CFD	yes	yes	yes	no	yes
CK Syndrome	300831	EPI/CFD	yes	yes	no	no	no
Cutis Laxa, Autosomal Recessive, Type IIA	219200	EPI/CFD	no	no	yes	yes	no
Hyperphosphatasia with Mental Retardation Syndrome 4	615716	EPI/CFD	no	no	no	no	no
Hypoparathyroidism-retardation-dysmorphism Syndrome	241410	EPI/CFD	yes	no	no	no	yes
Koolen-De Vries Syndrome	610443	EPI/CFD	yes	yes	no	yes	yes
Mandibulofacial Dysostosis, Guion-Almeida Type	610536	EPI/CFD	yes	no	no	no	yes
Mental Retardation, Autosomal Recessive 41	615637	EPI/CFD	yes	no	no	no	no
Mental Retardation, X-linked 30	300558	EPI/CFD	no	no	no	no	no
Mental Retardation, X-linked, Syndromic, Snyder-Robinson Type	309583	EPI/CFD	yes	no	no	no	yes
Microcephaly, Short Stature, and Impaired Glucose Metabolism	616033	EPI/CFD	no	no	no	no	no
Psychomotor Retardation, Epilepsy, and Craniofacial Dysmorphism	614501	EPI/CFD	yes	no	no	no	yes
Seckel Syndrome 1	210600	EPI/CFD	yes	yes	yes	no	yes
Aspartylglucosaminuria	208400	EPI/CFD/NLF	no	no	no	no	yes
Band-like Calcification with Simplified Gyration and Polymicrogyria	251290	EPI/CFD/NLF	no	no	no	no	yes
Baraitser-Winter Syndrome 1	243310	EPI/CFD/NLF	yes	no	no	yes	yes
Coloboma, Congenital Heart Disease, Ichthyosiform Dermatosis, Mental Retardation, and Ear Anomalies Syndrome	280000	EPI/CFD/NLF	yes	no	yes	yes	yes
Congenital Disorder of Glycosylation, Type Ie	608799	EPI/CFD/NLF	yes	no	yes	no	yes
Congenital Disorder of Glycosylation, Type IIa	212066	EPI/CFD/NLF	yes	yes	no	yes	yes
Cutis Laxa, Autosomal Recessive, Type IIIA	219150	EPI/CFD/NLF	no	no	yes	yes	yes
Desmosterolosis	602398	EPI/CFD/NLF	no	yes	no	no	yes
Galactosialidosis	256540	EPI/CFD/NLF	no	yes	no	no	yes
Leukoencephalopathy, Cystic, without Megalencephaly	612951	EPI/CFD/NLF	no	no	no	no	no
Megalencephaly-polymicrogyria-polydactyly-hydrocephalus Syndrome 1	603387	EPI/CFD/NLF	yes	no	no	no	yes
Mental Retardation, X-linked, Syndromic, Cabezas Type	300354	EPI/CFD/NLF	yes	no	no	no	yes
Microcephaly, Progressive, with Seizures and Cerebral and Cerebellar Atrophy	615760	EPI/CFD/NLF	no	no	no	no	no
Microhydranencephaly	605013	EPI/CFD/NLF	no	no	no	no	no
Mitochondrial DNA Depletion Syndrome 13 (Encephalomyopathic Type)	615471	EPI/CFD/NLF	yes	no	no	no	yes
Multiple Congenital Anomalies-hypotonia-seizures Syndrome 2	300868	EPI/CFD/NLF	no	no	yes	no	yes
Pontocerebellar Hypoplasia, Type 10	615803	EPI/CFD/NLF	no	no	no	no	yes
Pyruvate Dehydrogenase E1-alpha Deficiency	312170	EPI/CFD/NLF	no	no	no	no	no
Spastic Paraplegia 49, Autosomal Recessive	615031	EPI/CFD/NLF	no	no	yes	no	no
Vici Syndrome	242840	EPI/CFD/NLF	no	no	yes	yes	yes
Warburg Micro Syndrome 3	614222	EPI/CFD/NLF	yes	no	no	yes	yes
Alternating Hemiplegia of Childhood 1	104290	EPI/NLF	no	no	no	no	no
Alternating Hemiplegia of Childhood 2	614820	EPI/NLF	no	no	no	no	no
Argininemia	207800	EPI/NLF	no	no	no	no	no
Ceroid Lipofuscinosis, Neuronal, 1	256730	EPI/NLF	no	no	no	no	no
Congenital Disorder of Glycosylation, Type Ic	603147	EPI/NLF	no	no	no	no	no
Cortical Dysplasia, Complex, with Other Brain Malformations 1	614039	EPI/NLF	no	no	no	no	no
Cortical Dysplasia, Complex, with Other Brain Malformations 2	615282	EPI/NLF	no	no	no	no	no
Encephalopathy, Acute, Infection-induced, Susceptibility to, 3	608033	EPI/NLF	no	no	no	no	no
Epilepsy, Progressive Myoclonic, 3, with or without Intracellular Inclusions	611726	EPI/NLF	no	no	no	no	no
Epileptic Encephalopathy, Early Infantile, 5	613477	EPI/NLF	no	no	no	no	no
Epileptic Encephalopathy, Early Infantile, 7	613720	EPI/NLF	no	no	no	no	no
Epileptic Encephalopathy, Early Infantile, 8	300607	EPI/NLF	no	no	no	no	no
GLUT1 Deficiency Syndrome 1	606777	EPI/NLF	no	no	no	no	no
Homocystinuria-megaloblastic Anemia, cb1G Complementation Type	250940	EPI/NLF	no	no	no	no	no
Hyperphosphatasia with Mental Retardation Syndrome 3	614207	EPI/NLF	no	no	no	no	no
Ichthyosis, Spastic Quadriplegia, and Mental Retardation	614457	EPI/NLF	no	no	yes	no	yes
Leukodystrophy, Hypomyelin-ating, 5	610532	EPI/NLF	no	no	no	no	no
Malonyl-CoA Decarboxylase Deficiency	248360	EPI/NLF	no	no	no	no	yes
Megaloblastic Anemia due to Dihydrofolate Reductase Deficiency	613839	EPI/NLF	no	no	no	no	yes
Microcephaly 2, Primary, Autosomal Recessive, with or without Cortical Malformations	604317	EPI/NLF	no	no	no	no	no
Microcephaly, Seizures, and Developmental Delay	613402	EPI/NLF	no	no	no	no	no
Neurodegeneration with Brain Iron Accumulation 5	300894	EPI/NLF	no	no	no	no	no
Pelizaeus-Merzbacher Disease	312080	EPI/NLF	no	no	no	no	no
Phosphoglycerate Dehydrogenase Deficiency	601815	EPI/NLF	no	no	no	no	yes
Polymicrogyria with Seizures	614833	EPI/NLF	no	no	no	no	no
Pontocerebellar Hypoplasia, Type 2D	613811	EPI/NLF	no	no	no	no	no
Pontocerebellar Hypoplasia, Type 2E	615851	EPI/NLF	no	no	no	no	no
Salt and Pepper Developmental Regression Syndrome	609056	EPI/NLF	no	no	yes	no	no
Schindler Disease, Type 1	609241	EPI/NLF	no	no	no	no	no
Spinocerebellar Ataxia, Autosomal Recessive 13	614831	EPI/NLF	no	no	no	no	no
Thiamine Metabolism Dysfunction Syndrome 2 (Biotin- or Thiamine-responsive Type)	607483	EPI/NLF	no	no	no	no	no
Epileptic Encephalopathy, Early Infantile, 18	615476	EPI/SFD	no	no	no	no	no
Microcephaly 5, Primary, Autosomal Recessive	608716	EPI/SFD	no	no	no	no	no
Congenital Disorder of Glycosylation, Type Is	300884	EPI/SFD/NLF	no	no	no	no	yes
D-2-Hydroxyglutaric Aciduria 1	600721	EPI/SFD/NLF	no	no	no	no	no
Hypermethioninemia due to Adenosine Kinase Deficiency	614300	EPI/SFD/NLF	yes	no	no	no	yes
Pyruvate Dehydrogenase E3-binding Protein Deficiency	245349	EPI/SFD/NLF	no	no	no	no	no
Spastic Paraplegia 18, Autosomal Recessive	611225	EPI/SFD/NLF	no	no	no	no	no
Spinocerebellar Ataxia, Autosomal Recessive 12	614322	EPI/SFD/NLF	no	no	no	no	no
Cortical Dysplasia, Complex, with Other Brain Malformations 5	615763	EPI/NONE	no	no	no	no	no
Epileptic Encephalopathy, Early Infantile, 19	615744	EPI/NONE	no	no	no	no	no
Epilepsy, Nocturnal Frontal Lobe, 5	615005	EPI/NONE	no	no	no	no	no
Hydrocephalus, Nonsyndromic, Autosomal Recessive 1	236600	EPI/NONE	no	no	no	no	no
Hyperlysinemia, Type I	238700	EPI/NONE	no	no	no	no	no
Hyperprolinemia, Type II	239510	EPI/NONE	no	no	no	no	no
Mental Retardation, X-linked 96	300802	EPI/NONE	no	no	no	no	no
Muscular Dystrophy-Dystroglycanopathy (Congenital with Mental Retardation), Type B, 14	615351	EPI/NONE	no	no	no	no	no
Polymicrogyria with Optic Nerve Hypoplasia	613180	EPI/NONE	no	no	no	no	no
Acrodysostosis 1 with or without Hormone Resistance	101800	ID/CFD	yes	yes	yes	no	yes
Alazami Syndrome	615071	ID/CFD	yes	no	no	no	no
Beaulieu-Boycott-Innes Syndrome	613680	ID/CFD	no	no	no	no	yes
Corpus Callosum, Agenesis of, with Mental Retardation, Ocular Coloboma, and Micrognathia	300472	ID/CFD	no	no	no	no	no
Craniofacial Dysmorphism, Skeletal Anomalies, and Mental Retardation Syndrome	213980	ID/CFD	yes	no	no	yes	yes
Desbuquois Dysplasia 2	615777	ID/CFD	yes	yes	yes	no	no
Ehlers-Danlos Syndrome, Progeroid Type, 1	130070	ID/CFD	yes	yes	yes	yes	no
Hamamy Syndrome	611174	ID/CFD	yes	no	no	yes	yes
Immunodeficiency-centromeric Instability-facial anomalies syndrome 2	614069	ID/CFD	no	no	no	no	no
Joubert Syndrome 14	614424	ID/CFD	yes	no	no	no	no
Lenz-Majewski Hyperostotic Dwarfism	151050	ID/CFD	yes	yes	yes	yes	yes
Mental Retardation, Autosomal Recessive 39	615541	ID/CFD	no	no	no	no	no
Mental Retardation, Autosomal Recessive 45	615979	ID/CFD	no	no	no	no	no
Mucolipidosis II Alpha/Beta	252500	ID/CFD	yes	yes	yes	no	yes
Noonan Syndrome 4	610733	ID/CFD	no	yes	yes	yes	yes
Noonan Syndrome 8	615355	ID/CFD	no	no	yes	yes	yes
Orofaciodigital Syndrome V	174300	ID/CFD	yes	no	no	no	yes
Otofaciocervical Syndrome 1	166780	ID/CFD	no	no	no	no	no
Otofaciocervical Syndrome 2	615560	ID/CFD	yes	no	no	no	no
Shprintzen-Goldberg Craniosyno-stosis Syndrome	182212	ID/CFD	yes	yes	yes	no	yes
Skeletal Defects, Genital Hypoplasia, and Mental Retardation	612447	ID/CFD	yes	yes	no	no	yes
Xia-Gibbs Syndrome	615829	ID/CFD	no	no	no	no	no
Cerebellar Ataxia, Mental Retardation, and Dysequilibrium Syndrome 2	610185	ID/CFD/NLF	yes	no	no	yes	no
Hurler Syndrome	607014	ID/CFD/NLF	yes	yes	yes	yes	yes
Mannosidosis, Alpha B, Lysosomal	248500	ID/CFD/NLF	no	yes	no	yes	yes
Spastic Paraplegia 50, Autosomal Recessive	612936	ID/CFD/NLF	no	no	no	no	no
Cerebellar Ataxia, Mental Retardation, and Dysequilibrium Syndrome 3	613227	ID/NLF	no	no	no	no	no
Cerebellar Ataxia, Mental Retardation, and Dysequilibrium Syndrome 4	615268	ID/NLF	no	no	no	no	no
Cowchock Syndrome	310490	ID/NLF	no	no	no	no	no
Homocystinuria-megaloblastic Anemia, cb1E Complementation Type	236270	ID/NLF	no	no	no	no	no
Lesch-Nyhan Syndrome	300322	ID/NLF	no	no	no	no	no
Mitochondrial Complex III Deficiency, Nuclear Type 4	615159	ID/NLF	no	no	no	no	no
Mental Retardation, Autosomal Recessive 1	249500	ID/NLF	no	no	no	no	no
Mental Retardation, Autosomal Recessive 40	615599	ID/NLF	yes	no	no	no	yes
Pyruvate Dehydrogenase E2 Deficiency	245348	ID/NLF	no	no	no	no	no
Spastic Paraplegia 10, Autosomal Dominant	604187	ID/NLF	no	no	no	no	no
Spastic Paraplegia 55, Autosomal Recessive	615035	ID/NLF	no	no	no	no	no
Spastic Paraplegia 64, Autosomal Recessive	615683	ID/NLF	no	no	no	no	no
Spinocerebellar Ataxia, Autosomal Recessive 14	615386	ID/NLF	no	no	no	no	no
Urocanase Deficiency	276880	ID/NLF	no	no	no	no	no
Camptodactyly, Tall Stature, and Hearing Loss Syndrome	610474	ID/SFD	yes	yes	no	no	no
Chondrodys-plasia Punctata 1, X-linked Recessive	302950	ID/SFD	yes	yes	yes	no	yes
Coloboma, Ocular, with or without Hearing Impairment, Cleft Lip/Palate, and/or Mental Retardation	120433	ID/SFD	no	no	no	no	no
Congenital Disorder of Glycosylation, Type IId	607091	ID/SFD	no	no	no	no	no
Frontonasal Dysplasia 2	613451	ID/SFD	no	no	no	yes	no
Kahrizi Syndrome	612713	ID/SFD	no	no	no	no	no
Mental Retardation, Enteropathy, Deafness, Peripheral Neuropathy, Ichthyosis, and Keratoderma	609313	ID/SFD	no	no	yes	no	no
Mental Retardation, X-linked 93	300659	ID/SFD	no	no	no	no	yes
Microcephaly 8, Primary, Autosomal Recessive	614673	ID/SFD	no	no	no	no	no
Shaheen Syndrome	615328	ID/SFD	no	no	yes	no	no
Congenital Cataracts, Facial Dysmorphism, and Neuropathy	604168	ID/SFD/NLF	no	no	no	no	yes
Muscular Dystrophy-Dystroglycanopathy (Congenital with Mental Retardation), Type B, 2	613156	ID/SFD/NLF	no	no	no	no	yes
Muscular Dystrophy-Dystroglycano-pathy (Congenital with Mental Retardation), Type B, 6	608840	ID/SFD/NLF	no	no	no	no	no
Spastic Paraplegia 54, Autosomal Recessive	615033	ID/SFD/NLF	no	no	no	no	no
Alacrima, Achalasia, and Mental Retardation Syndrome	615510	ID/NONE	no	no	yes	no	no
Bardet-Biedl Syndrome 7	615984	ID/NONE	yes	no	no	no	yes
Bartter Syndrome, Type 3	607364	ID/NONE	no	no	no	no	no
Emery-Dreifuss Muscular Dystrophy 1, X-linked	310300	ID/NONE	no	no	no	no	yes
Feingold Syndrome 2	614326	ID/NONE	yes	no	no	no	no
Formiminotrans-ferase Deficiency	229100	ID/NONE	no	no	no	no	no
Intrinsic Factor Deficiency	261000	ID/NONE	no	no	no	no	no
Joubert Syndrome 15	614464	ID/NONE	yes	no	no	no	yes
Joubert Syndrome 17	614615	ID/NONE	yes	no	no	no	no
Mental Retardation, Autosomal Recessive 2	607417	ID/NONE	no	no	no	no	no
Mental Retardation, Autosomal Recessive 36	615286	ID/NONE	no	no	no	no	no
Mental Retardation, Autosomal Recessive 43	615817	ID/NONE	no	no	no	no	no
Mental Retardation, Truncal Obesity, Retinal Dystrophy, and Micropenis	610156	ID/NONE	no	no	no	no	yes
Microcephaly 4, Primary, Autosomal Recessive	604321	ID/NONE	no	no	no	no	no
Orotic Aciduria	258900	ID/NONE	no	no	no	no	yes
Renal Tubular Acidosis, Proximal, with Ocular Abnormalities and Mental Retardation	604278	ID/NONE	no	no	no	no	no

## Sheet: Table_7
Table 7. Malformations relating to head volume and other cranial malformations, such as craniosynostoses.
Condition	OMIM#	Subgroup	Microcephaly	Macrocephaly	Other Cranial
CHARGE Syndrome	214800	AUT/CFD	yes	no	no
Cohen Syndrome	216550	AUT/CFD	yes	no	no
Glass Syndrome	612313	AUT/CFD	yes	no	yes
Fragile X Mental Retardation Syndrome	300624	AUT/CFD	no	yes	yes
Helsmoortel-Van der AA Syndrome	615873	AUT/CFD	no	no	yes
Kleefstra Syndrome	610253	AUT/CFD	yes	no	yes
Lujan-Fryns Syndrome	309520	AUT/CFD	no	yes	yes
Mental Retardation with Language Impairment and with or without Autistic Features	613670	AUT/CFD	no	no	yes
Mental Retardation, Autosomal Dominant 1	156200	AUT/CFD	yes	no	yes
Mental Retardation, Autosomal Dominant 23	615761	AUT/CFD	no	no	yes
Mental Retardation, Autosomal Dominant 24	615828	AUT/CFD	no	no	no
Mental Retardation, Autosomal Dominant 30	616083	AUT/CFD	no	no	no
Mental Retardation, X-linked, Syndromic 14	300676	AUT/CFD	no	yes	yes
Mental Retardation, X-linked, Syndromic, Wu Type	300699	AUT/CFD	no	yes	yes
Mowat-Wilson Syndrome	235730	AUT/CFD	yes	no	no
Mucopoly-saccharidosis, Type IIIA	252900	AUT/CFD	no	no	no
Nicolaides-Baraitser Syndrome	601358	AUT/CFD	yes	no	no
Phelan-McDermid Syndrome	606232	AUT/CFD	no	yes	yes
Schaaf-Yang Syndrome	615547	AUT/CFD	no	no	no
Smith-Magenis Syndrome	182290	AUT/CFD	no	no	yes
Temtamy Syndrome	218340	AUT/CFD	no	no	yes
Wiedemann-Steiner Syndrome	605130	AUT/CFD	no	no	no
Adenylosuccinase Deficiency	103050	AUT/CFD/NLF	yes	no	yes
Alpha-thalassemia/Mental Retardation Syndrome, X-linked	301040	AUT/CFD/NLF	yes	no	no
Angelman Syndrome	105830	AUT/CFD/NLF	yes	no	yes
Cardiofaciocutaneous Syndrome 1	115150	AUT/CFD/NLF	no	yes	yes
Cerebral Creatine Deficiency 1	300352	AUT/CFD/NLF	yes	no	yes
Cornelia de Lange Syndrome	122470	AUT/CFD/NLF	yes	no	yes
Lubs X-linked Mental Retardation Syndrome (MECP2 Duplication Syndrome included)	300260	AUT/CFD/NLF	yes	yes	yes
Marshall-Smith Syndrome	602535	AUT/CFD/NLF	no	no	yes
Mental Retardation, X-linked 98	300912	AUT/CFD/NLF	yes	no	no
Mental Retardation, X-linked, Syndromic, Christianson Type	300243	AUT/CFD/NLF	yes	no	no
Myhre Syndrome	139210	AUT/CFD/NLF	yes	no	no
Pitt-Hopkins Syndrome	610954	AUT/CFD/NLF	yes	no	no
Renpenning Syndrome 1	309500	AUT/CFD/NLF	yes	no	yes
Smith-Lemli-Opitz Syndrome	270400	AUT/CFD/NLF	yes	no	yes
Tritchothiodystrophy 4, Nonphoto-sensitive	234050	AUT/CFD/NLF	yes	no	no
Warburg Micro Syndrome 4	615663	AUT/CFD/NLF	yes	no	yes
Cerebral Creatine Deficiency Syndrome 2	612736	AUT/NLF	no	no	no
Epileptic Encephalopathy, Early Infantile, 4	612164	AUT/NLF	no	no	no
Epileptic Encephalopathy, Early Infantile, 6	607208	AUT/NLF	yes	no	no
Myotonic Dystrophy 1	160900	AUT/NLF	no	no	yes
Neurodegeneration due to Cerebral Folate Transport Deficiency	613068	AUT/NLF	no	no	no
Rett Syndrome	312750	AUT/NLF	yes	no	no
Rett Syndrome, Congenital	613454	AUT/NLF	yes	no	no
Arthrogryposis, Mental Retardation, and Seizures	615553	AUT/SFD	yes	no	no
Mental Retardation, Autosomal Recessive 38	615516	AUT/SFD	no	no	yes
Mental Retardation, X-linked 72	300271	AUT/SFD	no	yes	yes
Lowe Oculocerebral Syndrome 1	309000	AUT/SFD/NLF	no	no	no
Norrie Disease	310600	AUT/SFD/NLF	no	no	no
Tuberous Sclerosis 2	613254	AUT/SFD/NLF	no	no	no
Brunner Syndrome	300615	AUT/NONE	no	no	no
Cerebral Creatine Deficiency Syndrome 3	612718	AUT/NONE	no	no	no
Epileptic Encephalopathy, Childhood Onset	615369	AUT/NONE	no	no	no
Epileptic Encephalopathy, Early Infantile, 24	615871	AUT/NONE	no	no	no
Epileptic Encephalopathy, Early Infantile, 9	300088	AUT/NONE	no	no	no
Mental Retardation, Autosomal Dominant 5	612621	AUT/NONE	yes	no	no
Mental Retardation, Autosomal Recessive 3	608443	AUT/NONE	no	no	no
Muscular Dystrophy-Dystroglycanopathy (Congenital with Mental Retardation), Type B, 3 (Muscle-eye-brain disease)	613151	AUT/NONE	yes	no	no
Acromelic Frontonasal Dysostosis	603671	EPI/CFD	no	no	yes
Bohring-Opitz Syndrome	605039	EPI/CFD	yes	no	yes
CK Syndrome	300831	EPI/CFD	yes	no	no
Cutis Laxa, Autosomal Recessive, Type IIA	219200	EPI/CFD	yes	no	no
Hyperphosphatasia with Mental Retardation Syndrome 4	615716	EPI/CFD	yes	no	no
Hypoparathyroidism-retardation-dysmorphism Syndrome	241410	EPI/CFD	yes	no	no
Koolen-De Vries Syndrome	610443	EPI/CFD	no	no	yes
Mandibulofacial Dysostosis, Guion-Almeida Type	610536	EPI/CFD	yes	no	yes
Mental Retardation, Autosomal Recessive 41	615637	EPI/CFD	no	yes	yes
Mental Retardation, X-linked 30	300558	EPI/CFD	yes	no	yes
Mental Retardation, X-linked, Syndromic, Snyder-Robinson Type	309583	EPI/CFD	no	no	no
Microcephaly, Short Stature, and Impaired Glucose Metabolism	616033	EPI/CFD	yes	no	no
Psychomotor Retardation, Epilepsy, and Craniofacial Dysmorphism	614501	EPI/CFD	no	no	yes
Seckel Syndrome 1	210600	EPI/CFD	yes	no	yes
Aspartylglucosaminuria	208400	EPI/CFD/NLF	yes	no	yes
Band-like Calcification with Simplified Gyration and Polymicrogyria	251290	EPI/CFD/NLF	yes	no	yes
Baraitser-Winter Syndrome 1	243310	EPI/CFD/NLF	yes	no	yes
Coloboma, Congenital Heart Disease, Ichthyosiform Dermatosis, Mental Retardation, and Ear Anomalies Syndrome	280000	EPI/CFD/NLF	no	no	yes
Congenital Disorder of Glycosylation, Type Ie	608799	EPI/CFD/NLF	yes	no	yes
Congenital Disorder of Glycosylation, Type IIa	212066	EPI/CFD/NLF	yes	yes	yes
Cutis Laxa, Autosomal Recessive, Type IIIA	219150	EPI/CFD/NLF	no	no	yes
Desmosterolosis	602398	EPI/CFD/NLF	yes	yes	yes
Galactosialidosis	256540	EPI/CFD/NLF	no	no	no
Leukoencephalopathy, Cystic, without Megalencephaly	612951	EPI/CFD/NLF	yes	no	no
Megalencephaly-polymicrogyria-polydactyly-hydrocephalus Syndrome 1	603387	EPI/CFD/NLF	no	yes	yes
Mental Retardation, X-linked, Syndromic, Cabezas Type	300354	EPI/CFD/NLF	no	yes	yes
Microcephaly, Progressive, with Seizures and Cerebral and Cerebellar Atrophy	615760	EPI/CFD/NLF	yes	no	yes
Microhydranencephaly	605013	EPI/CFD/NLF	yes	no	yes
Mitochondrial DNA Depletion Syndrome 13 (Encephalomyopathic Type)	615471	EPI/CFD/NLF	yes	no	yes
Multiple Congenital Anomalies-hypotonia-seizures Syndrome 2	300868	EPI/CFD/NLF	yes	yes	no
Pontocerebellar Hypoplasia, Type 10	615803	EPI/CFD/NLF	yes	no	no
Pyruvate Dehydrogenase E1-alpha Deficiency	312170	EPI/CFD/NLF	yes	no	yes
Spastic Paraplegia 49, Autosomal Recessive	615031	EPI/CFD/NLF	yes	no	yes
Vici Syndrome	242840	EPI/CFD/NLF	yes	no	no
Warburg Micro Syndrome 3	614222	EPI/CFD/NLF	yes	no	yes
Alternating Hemiplegia of Childhood 1	104290	EPI/NLF	no	no	no
Alternating Hemiplegia of Childhood 2	614820	EPI/NLF	no	no	no
Argininemia	207800	EPI/NLF	no	no	no
Ceroid Lipofuscinosis, Neuronal, 1	256730	EPI/NLF	yes	no	no
Congenital Disorder of Glycosylation, Type Ic	603147	EPI/NLF	no	no	no
Cortical Dysplasia, Complex, with Other Brain Malformations 1	614039	EPI/NLF	yes	no	no
Cortical Dysplasia, Complex, with Other Brain Malformations 2	615282	EPI/NLF	yes	no	no
Encephalopathy, Acute, Infection-induced, Susceptibility to, 3	608033	EPI/NLF	no	no	no
Epilepsy, Progressive Myoclonic, 3, with or without Intracellular Inclusions	611726	EPI/NLF	yes	no	no
Epileptic Encephalopathy, Early Infantile, 5	613477	EPI/NLF	yes	no	no
Epileptic Encephalopathy, Early Infantile, 7	613720	EPI/NLF	no	no	no
Epileptic Encephalopathy, Early Infantile, 8	300607	EPI/NLF	no	no	no
GLUT1 Deficiency Syndrome 1	606777	EPI/NLF	yes	no	no
Homocystinuria-megaloblastic Anemia, cb1G Complementation Type	250940	EPI/NLF	no	no	no
Hyperphosphatasia with Mental Retardation Syndrome 3	614207	EPI/NLF	yes	no	no
Ichthyosis, Spastic Quadriplegia, and Mental Retardation	614457	EPI/NLF	yes	no	no
Leukodystrophy, Hypomyelin-ating, 5	610532	EPI/NLF	no	no	no
Malonyl-CoA Decarboxylase Deficiency	248360	EPI/NLF	no	no	no
Megaloblastic Anemia due to Dihydrofolate Reductase Deficiency	613839	EPI/NLF	yes	no	no
Microcephaly 2, Primary, Autosomal Recessive, with or without Cortical Malformations	604317	EPI/NLF	yes	no	yes
Microcephaly, Seizures, and Developmental Delay	613402	EPI/NLF	yes	no	no
Neurodegeneration with Brain Iron Accumulation 5	300894	EPI/NLF	no	no	no
Pelizaeus-Merzbacher Disease	312080	EPI/NLF	yes	no	no
Phosphoglycerate Dehydrogenase Deficiency	601815	EPI/NLF	yes	no	no
Polymicrogyria with Seizures	614833	EPI/NLF	yes	no	no
Pontocerebellar Hypoplasia, Type 2D	613811	EPI/NLF	yes	no	no
Pontocerebellar Hypoplasia, Type 2E	615851	EPI/NLF	yes	no	no
Salt and Pepper Developmental Regression Syndrome	609056	EPI/NLF	yes	no	no
Schindler Disease, Type 1	609241	EPI/NLF	no	no	no
Spinocerebellar Ataxia, Autosomal Recessive 13	614831	EPI/NLF	no	no	no
Thiamine Metabolism Dysfunction Syndrome 2 (Biotin- or Thiamine-responsive Type)	607483	EPI/NLF	no	no	no
Epileptic Encephalopathy, Early Infantile, 18	615476	EPI/SFD	no	no	yes
Microcephaly 5, Primary, Autosomal Recessive	608716	EPI/SFD	yes	no	yes
Congenital Disorder of Glycosylation, Type Is	300884	EPI/SFD/NLF	yes	no	no
D-2-Hydroxyglutaric Aciduria 1	600721	EPI/SFD/NLF	no	yes	yes
Hypermethioninemia due to Adenosine Kinase Deficiency	614300	EPI/SFD/NLF	no	yes	yes
Pyruvate Dehydrogenase E3-binding Protein Deficiency	245349	EPI/SFD/NLF	yes	no	yes
Spastic Paraplegia 18, Autosomal Recessive	611225	EPI/SFD/NLF	no	no	no
Spinocerebellar Ataxia, Autosomal Recessive 12	614322	EPI/SFD/NLF	no	no	no
Cortical Dysplasia, Complex, with Other Brain Malformations 5	615763	EPI/NONE	no	no	no
Epileptic Encephalopathy, Early Infantile, 19	615744	EPI/NONE	no	no	no
Epilepsy, Nocturnal Frontal Lobe, 5	615005	EPI/NONE	no	no	no
Hydrocephalus, Nonsyndromic, Autosomal Recessive 1	236600	EPI/NONE	no	no	no
Hyperlysinemia, Type I	238700	EPI/NONE	no	no	no
Hyperprolinemia, Type II	239510	EPI/NONE	no	no	no
Mental Retardation, X-linked 96	300802	EPI/NONE	no	no	no
Muscular Dystrophy-Dystroglycanopathy (Congenital with Mental Retardation), Type B, 14	615351	EPI/NONE	yes	no	no
Polymicrogyria with Optic Nerve Hypoplasia	613180	EPI/NONE	yes	no	no
Acrodysostosis 1 with or without Hormone Resistance	101800	ID/CFD	no	no	yes
Alazami Syndrome	615071	ID/CFD	yes	no	no
Beaulieu-Boycott-Innes Syndrome	613680	ID/CFD	yes	no	yes
Corpus Callosum, Agenesis of, with Mental Retardation, Ocular Coloboma, and Micrognathia	300472	ID/CFD	no	yes	yes
Craniofacial Dysmorphism, Skeletal Anomalies, and Mental Retardation Syndrome	213980	ID/CFD	yes	yes	yes
Desbuquois Dysplasia 2	615777	ID/CFD	no	yes	no
Ehlers-Danlos Syndrome, Progeroid Type, 1	130070	ID/CFD	no	yes	yes
Hamamy Syndrome	611174	ID/CFD	no	no	yes
Immunodeficiency-centromeric Instability-facial anomalies syndrome 2	614069	ID/CFD	no	no	no
Joubert Syndrome 14	614424	ID/CFD	no	no	yes
Lenz-Majewski Hyperostotic Dwarfism	151050	ID/CFD	yes	yes	yes
Mental Retardation, Autosomal Recessive 39	615541	ID/CFD	yes	no	yes
Mental Retardation, Autosomal Recessive 45	615979	ID/CFD	no	no	yes
Mucolipidosis II Alpha/Beta	252500	ID/CFD	no	no	yes
Noonan Syndrome 4	610733	ID/CFD	no	yes	no
Noonan Syndrome 8	615355	ID/CFD	no	yes	no
Orofaciodigital Syndrome V	174300	ID/CFD	no	no	yes
Otofaciocervical Syndrome 1	166780	ID/CFD	no	no	no
Otofaciocervical Syndrome 2	615560	ID/CFD	no	no	no
Shprintzen-Goldberg Craniosyno-stosis Syndrome	182212	ID/CFD	yes	no	yes
Skeletal Defects, Genital Hypoplasia, and Mental Retardation	612447	ID/CFD	yes	no	no
Xia-Gibbs Syndrome	615829	ID/CFD	no	no	no
Cerebellar Ataxia, Mental Retardation, and Dysequilibrium Syndrome 2	610185	ID/CFD/NLF	no	no	no
Hurler Syndrome	607014	ID/CFD/NLF	no	yes	yes
Mannosidosis, Alpha B, Lysosomal	248500	ID/CFD/NLF	no	yes	yes
Spastic Paraplegia 50, Autosomal Recessive	612936	ID/CFD/NLF	yes	no	yes
Cerebellar Ataxia, Mental Retardation, and Dysequilibrium Syndrome 3	613227	ID/NLF	no	no	no
Cerebellar Ataxia, Mental Retardation, and Dysequilibrium Syndrome 4	615268	ID/NLF	no	no	no
Cowchock Syndrome	310490	ID/NLF	no	no	no
Homocystinuria-megaloblastic Anemia, cb1E Complementation Type	236270	ID/NLF	no	no	no
Lesch-Nyhan Syndrome	300322	ID/NLF	no	no	no
Mitochondrial Complex III Deficiency, Nuclear Type 4	615159	ID/NLF	no	no	no
Mental Retardation, Autosomal Recessive 1	249500	ID/NLF	no	no	no
Mental Retardation, Autosomal Recessive 40	615599	ID/NLF	yes	no	no
Pyruvate Dehydrogenase E2 Deficiency	245348	ID/NLF	yes	no	no
Spastic Paraplegia 10, Autosomal Dominant	604187	ID/NLF	no	no	no
Spastic Paraplegia 55, Autosomal Recessive	615035	ID/NLF	no	no	no
Spastic Paraplegia 64, Autosomal Recessive	615683	ID/NLF	yes	no	no
Spinocerebellar Ataxia, Autosomal Recessive 14	615386	ID/NLF	no	no	no
Urocanase Deficiency	276880	ID/NLF	no	no	no
Camptodactyly, Tall Stature, and Hearing Loss Syndrome	610474	ID/SFD	yes	no	no
Chondrodys-plasia Punctata 1, X-linked Recessive	302950	ID/SFD	yes	no	no
Coloboma, Ocular, with or without Hearing Impairment, Cleft Lip/Palate, and/or Mental Retardation	120433	ID/SFD	no	no	no
Congenital Disorder of Glycosylation, Type IId	607091	ID/SFD	no	no	no
Frontonasal Dysplasia 2	613451	ID/SFD	yes	no	yes
Kahrizi Syndrome	612713	ID/SFD	no	no	no
Mental Retardation, Enteropathy, Deafness, Peripheral Neuropathy, Ichthyosis, and Keratoderma	609313	ID/SFD	no	no	yes
Mental Retardation, X-linked 93	300659	ID/SFD	no	yes	yes
Microcephaly 8, Primary, Autosomal Recessive	614673	ID/SFD	yes	no	yes
Shaheen Syndrome	615328	ID/SFD	yes	no	no
Congenital Cataracts, Facial Dysmorphism, and Neuropathy	604168	ID/SFD/NLF	no	no	no
Muscular Dystrophy-Dystroglycanopathy (Congenital with Mental Retardation), Type B, 2	613156	ID/SFD/NLF	yes	no	no
Muscular Dystrophy-Dystroglycano-pathy (Congenital with Mental Retardation), Type B, 6	608840	ID/SFD/NLF	no	no	no
Spastic Paraplegia 54, Autosomal Recessive	615033	ID/SFD/NLF	no	no	no
Alacrima, Achalasia, and Mental Retardation Syndrome	615510	ID/NONE	no	no	no
Bardet-Biedl Syndrome 7	615984	ID/NONE	no	no	no
Bartter Syndrome, Type 3	607364	ID/NONE	no	no	no
Emery-Dreifuss Muscular Dystrophy 1, X-linked	310300	ID/NONE	no	no	no
Feingold Syndrome 2	614326	ID/NONE	yes	no	no
Formiminotrans-ferase Deficiency	229100	ID/NONE	no	no	no
Intrinsic Factor Deficiency	261000	ID/NONE	no	no	no
Joubert Syndrome 15	614464	ID/NONE	no	no	no
Joubert Syndrome 17	614615	ID/NONE	no	no	no
Mental Retardation, Autosomal Recessive 2	607417	ID/NONE	no	no	no
Mental Retardation, Autosomal Recessive 36	615286	ID/NONE	yes	no	no
Mental Retardation, Autosomal Recessive 43	615817	ID/NONE	no	no	no
Mental Retardation, Truncal Obesity, Retinal Dystrophy, and Micropenis	610156	ID/NONE	no	no	no
Microcephaly 4, Primary, Autosomal Recessive	604321	ID/NONE	yes	no	no
Orotic Aciduria	258900	ID/NONE	no	no	no
Renal Tubular Acidosis, Proximal, with Ocular Abnormalities and Mental Retardation	604278	ID/NONE	no	no	no

## Sheet: Table_8
Table 8. Malformations of the brain, corpus callosum, and cortical tissues.
Condition	OMIM#	Subgroup	Brain Malf.	ACC	MCD	Neocort	Cerebellum
CHARGE Syndrome	214800	AUT/CFD	no	no	no	no	no
Cohen Syndrome	216550	AUT/CFD	yes	no	yes	no	yes
Glass Syndrome	612313	AUT/CFD	no	no	no	no	no
Fragile X Mental Retardation Syndrome	300624	AUT/CFD	yes	no	yes	yes	no
Helsmoortel-Van der AA Syndrome	615873	AUT/CFD	no	no	no	no	no
Kleefstra Syndrome	610253	AUT/CFD	no	no	no	no	no
Lujan-Fryns Syndrome	309520	AUT/CFD	yes	yes	no	no	no
Mental Retardation with Language Impairment and with or without Autistic Features	613670	AUT/CFD	no	no	no	no	no
Mental Retardation, Autosomal Dominant 1	156200	AUT/CFD	no	no	no	no	no
Mental Retardation, Autosomal Dominant 23	615761	AUT/CFD	no	no	no	no	no
Mental Retardation, Autosomal Dominant 24	615828	AUT/CFD	no	no	no	no	no
Mental Retardation, Autosomal Dominant 30	616083	AUT/CFD	no	no	no	no	no
Mental Retardation, X-linked, Syndromic 14	300676	AUT/CFD	no	no	no	no	no
Mental Retardation, X-linked, Syndromic, Wu Type	300699	AUT/CFD	no	no	no	no	no
Mowat-Wilson Syndrome	235730	AUT/CFD	yes	yes	no	no	no
Mucopoly-saccharidosis, Type IIIA	252900	AUT/CFD	no	no	no	no	no
Nicolaides-Baraitser Syndrome	601358	AUT/CFD	no	no	no	no	no
Phelan-McDermid Syndrome	606232	AUT/CFD	no	no	no	no	no
Schaaf-Yang Syndrome	615547	AUT/CFD	no	no	no	no	no
Smith-Magenis Syndrome	182290	AUT/CFD	yes	no	yes	no	yes
Temtamy Syndrome	218340	AUT/CFD	yes	yes	no	no	no
Wiedemann-Steiner Syndrome	605130	AUT/CFD	no	no	no	no	no
Adenylosuccinase Deficiency	103050	AUT/CFD/NLF	no	no	no	no	no
Alpha-thalassemia/Mental Retardation Syndrome, X-linked	301040	AUT/CFD/NLF	no	no	no	no	no
Angelman Syndrome	105830	AUT/CFD/NLF	no	no	no	no	no
Cardiofaciocutaneous Syndrome 1	115150	AUT/CFD/NLF	yes	yes	yes	yes	no
Cerebral Creatine Deficiency 1	300352	AUT/CFD/NLF	yes	no	no	no	no
Cornelia de Lange Syndrome	122470	AUT/CFD/NLF	no	no	no	no	no
Lubs X-linked Mental Retardation Syndrome (MECP2 Duplication Syndrome included)	300260	AUT/CFD/NLF	no	no	no	no	no
Marshall-Smith Syndrome	602535	AUT/CFD/NLF	yes	yes	yes	yes	no
Mental Retardation, X-linked 98	300912	AUT/CFD/NLF	no	no	no	no	no
Mental Retardation, X-linked, Syndromic, Christianson Type	300243	AUT/CFD/NLF	no	no	no	no	no
Myhre Syndrome	139210	AUT/CFD/NLF	no	no	no	no	no
Pitt-Hopkins Syndrome	610954	AUT/CFD/NLF	yes	yes	no	no	no
Renpenning Syndrome 1	309500	AUT/CFD/NLF	no	no	no	no	no
Smith-Lemli-Opitz Syndrome	270400	AUT/CFD/NLF	yes	no	yes	yes	no
Tritchothiodystrophy 4, Nonphoto-sensitive	234050	AUT/CFD/NLF	yes	yes	no	no	no
Warburg Micro Syndrome 4	615663	AUT/CFD/NLF	yes	no	yes	yes	no
Cerebral Creatine Deficiency Syndrome 2	612736	AUT/NLF	no	no	no	no	no
Epileptic Encephalopathy, Early Infantile, 4	612164	AUT/NLF	yes	no	no	no	no
Epileptic Encephalopathy, Early Infantile, 6	607208	AUT/NLF	no	no	no	no	no
Myotonic Dystrophy 1	160900	AUT/NLF	no	no	no	no	no
Neurodegeneration due to Cerebral Folate Transport Deficiency	613068	AUT/NLF	no	no	no	no	no
Rett Syndrome	312750	AUT/NLF	no	no	no	no	no
Rett Syndrome, Congenital	613454	AUT/NLF	yes	no	yes	yes	no
Arthrogryposis, Mental Retardation, and Seizures	615553	AUT/SFD	no	no	no	no	no
Mental Retardation, Autosomal Recessive 38	615516	AUT/SFD	yes	no	no	no	no
Mental Retardation, X-linked 72	300271	AUT/SFD	no	no	no	no	no
Lowe Oculocerebral Syndrome 1	309000	AUT/SFD/NLF	no	no	no	no	no
Norrie Disease	310600	AUT/SFD/NLF	no	no	no	no	no
Tuberous Sclerosis 2	613254	AUT/SFD/NLF	yes	no	yes	yes	no
Brunner Syndrome	300615	AUT/NONE	no	no	no	no	no
Cerebral Creatine Deficiency Syndrome 3	612718	AUT/NONE	no	no	no	no	no
Epileptic Encephalopathy, Childhood Onset	615369	AUT/NONE	no	no	no	no	no
Epileptic Encephalopathy, Early Infantile, 24	615871	AUT/NONE	no	no	no	no	no
Epileptic Encephalopathy, Early Infantile, 9	300088	AUT/NONE	no	no	no	no	no
Mental Retardation, Autosomal Dominant 5	612621	AUT/NONE	no	no	no	no	no
Mental Retardation, Autosomal Recessive 3	608443	AUT/NONE	no	no	no	no	no
Muscular Dystrophy-Dystroglycanopathy (Congenital with Mental Retardation), Type B, 3 (Muscle-eye-brain disease)	613151	AUT/NONE	yes	no	yes	no	yes
Acromelic Frontonasal Dysostosis	603671	EPI/CFD	yes	yes	yes	yes	no
Bohring-Opitz Syndrome	605039	EPI/CFD	yes	yes	yes	yes	no
CK Syndrome	300831	EPI/CFD	yes	no	yes	yes	no
Cutis Laxa, Autosomal Recessive, Type IIA	219200	EPI/CFD	yes	no	yes	yes	no
Hyperphosphatasia with Mental Retardation Syndrome 4	615716	EPI/CFD	no	no	no	no	no
Hypoparathyroidism-retardation-dysmorphism Syndrome	241410	EPI/CFD	no	no	no	no	no
Koolen-De Vries Syndrome	610443	EPI/CFD	no	no	no	no	no
Mandibulofacial Dysostosis, Guion-Almeida Type	610536	EPI/CFD	no	no	no	no	no
Mental Retardation, Autosomal Recessive 41	615637	EPI/CFD	no	no	no	no	no
Mental Retardation, X-linked 30	300558	EPI/CFD	no	no	no	no	no
Mental Retardation, X-linked, Syndromic, Snyder-Robinson Type	309583	EPI/CFD	no	no	no	no	no
Microcephaly, Short Stature, and Impaired Glucose Metabolism	616033	EPI/CFD	no	no	no	no	no
Psychomotor Retardation, Epilepsy, and Craniofacial Dysmorphism	614501	EPI/CFD	yes	no	yes	yes	no
Seckel Syndrome 1	210600	EPI/CFD	yes	no	yes	yes	yes
Aspartylglucosaminuria	208400	EPI/CFD/NLF	no	no	no	no	no
Band-like Calcification with Simplified Gyration and Polymicrogyria	251290	EPI/CFD/NLF	yes	no	yes	yes	yes
Baraitser-Winter Syndrome 1	243310	EPI/CFD/NLF	yes	yes	yes	yes	no
Coloboma, Congenital Heart Disease, Ichthyosiform Dermatosis, Mental Retardation, and Ear Anomalies Syndrome	280000	EPI/CFD/NLF	no	no	no	no	no
Congenital Disorder of Glycosylation, Type Ie	608799	EPI/CFD/NLF	no	no	no	no	no
Congenital Disorder of Glycosylation, Type IIa	212066	EPI/CFD/NLF	no	no	no	no	no
Cutis Laxa, Autosomal Recessive, Type IIIA	219150	EPI/CFD/NLF	no	no	no	no	no
Desmosterolosis	602398	EPI/CFD/NLF	yes	yes	yes	yes	no
Galactosialidosis	256540	EPI/CFD/NLF	no	no	no	no	no
Leukoencephalopathy, Cystic, without Megalencephaly	612951	EPI/CFD/NLF	no	no	no	no	no
Megalencephaly-polymicrogyria-polydactyly-hydrocephalus Syndrome 1	603387	EPI/CFD/NLF	yes	no	yes	yes	no
Mental Retardation, X-linked, Syndromic, Cabezas Type	300354	EPI/CFD/NLF	yes	no	yes	yes	no
Microcephaly, Progressive, with Seizures and Cerebral and Cerebellar Atrophy	615760	EPI/CFD/NLF	yes	no	yes	yes	no
Microhydranencephaly	605013	EPI/CFD/NLF	yes	yes	yes	yes	yes
Mitochondrial DNA Depletion Syndrome 13 (Encephalomyopathic Type)	615471	EPI/CFD/NLF	yes	no	no	no	no
Multiple Congenital Anomalies-hypotonia-seizures Syndrome 2	300868	EPI/CFD/NLF	yes	no	yes	yes	yes
Pontocerebellar Hypoplasia, Type 10	615803	EPI/CFD/NLF	yes	no	yes	yes	yes
Pyruvate Dehydrogenase E1-alpha Deficiency	312170	EPI/CFD/NLF	yes	yes	yes	no	no
Spastic Paraplegia 49, Autosomal Recessive	615031	EPI/CFD/NLF	yes	no	no	no	no
Vici Syndrome	242840	EPI/CFD/NLF	yes	yes	yes	yes	yes
Warburg Micro Syndrome 3	614222	EPI/CFD/NLF	yes	no	yes	yes	no
Alternating Hemiplegia of Childhood 1	104290	EPI/NLF	no	no	no	no	no
Alternating Hemiplegia of Childhood 2	614820	EPI/NLF	no	no	no	no	no
Argininemia	207800	EPI/NLF	no	no	no	no	no
Ceroid Lipofuscinosis, Neuronal, 1	256730	EPI/NLF	no	no	no	no	no
Congenital Disorder of Glycosylation, Type Ic	603147	EPI/NLF	no	no	no	no	no
Cortical Dysplasia, Complex, with Other Brain Malformations 1	614039	EPI/NLF	yes	yes	yes	yes	yes
Cortical Dysplasia, Complex, with Other Brain Malformations 2	615282	EPI/NLF	yes	no	yes	yes	yes
Encephalopathy, Acute, Infection-induced, Susceptibility to, 3	608033	EPI/NLF	no	no	no	no	no
Epilepsy, Progressive Myoclonic, 3, with or without Intracellular Inclusions	611726	EPI/NLF	yes	no	no	no	no
Epileptic Encephalopathy, Early Infantile, 5	613477	EPI/NLF	yes	no	no	no	no
Epileptic Encephalopathy, Early Infantile, 7	613720	EPI/NLF	yes	no	no	no	no
Epileptic Encephalopathy, Early Infantile, 8	300607	EPI/NLF	no	no	no	no	no
GLUT1 Deficiency Syndrome 1	606777	EPI/NLF	no	no	no	no	no
Homocystinuria-megaloblastic Anemia, cb1G Complementation Type	250940	EPI/NLF	no	no	no	no	no
Hyperphosphatasia with Mental Retardation Syndrome 3	614207	EPI/NLF	no	no	no	no	no
Ichthyosis, Spastic Quadriplegia, and Mental Retardation	614457	EPI/NLF	no	no	no	no	no
Leukodystrophy, Hypomyelin-ating, 5	610532	EPI/NLF	no	no	no	no	no
Malonyl-CoA Decarboxylase Deficiency	248360	EPI/NLF	yes	no	yes	yes	no
Megaloblastic Anemia due to Dihydrofolate Reductase Deficiency	613839	EPI/NLF	yes	no	yes	no	yes
Microcephaly 2, Primary, Autosomal Recessive, with or without Cortical Malformations	604317	EPI/NLF	yes	no	yes	yes	no
Microcephaly, Seizures, and Developmental Delay	613402	EPI/NLF	yes	no	yes	yes	no
Neurodegeneration with Brain Iron Accumulation 5	300894	EPI/NLF	no	no	no	no	no
Pelizaeus-Merzbacher Disease	312080	EPI/NLF	yes	no	no	no	no
Phosphoglycerate Dehydrogenase Deficiency	601815	EPI/NLF	yes	no	no	no	no
Polymicrogyria with Seizures	614833	EPI/NLF	yes	no	yes	yes	no
Pontocerebellar Hypoplasia, Type 2D	613811	EPI/NLF	yes	no	no	no	no
Pontocerebellar Hypoplasia, Type 2E	615851	EPI/NLF	yes	no	no	no	no
Salt and Pepper Developmental Regression Syndrome	609056	EPI/NLF	no	no	no	no	no
Schindler Disease, Type 1	609241	EPI/NLF	no	no	no	no	no
Spinocerebellar Ataxia, Autosomal Recessive 13	614831	EPI/NLF	yes	no	yes	no	yes
Thiamine Metabolism Dysfunction Syndrome 2 (Biotin- or Thiamine-responsive Type)	607483	EPI/NLF	no	no	no	no	no
Epileptic Encephalopathy, Early Infantile, 18	615476	EPI/SFD	yes	no	no	no	no
Microcephaly 5, Primary, Autosomal Recessive	608716	EPI/SFD	yes	no	yes	yes	yes
Congenital Disorder of Glycosylation, Type Is	300884	EPI/SFD/NLF	yes	no	no	no	no
D-2-Hydroxyglutaric Aciduria 1	600721	EPI/SFD/NLF	yes	no	yes	yes	no
Hypermethioninemia due to Adenosine Kinase Deficiency	614300	EPI/SFD/NLF	no	no	no	no	no
Pyruvate Dehydrogenase E3-binding Protein Deficiency	245349	EPI/SFD/NLF	yes	yes	no	no	no
Spastic Paraplegia 18, Autosomal Recessive	611225	EPI/SFD/NLF	no	no	no	no	no
Spinocerebellar Ataxia, Autosomal Recessive 12	614322	EPI/SFD/NLF	no	no	no	no	no
Cortical Dysplasia, Complex, with Other Brain Malformations 5	615763	EPI/NONE	yes	no	yes	yes	no
Epileptic Encephalopathy, Early Infantile, 19	615744	EPI/NONE	no	no	no	no	no
Epilepsy, Nocturnal Frontal Lobe, 5	615005	EPI/NONE	no	no	no	no	no
Hydrocephalus, Nonsyndromic, Autosomal Recessive 1	236600	EPI/NONE	no	no	no	no	no
Hyperlysinemia, Type I	238700	EPI/NONE	no	no	no	no	no
Hyperprolinemia, Type II	239510	EPI/NONE	no	no	no	no	no
Mental Retardation, X-linked 96	300802	EPI/NONE	no	no	no	no	no
Muscular Dystrophy-Dystroglycanopathy (Congenital with Mental Retardation), Type B, 14	615351	EPI/NONE	yes	no	yes	no	yes
Polymicrogyria with Optic Nerve Hypoplasia	613180	EPI/NONE	yes	yes	yes	yes	no
Acrodysostosis 1 with or without Hormone Resistance	101800	ID/CFD	no	no	no	no	no
Alazami Syndrome	615071	ID/CFD	no	no	no	no	no
Beaulieu-Boycott-Innes Syndrome	613680	ID/CFD	no	no	no	no	no
Corpus Callosum, Agenesis of, with Mental Retardation, Ocular Coloboma, and Micrognathia	300472	ID/CFD	yes	yes	no	no	no
Craniofacial Dysmorphism, Skeletal Anomalies, and Mental Retardation Syndrome	213980	ID/CFD	yes	no	no	no	no
Desbuquois Dysplasia 2	615777	ID/CFD	no	no	no	no	no
Ehlers-Danlos Syndrome, Progeroid Type, 1	130070	ID/CFD	no	no	no	no	no
Hamamy Syndrome	611174	ID/CFD	no	no	no	no	no
Immunodeficiency-centromeric Instability-facial anomalies syndrome 2	614069	ID/CFD	no	no	no	no	no
Joubert Syndrome 14	614424	ID/CFD	yes	no	yes	no	yes
Lenz-Majewski Hyperostotic Dwarfism	151050	ID/CFD	yes	yes	no	no	no
Mental Retardation, Autosomal Recessive 39	615541	ID/CFD	no	no	no	no	no
Mental Retardation, Autosomal Recessive 45	615979	ID/CFD	no	no	no	no	no
Mucolipidosis II Alpha/Beta	252500	ID/CFD	no	no	no	no	no
Noonan Syndrome 4	610733	ID/CFD	no	no	no	no	no
Noonan Syndrome 8	615355	ID/CFD	no	no	no	no	no
Orofaciodigital Syndrome V	174300	ID/CFD	yes	yes	no	no	no
Otofaciocervical Syndrome 1	166780	ID/CFD	no	no	no	no	no
Otofaciocervical Syndrome 2	615560	ID/CFD	no	no	no	no	no
Shprintzen-Goldberg Craniosyno-stosis Syndrome	182212	ID/CFD	yes	no	no	no	yes
Skeletal Defects, Genital Hypoplasia, and Mental Retardation	612447	ID/CFD	no	no	no	no	no
Xia-Gibbs Syndrome	615829	ID/CFD	yes	no	yes	yes	no
Cerebellar Ataxia, Mental Retardation, and Dysequilibrium Syndrome 2	610185	ID/CFD/NLF	no	no	no	no	yes
Hurler Syndrome	607014	ID/CFD/NLF	no	no	no	no	no
Mannosidosis, Alpha B, Lysosomal	248500	ID/CFD/NLF	no	no	no	no	no
Spastic Paraplegia 50, Autosomal Recessive	612936	ID/CFD/NLF	yes	no	no	no	no
Cerebellar Ataxia, Mental Retardation, and Dysequilibrium Syndrome 3	613227	ID/NLF	no	no	no	no	no
Cerebellar Ataxia, Mental Retardation, and Dysequilibrium Syndrome 4	615268	ID/NLF	no	no	no	no	no
Cowchock Syndrome	310490	ID/NLF	no	no	no	no	no
Homocystinuria-megaloblastic Anemia, cb1E Complementation Type	236270	ID/NLF	no	no	no	no	no
Lesch-Nyhan Syndrome	300322	ID/NLF	no	no	no	no	no
Mitochondrial Complex III Deficiency, Nuclear Type 4	615159	ID/NLF	no	no	no	no	no
Mental Retardation, Autosomal Recessive 1	249500	ID/NLF	no	no	no	no	no
Mental Retardation, Autosomal Recessive 40	615599	ID/NLF	yes	no	no	no	no
Pyruvate Dehydrogenase E2 Deficiency	245348	ID/NLF	no	no	no	no	no
Spastic Paraplegia 10, Autosomal Dominant	604187	ID/NLF	no	no	no	no	no
Spastic Paraplegia 55, Autosomal Recessive	615035	ID/NLF	yes	no	no	no	no
Spastic Paraplegia 64, Autosomal Recessive	615683	ID/NLF	no	no	no	no	no
Spinocerebellar Ataxia, Autosomal Recessive 14	615386	ID/NLF	no	no	no	no	no
Urocanase Deficiency	276880	ID/NLF	no	no	no	no	no
Camptodactyly, Tall Stature, and Hearing Loss Syndrome	610474	ID/SFD	no	no	no	no	no
Chondrodys-plasia Punctata 1, X-linked Recessive	302950	ID/SFD	no	no	no	no	no
Coloboma, Ocular, with or without Hearing Impairment, Cleft Lip/Palate, and/or Mental Retardation	120433	ID/SFD	no	no	no	no	no
Congenital Disorder of Glycosylation, Type IId	607091	ID/SFD	no	no	no	no	no
Frontonasal Dysplasia 2	613451	ID/SFD	yes	yes	yes	no	yes
Kahrizi Syndrome	612713	ID/SFD	no	no	no	no	no
Mental Retardation, Enteropathy, Deafness, Peripheral Neuropathy, Ichthyosis, and Keratoderma	609313	ID/SFD	no	no	no	no	no
Mental Retardation, X-linked 93	300659	ID/SFD	no	no	no	no	no
Microcephaly 8, Primary, Autosomal Recessive	614673	ID/SFD	no	no	no	no	no
Shaheen Syndrome	615328	ID/SFD	no	no	no	no	no
Congenital Cataracts, Facial Dysmorphism, and Neuropathy	604168	ID/SFD/NLF	no	no	no	no	no
Muscular Dystrophy-Dystroglycanopathy (Congenital with Mental Retardation), Type B, 2	613156	ID/SFD/NLF	yes	no	yes	no	yes
Muscular Dystrophy-Dystroglycano-pathy (Congenital with Mental Retardation), Type B, 6	608840	ID/SFD/NLF	yes	no	yes	yes	yes
Spastic Paraplegia 54, Autosomal Recessive	615033	ID/SFD/NLF	yes	no	no	no	no
Alacrima, Achalasia, and Mental Retardation Syndrome	615510	ID/NONE	no	no	no	no	no
Bardet-Biedl Syndrome 7	615984	ID/NONE	no	no	no	no	no
Bartter Syndrome, Type 3	607364	ID/NONE	no	no	no	no	no
Emery-Dreifuss Muscular Dystrophy 1, X-linked	310300	ID/NONE	no	no	no	no	no
Feingold Syndrome 2	614326	ID/NONE	no	no	no	no	no
Formiminotrans-ferase Deficiency	229100	ID/NONE	no	no	no	no	no
Intrinsic Factor Deficiency	261000	ID/NONE	no	no	no	no	no
Joubert Syndrome 15	614464	ID/NONE	yes	no	no	no	no
Joubert Syndrome 17	614615	ID/NONE	yes	no	yes	no	yes
Mental Retardation, Autosomal Recessive 2	607417	ID/NONE	no	no	no	no	no
Mental Retardation, Autosomal Recessive 36	615286	ID/NONE	no	no	no	no	no
Mental Retardation, Autosomal Recessive 43	615817	ID/NONE	no	no	no	no	no
Mental Retardation, Truncal Obesity, Retinal Dystrophy, and Micropenis	610156	ID/NONE	no	no	no	no	no
Microcephaly 4, Primary, Autosomal Recessive	604321	ID/NONE	no	no	no	no	no
Orotic Aciduria	258900	ID/NONE	no	no	no	no	no
Renal Tubular Acidosis, Proximal, with Ocular Abnormalities and Mental Retardation	604278	ID/NONE	no	no	no	no	no

## Sheet: Table_9
Table 9. Malformations of the subcortical, midbrain, and brainstem regions and occurrence of hydrocephaly.
Condition	OMIM#	Subgroup	Subcort.	Midbrain	Brainstem	Hydrocephalus
CHARGE Syndrome	214800	AUT/CFD	no	no	no	no
Cohen Syndrome	216550	AUT/CFD	no	no	no	no
Glass Syndrome	612313	AUT/CFD	no	no	no	no
Fragile X Mental Retardation Syndrome	300624	AUT/CFD	no	no	no	no
Helsmoortel-Van der AA Syndrome	615873	AUT/CFD	no	no	no	no
Kleefstra Syndrome	610253	AUT/CFD	no	no	no	no
Lujan-Fryns Syndrome	309520	AUT/CFD	no	no	no	no
Mental Retardation with Language Impairment and with or without Autistic Features	613670	AUT/CFD	no	no	no	no
Mental Retardation, Autosomal Dominant 1	156200	AUT/CFD	no	no	no	no
Mental Retardation, Autosomal Dominant 23	615761	AUT/CFD	no	no	no	no
Mental Retardation, Autosomal Dominant 24	615828	AUT/CFD	no	no	no	no
Mental Retardation, Autosomal Dominant 30	616083	AUT/CFD	no	no	no	no
Mental Retardation, X-linked, Syndromic 14	300676	AUT/CFD	no	no	no	no
Mental Retardation, X-linked, Syndromic, Wu Type	300699	AUT/CFD	no	no	no	no
Mowat-Wilson Syndrome	235730	AUT/CFD	no	no	no	no
Mucopoly-saccharidosis, Type IIIA	252900	AUT/CFD	no	no	no	no
Nicolaides-Baraitser Syndrome	601358	AUT/CFD	no	no	no	no
Phelan-McDermid Syndrome	606232	AUT/CFD	no	no	no	no
Schaaf-Yang Syndrome	615547	AUT/CFD	no	no	no	no
Smith-Magenis Syndrome	182290	AUT/CFD	no	no	no	yes
Temtamy Syndrome	218340	AUT/CFD	yes	no	no	yes
Wiedemann-Steiner Syndrome	605130	AUT/CFD	no	no	no	no
Adenylosuccinase Deficiency	103050	AUT/CFD/NLF	no	no	no	no
Alpha-thalassemia/Mental Retardation Syndrome, X-linked	301040	AUT/CFD/NLF	no	no	no	no
Angelman Syndrome	105830	AUT/CFD/NLF	no	no	no	no
Cardiofaciocutaneous Syndrome 1	115150	AUT/CFD/NLF	no	no	no	yes
Cerebral Creatine Deficiency 1	300352	AUT/CFD/NLF	no	no	no	no
Cornelia de Lange Syndrome	122470	AUT/CFD/NLF	no	no	no	no
Lubs X-linked Mental Retardation Syndrome (MECP2 Duplication Syndrome included)	300260	AUT/CFD/NLF	no	no	no	no
Marshall-Smith Syndrome	602535	AUT/CFD/NLF	no	no	no	no
Mental Retardation, X-linked 98	300912	AUT/CFD/NLF	no	no	no	no
Mental Retardation, X-linked, Syndromic, Christianson Type	300243	AUT/CFD/NLF	no	no	no	no
Myhre Syndrome	139210	AUT/CFD/NLF	no	no	no	no
Pitt-Hopkins Syndrome	610954	AUT/CFD/NLF	yes	no	no	yes
Renpenning Syndrome 1	309500	AUT/CFD/NLF	no	no	no	no
Smith-Lemli-Opitz Syndrome	270400	AUT/CFD/NLF	no	no	no	yes
Tritchothiodystrophy 4, Nonphoto-sensitive	234050	AUT/CFD/NLF	no	no	no	no
Warburg Micro Syndrome 4	615663	AUT/CFD/NLF	no	no	no	yes
Cerebral Creatine Deficiency Syndrome 2	612736	AUT/NLF	no	no	no	no
Epileptic Encephalopathy, Early Infantile, 4	612164	AUT/NLF	no	no	no	no
Epileptic Encephalopathy, Early Infantile, 6	607208	AUT/NLF	no	no	no	no
Myotonic Dystrophy 1	160900	AUT/NLF	no	no	no	no
Neurodegeneration due to Cerebral Folate Transport Deficiency	613068	AUT/NLF	no	no	no	no
Rett Syndrome	312750	AUT/NLF	no	no	no	no
Rett Syndrome, Congenital	613454	AUT/NLF	no	no	no	no
Arthrogryposis, Mental Retardation, and Seizures	615553	AUT/SFD	no	no	no	no
Mental Retardation, Autosomal Recessive 38	615516	AUT/SFD	no	no	no	no
Mental Retardation, X-linked 72	300271	AUT/SFD	no	no	no	no
Lowe Oculocerebral Syndrome 1	309000	AUT/SFD/NLF	no	no	no	yes
Norrie Disease	310600	AUT/SFD/NLF	no	no	no	no
Tuberous Sclerosis 2	613254	AUT/SFD/NLF	no	no	no	no
Brunner Syndrome	300615	AUT/NONE	no	no	no	no
Cerebral Creatine Deficiency Syndrome 3	612718	AUT/NONE	no	no	no	no
Epileptic Encephalopathy, Childhood Onset	615369	AUT/NONE	no	no	no	no
Epileptic Encephalopathy, Early Infantile, 24	615871	AUT/NONE	no	no	no	no
Epileptic Encephalopathy, Early Infantile, 9	300088	AUT/NONE	no	no	no	no
Mental Retardation, Autosomal Dominant 5	612621	AUT/NONE	no	no	no	no
Mental Retardation, Autosomal Recessive 3	608443	AUT/NONE	no	no	no	no
Muscular Dystrophy-Dystroglycanopathy (Congenital with Mental Retardation), Type B, 3 (Muscle-eye-brain disease)	613151	AUT/NONE	no	no	yes	yes
Acromelic Frontonasal Dysostosis	603671	EPI/CFD	no	no	no	no
Bohring-Opitz Syndrome	605039	EPI/CFD	no	no	no	no
CK Syndrome	300831	EPI/CFD	no	no	no	no
Cutis Laxa, Autosomal Recessive, Type IIA	219200	EPI/CFD	no	no	no	no
Hyperphosphatasia with Mental Retardation Syndrome 4	615716	EPI/CFD	no	no	no	no
Hypoparathyroidism-retardation-dysmorphism Syndrome	241410	EPI/CFD	no	no	no	yes
Koolen-De Vries Syndrome	610443	EPI/CFD	no	no	no	yes
Mandibulofacial Dysostosis, Guion-Almeida Type	610536	EPI/CFD	no	no	no	no
Mental Retardation, Autosomal Recessive 41	615637	EPI/CFD	no	no	no	no
Mental Retardation, X-linked 30	300558	EPI/CFD	no	no	no	no
Mental Retardation, X-linked, Syndromic, Snyder-Robinson Type	309583	EPI/CFD	no	no	no	no
Microcephaly, Short Stature, and Impaired Glucose Metabolism	616033	EPI/CFD	no	no	no	no
Psychomotor Retardation, Epilepsy, and Craniofacial Dysmorphism	614501	EPI/CFD	no	no	no	yes
Seckel Syndrome 1	210600	EPI/CFD	yes	no	no	no
Aspartylglucosaminuria	208400	EPI/CFD/NLF	no	no	no	no
Band-like Calcification with Simplified Gyration and Polymicrogyria	251290	EPI/CFD/NLF	no	no	no	no
Baraitser-Winter Syndrome 1	243310	EPI/CFD/NLF	no	no	no	yes
Coloboma, Congenital Heart Disease, Ichthyosiform Dermatosis, Mental Retardation, and Ear Anomalies Syndrome	280000	EPI/CFD/NLF	no	no	no	no
Congenital Disorder of Glycosylation, Type Ie	608799	EPI/CFD/NLF	no	no	no	no
Congenital Disorder of Glycosylation, Type IIa	212066	EPI/CFD/NLF	no	no	no	no
Cutis Laxa, Autosomal Recessive, Type IIIA	219150	EPI/CFD/NLF	no	no	no	no
Desmosterolosis	602398	EPI/CFD/NLF	no	no	no	yes
Galactosialidosis	256540	EPI/CFD/NLF	no	no	no	no
Leukoencephalopathy, Cystic, without Megalencephaly	612951	EPI/CFD/NLF	no	no	no	yes
Megalencephaly-polymicrogyria-polydactyly-hydrocephalus Syndrome 1	603387	EPI/CFD/NLF	no	no	no	yes
Mental Retardation, X-linked, Syndromic, Cabezas Type	300354	EPI/CFD/NLF	no	no	no	yes
Microcephaly, Progressive, with Seizures and Cerebral and Cerebellar Atrophy	615760	EPI/CFD/NLF	no	no	no	yes
Microhydranencephaly	605013	EPI/CFD/NLF	no	no	yes	yes
Mitochondrial DNA Depletion Syndrome 13 (Encephalomyopathic Type)	615471	EPI/CFD/NLF	no	no	no	no
Multiple Congenital Anomalies-hypotonia-seizures Syndrome 2	300868	EPI/CFD/NLF	no	no	yes	no
Pontocerebellar Hypoplasia, Type 10	615803	EPI/CFD/NLF	no	no	yes	yes
Pyruvate Dehydrogenase E1-alpha Deficiency	312170	EPI/CFD/NLF	no	no	no	yes
Spastic Paraplegia 49, Autosomal Recessive	615031	EPI/CFD/NLF	no	no	no	no
Vici Syndrome	242840	EPI/CFD/NLF	no	no	no	no
Warburg Micro Syndrome 3	614222	EPI/CFD/NLF	no	no	no	yes
Alternating Hemiplegia of Childhood 1	104290	EPI/NLF	no	no	no	no
Alternating Hemiplegia of Childhood 2	614820	EPI/NLF	no	no	no	no
Argininemia	207800	EPI/NLF	no	no	no	no
Ceroid Lipofuscinosis, Neuronal, 1	256730	EPI/NLF	no	no	no	no
Congenital Disorder of Glycosylation, Type Ic	603147	EPI/NLF	no	no	no	no
Cortical Dysplasia, Complex, with Other Brain Malformations 1	614039	EPI/NLF	yes	no	yes	no
Cortical Dysplasia, Complex, with Other Brain Malformations 2	615282	EPI/NLF	no	no	yes	no
Encephalopathy, Acute, Infection-induced, Susceptibility to, 3	608033	EPI/NLF	no	no	no	no
Epilepsy, Progressive Myoclonic, 3, with or without Intracellular Inclusions	611726	EPI/NLF	no	no	no	no
Epileptic Encephalopathy, Early Infantile, 5	613477	EPI/NLF	no	no	no	no
Epileptic Encephalopathy, Early Infantile, 7	613720	EPI/NLF	no	no	no	no
Epileptic Encephalopathy, Early Infantile, 8	300607	EPI/NLF	no	no	no	no
GLUT1 Deficiency Syndrome 1	606777	EPI/NLF	no	no	no	no
Homocystinuria-megaloblastic Anemia, cb1G Complementation Type	250940	EPI/NLF	no	no	no	no
Hyperphosphatasia with Mental Retardation Syndrome 3	614207	EPI/NLF	no	no	no	no
Ichthyosis, Spastic Quadriplegia, and Mental Retardation	614457	EPI/NLF	no	no	no	no
Leukodystrophy, Hypomyelin-ating, 5	610532	EPI/NLF	no	no	no	no
Malonyl-CoA Decarboxylase Deficiency	248360	EPI/NLF	no	no	no	no
Megaloblastic Anemia due to Dihydrofolate Reductase Deficiency	613839	EPI/NLF	no	no	no	no
Microcephaly 2, Primary, Autosomal Recessive, with or without Cortical Malformations	604317	EPI/NLF	no	no	no	no
Microcephaly, Seizures, and Developmental Delay	613402	EPI/NLF	no	no	no	yes
Neurodegeneration with Brain Iron Accumulation 5	300894	EPI/NLF	no	no	no	no
Pelizaeus-Merzbacher Disease	312080	EPI/NLF	no	no	no	no
Phosphoglycerate Dehydrogenase Deficiency	601815	EPI/NLF	no	no	no	no
Polymicrogyria with Seizures	614833	EPI/NLF	no	no	no	no
Pontocerebellar Hypoplasia, Type 2D	613811	EPI/NLF	no	no	no	no
Pontocerebellar Hypoplasia, Type 2E	615851	EPI/NLF	no	no	no	no
Salt and Pepper Developmental Regression Syndrome	609056	EPI/NLF	no	no	no	no
Schindler Disease, Type 1	609241	EPI/NLF	no	no	no	no
Spinocerebellar Ataxia, Autosomal Recessive 13	614831	EPI/NLF	no	no	no	yes
Thiamine Metabolism Dysfunction Syndrome 2 (Biotin- or Thiamine-responsive Type)	607483	EPI/NLF	no	no	no	no
Epileptic Encephalopathy, Early Infantile, 18	615476	EPI/SFD	no	no	no	no
Microcephaly 5, Primary, Autosomal Recessive	608716	EPI/SFD	no	no	yes	yes
Congenital Disorder of Glycosylation, Type Is	300884	EPI/SFD/NLF	no	no	no	yes
D-2-Hydroxyglutaric Aciduria 1	600721	EPI/SFD/NLF	no	no	no	yes
Hypermethioninemia due to Adenosine Kinase Deficiency	614300	EPI/SFD/NLF	no	no	no	no
Pyruvate Dehydrogenase E3-binding Protein Deficiency	245349	EPI/SFD/NLF	no	no	no	no
Spastic Paraplegia 18, Autosomal Recessive	611225	EPI/SFD/NLF	no	no	no	no
Spinocerebellar Ataxia, Autosomal Recessive 12	614322	EPI/SFD/NLF	no	no	no	no
Cortical Dysplasia, Complex, with Other Brain Malformations 5	615763	EPI/NONE	yes	no	yes	no
Epileptic Encephalopathy, Early Infantile, 19	615744	EPI/NONE	no	no	no	no
Epilepsy, Nocturnal Frontal Lobe, 5	615005	EPI/NONE	no	no	no	no
Hydrocephalus, Nonsyndromic, Autosomal Recessive 1	236600	EPI/NONE	no	no	no	yes
Hyperlysinemia, Type I	238700	EPI/NONE	no	no	no	no
Hyperprolinemia, Type II	239510	EPI/NONE	no	no	no	no
Mental Retardation, X-linked 96	300802	EPI/NONE	no	no	no	no
Muscular Dystrophy-Dystroglycanopathy (Congenital with Mental Retardation), Type B, 14	615351	EPI/NONE	no	no	no	no
Polymicrogyria with Optic Nerve Hypoplasia	613180	EPI/NONE	no	no	yes	no
Acrodysostosis 1 with or without Hormone Resistance	101800	ID/CFD	no	no	no	yes
Alazami Syndrome	615071	ID/CFD	no	no	no	no
Beaulieu-Boycott-Innes Syndrome	613680	ID/CFD	no	no	no	no
Corpus Callosum, Agenesis of, with Mental Retardation, Ocular Coloboma, and Micrognathia	300472	ID/CFD	no	no	no	no
Craniofacial Dysmorphism, Skeletal Anomalies, and Mental Retardation Syndrome	213980	ID/CFD	no	no	no	yes
Desbuquois Dysplasia 2	615777	ID/CFD	no	no	no	no
Ehlers-Danlos Syndrome, Progeroid Type, 1	130070	ID/CFD	no	no	no	no
Hamamy Syndrome	611174	ID/CFD	no	no	no	no
Immunodeficiency-centromeric Instability-facial anomalies syndrome 2	614069	ID/CFD	no	no	no	no
Joubert Syndrome 14	614424	ID/CFD	no	yes	no	no
Lenz-Majewski Hyperostotic Dwarfism	151050	ID/CFD	no	no	no	no
Mental Retardation, Autosomal Recessive 39	615541	ID/CFD	no	no	no	no
Mental Retardation, Autosomal Recessive 45	615979	ID/CFD	no	no	no	no
Mucolipidosis II Alpha/Beta	252500	ID/CFD	no	no	no	no
Noonan Syndrome 4	610733	ID/CFD	no	no	no	no
Noonan Syndrome 8	615355	ID/CFD	no	no	no	no
Orofaciodigital Syndrome V	174300	ID/CFD	no	no	no	no
Otofaciocervical Syndrome 1	166780	ID/CFD	no	no	no	no
Otofaciocervical Syndrome 2	615560	ID/CFD	no	no	no	no
Shprintzen-Goldberg Craniosyno-stosis Syndrome	182212	ID/CFD	no	no	no	yes
Skeletal Defects, Genital Hypoplasia, and Mental Retardation	612447	ID/CFD	no	no	no	no
Xia-Gibbs Syndrome	615829	ID/CFD	no	no	no	no
Cerebellar Ataxia, Mental Retardation, and Dysequilibrium Syndrome 2	610185	ID/CFD/NLF	no	no	no	no
Hurler Syndrome	607014	ID/CFD/NLF	no	no	no	no
Mannosidosis, Alpha B, Lysosomal	248500	ID/CFD/NLF	no	no	no	no
Spastic Paraplegia 50, Autosomal Recessive	612936	ID/CFD/NLF	no	no	no	yes
Cerebellar Ataxia, Mental Retardation, and Dysequilibrium Syndrome 3	613227	ID/NLF	no	no	no	no
Cerebellar Ataxia, Mental Retardation, and Dysequilibrium Syndrome 4	615268	ID/NLF	no	no	no	no
Cowchock Syndrome	310490	ID/NLF	no	no	no	no
Homocystinuria-megaloblastic Anemia, cb1E Complementation Type	236270	ID/NLF	no	no	no	no
Lesch-Nyhan Syndrome	300322	ID/NLF	no	no	no	no
Mitochondrial Complex III Deficiency, Nuclear Type 4	615159	ID/NLF	no	no	no	no
Mental Retardation, Autosomal Recessive 1	249500	ID/NLF	no	no	no	no
Mental Retardation, Autosomal Recessive 40	615599	ID/NLF	no	no	no	no
Pyruvate Dehydrogenase E2 Deficiency	245348	ID/NLF	no	no	no	no
Spastic Paraplegia 10, Autosomal Dominant	604187	ID/NLF	no	no	no	no
Spastic Paraplegia 55, Autosomal Recessive	615035	ID/NLF	no	no	no	no
Spastic Paraplegia 64, Autosomal Recessive	615683	ID/NLF	no	no	no	no
Spinocerebellar Ataxia, Autosomal Recessive 14	615386	ID/NLF	no	no	no	no
Urocanase Deficiency	276880	ID/NLF	no	no	no	no
Camptodactyly, Tall Stature, and Hearing Loss Syndrome	610474	ID/SFD	no	no	no	no
Chondrodys-plasia Punctata 1, X-linked Recessive	302950	ID/SFD	no	no	no	no
Coloboma, Ocular, with or without Hearing Impairment, Cleft Lip/Palate, and/or Mental Retardation	120433	ID/SFD	no	no	no	no
Congenital Disorder of Glycosylation, Type IId	607091	ID/SFD	no	no	no	no
Frontonasal Dysplasia 2	613451	ID/SFD	no	no	no	no
Kahrizi Syndrome	612713	ID/SFD	no	no	no	no
Mental Retardation, Enteropathy, Deafness, Peripheral Neuropathy, Ichthyosis, and Keratoderma	609313	ID/SFD	no	no	no	no
Mental Retardation, X-linked 93	300659	ID/SFD	no	no	no	no
Microcephaly 8, Primary, Autosomal Recessive	614673	ID/SFD	no	no	no	no
Shaheen Syndrome	615328	ID/SFD	no	no	no	no
Congenital Cataracts, Facial Dysmorphism, and Neuropathy	604168	ID/SFD/NLF	no	no	no	no
Muscular Dystrophy-Dystroglycanopathy (Congenital with Mental Retardation), Type B, 2	613156	ID/SFD/NLF	no	no	yes	yes
Muscular Dystrophy-Dystroglycano-pathy (Congenital with Mental Retardation), Type B, 6	608840	ID/SFD/NLF	no	no	yes	no
Spastic Paraplegia 54, Autosomal Recessive	615033	ID/SFD/NLF	no	no	no	no
Alacrima, Achalasia, and Mental Retardation Syndrome	615510	ID/NONE	no	no	no	no
Bardet-Biedl Syndrome 7	615984	ID/NONE	no	no	no	no
Bartter Syndrome, Type 3	607364	ID/NONE	no	no	no	no
Emery-Dreifuss Muscular Dystrophy 1, X-linked	310300	ID/NONE	no	no	no	no
Feingold Syndrome 2	614326	ID/NONE	no	no	no	no
Formiminotrans-ferase Deficiency	229100	ID/NONE	no	no	no	no
Intrinsic Factor Deficiency	261000	ID/NONE	no	no	no	no
Joubert Syndrome 15	614464	ID/NONE	no	yes	no	no
Joubert Syndrome 17	614615	ID/NONE	no	yes	no	no
Mental Retardation, Autosomal Recessive 2	607417	ID/NONE	no	no	no	no
Mental Retardation, Autosomal Recessive 36	615286	ID/NONE	no	no	no	yes
Mental Retardation, Autosomal Recessive 43	615817	ID/NONE	no	no	no	no
Mental Retardation, Truncal Obesity, Retinal Dystrophy, and Micropenis	610156	ID/NONE	no	no	no	no
Microcephaly 4, Primary, Autosomal Recessive	604321	ID/NONE	no	no	no	no
Orotic Aciduria	258900	ID/NONE	no	no	no	no
Renal Tubular Acidosis, Proximal, with Ocular Abnormalities and Mental Retardation	604278	ID/NONE	no	no	no	no

[truncated: 1 more sheets: Table_10]
